# Supplementary material for: Dynamics of duplicated gene regulatory networks governing cotton fiber development following polyploidy
Source: Research Square preprint supplement (doi:10.21203/rs.3.rs-4942946/v1), 2024-09-04
Supplement: Supplementary file 1 [file 5333e56190b3c8beb1559df6.xlsx]

## Sheet: Supplementary Table 1
Supplementary Table 1. RNA-seq datasets from 12 studies were used in this study.
Bioproject	Number of samples	Time points	References	Accessions
PRJNA263926	45	5 , 15 , 18 , 21 and 28 dpa	Tuttle et al., 2015	Gossypium hirsutum cultivar Deltapine 90
PRJNA248163	4	5 , 10 , 15 and 20 dpa	Zhang et al., 2015	Gossypium hirsutum cultivar Texas Marker-1 (TM-1)
PRJNA326737	4	8 and 20 dpa	Hinchliffe et al., 2016	White cotton fiber line MC-WL and brown cotton fiber line MC-BL
PRJNA385764	28	5 , 7 , 10 , 15 , 20 , 25 and 28 dpa	Lu et al., 2017	G. hirsutum CCRI45 and three G. barbadense chromosome introgression lines
PRJNA529497	28	10 and 20 dpa	Bao et al., 2019	A G. hirsutum wild accession, TX2094, a G. hirsutum elite cultivar, Acala Maxxa (hereafter Maxxa), and their reciprocal F1 hybrids Maxxa × TX2094 (M × T) and TX2094 × Maxxa (T × M)
PRJNA565616	18	12 , 18 and 24 dpa	Sun et al., 2019	Gossypium hirsutum green fiber cultivar Xincaimian No. 7 (C7) and it near iso-genic lines with white fiber
PRJNA508480	30	10 , 15 , 20 , 25 and 30 dpa	Zou et al., 2019	Two upland cotton lines designated 69307 (L1) and 69362 (L2)
PRJNA490626	10	10 , 15 , 20 and 25 dpa	Hu et al., 2019	Gossypium hirsutum cultivar Texas Marker-1 (TM-1)
PRJNA433615	251	15 dpa	Li et al., 2020	251 upland cotton accessions
PRJNA594268	3	15 dpa	Huang et al., 2020	Gossypium hirsutum cultivar Texas Marker-1 (TM-1)
PRJNA436644	10	13，16，19，22 and 25 dpa	Zhang et al., 2021	Gossypium hirsutum cultivar Texas Marker-1 (TM-1)
PRJNA634606	42	0 , 3 , 5 , 10 , 15 and 20 dpa	He et al., 2021	A long-fiber Gossypium hirsutum accession (ZRI015) and a short-fiber Gossypium hirsutum accession (ZRI015)

## Sheet: Supplementary Table 2
Supplementary Table 2. Summary statistics of 413 RNA-seq samples passing quality filters.
BioProject	SRA	name	GC	Raw_reads	Clean_reads	Q20(%)	Q30(%)	Clean base (G)	Uniquely mapped read	Uniquely mapped	outlier
PRJNA565616	SRR10121890	12dpa	0.4448	59264564	58288210	0.9775	0.9424	8.68	49788590	0.8542
	SRR10121891	24dpa	0.4498	42603788	41955998	0.9677	0.9172	6.21	34784018	0.8291
	SRR10121892	24dpa	0.4503	48097868	47277176	0.9671	0.9162	6.99	39263336	0.8305
	SRR10121893	24dpa	0.4494	49427032	48765948	0.969	0.9203	7.22	40608037	0.8327
	SRR10121894	18dpa	0.445	49158218	48348452	0.9694	0.9205	7.19	40821842	0.8443
	SRR10121895	18dpa	0.4496	44498854	43856224	0.9699	0.9215	6.52	37217465	0.8486
	SRR10121896	18dpa	0.448	49377632	48523986	0.9764	0.9404	7.2	41315236	0.8514
	SRR10121897	12dpa	0.4458	56056762	55254038	0.9782	0.9438	8.23	47215558	0.8545
	SRR10121898	24dpa	0.4352	52833010	52051134	0.9783	0.9427	7.75	46631353	0.8959
	SRR10121899	24dpa	0.4481	47749390	46949860	0.9767	0.9409	6.97	40642115	0.8656
	SRR10121900	24dpa	0.4434	52804876	51987318	0.9765	0.9408	7.72	44998463	0.8656
	SRR10121901	18dpa	0.4499	53186820	52341286	0.9776	0.9428	7.79	44393009	0.8481
	SRR10121902	18dpa	0.4485	51075994	50203006	0.9769	0.9411	7.46	42512389	0.8468
	SRR10121903	18dpa	0.4465	59546232	58639340	0.9778	0.9431	8.72	50335995	0.8584
	SRR10121904	12dpa	0.4449	58036170	57288792	0.9788	0.945	8.54	49272712	0.8601
	SRR10121905	12dpa	0.4466	57261376	56415416	0.9784	0.9443	8.4	48375058	0.8575
	SRR10121906	12dpa	0.4458	48041034	47280848	0.9779	0.9434	7.04	40615396	0.859
	SRR10121907	12dpa	0.4468	52169812	51374606	0.9781	0.9438	7.65	44135247	0.8591
PRJNA385764	SRR10426346	10dpa	0.4553	39374174	38335082	0.9538	0.9074	4.79	31477227	0.8211
	SRR10426347	7dpa	0.4485	38114718	37327522	0.9652	0.9294	4.66	33330873	0.8929
	SRR10426349	28dpa	0.4618	39142320	38197510	0.955	0.9095	4.75	30997086	0.8115
	SRR10426350	25dpa	0.4638	39877128	38930272	0.9566	0.9124	4.84	30191311	0.7755
	SRR10426351	20dpa	0.454	43076084	42205302	0.9656	0.9301	5.26	35541294	0.8421
	SRR10426352	15dpa	0.464	46170462	45181876	0.9579	0.9148	5.64	35930331	0.7952
	SRR10426354	28dpa	0.4527	49427290	48593376	0.9693	0.9372	6.05	42399788	0.8725
	SRR10426355	25dpa	0.4527	43437774	42580978	0.9656	0.9299	5.29	37312265	0.8763
	SRR10426356	20dpa	0.4494	45264550	44400414	0.9618	0.9216	5.52	38546274	0.8682
	SRR10426357	15dpa	0.4524	52114366	50984066	0.9678	0.9345	6.36	44568432	0.8742
	SRR10426358	10dpa	0.4481	46417522	45429184	0.9666	0.9321	5.67	40396639	0.8892
	SRR10426359	7dpa	0.4516	46708166	45539560	0.9545	0.9094	5.69	39552188	0.8685
	SRR10426360	5dpa	0.4559	74439862	72943216	0.9599	0.9179	9.11	62103451	0.8514
	SRR10426361	10dpa	0.4531	40210030	39391054	0.9636	0.9258	4.92	33351093	0.8467
	SRR10426362	25dpa	0.4523	45382062	44545452	0.9652	0.9287	5.52	37677656	0.8458
	SRR10426363	20dpa	0.4503	46222336	45331550	0.9677	0.9343	5.64	39231440	0.8654
	SRR10426364	15dpa	0.4526	49069702	48483646	0.975	0.9478	6.05	42517685	0.8769
	SRR10426365	10dpa	0.4515	50280314	49677990	0.9768	0.9517	6.2	44320911	0.8922
	SRR10426366	7dpa	0.4519	72120464	70711812	0.9601	0.9183	8.83	62479907	0.8836
	SRR10426368	28dpa	0.4477	43163432	42125478	0.9607	0.9208	5.24	37184734	0.8827
	SRR10426370	20dpa	0.4476	39459102	38545178	0.9562	0.9121	4.8	34109695	0.8849
	SRR10426371	15dpa	0.4481	38119838	37196024	0.9553	0.9104	4.64	32424403	0.8717
	SRR10426372	7dpa	0.4504	40928930	40104496	0.9663	0.9315	5.01	35219585	0.8782
	SRR10426373	5dpa	0.4514	39040990	38199172	0.9647	0.9284	4.77	32614787	0.8538
PRJNA263926	SRR1633036	15dpa	0.4395	37896058	35126108	0.9622	0.8846	3.54	30465740	0.8673
	SRR1633037	15dpa	0.4415	40400458	38236454	0.9693	0.8979	3.85	33099966	0.8657
	SRR1633038	15dpa	0.4415	35391488	33155612	0.9648	0.8953	3.34	28810744	0.869
	SRR1633042	15dpa	0.4399	58452742	53783660	0.9613	0.8832	5.42	46565010	0.8658
	SRR1633043	15dpa	0.4419	75551740	70895234	0.9678	0.8954	7.14	61146551	0.8625
	SRR1633044	15dpa	0.442	65461236	60819330	0.964	0.8941	6.13	52794608	0.8681
	SRR1633054	28dpa	0.4521	38907216	36977434	0.9783	0.9391	3.72	30564503	0.8266
	SRR1633055	28dpa	0.4521	39049076	37246614	0.9785	0.9401	3.75	30751266	0.8256
	SRR1633056	28dpa	0.452	30590454	28928926	0.9754	0.933	2.91	23982921	0.829
	SRR1633057	28dpa	0.4526	56981552	54491184	0.9831	0.9432	5.48	44748460	0.8212
	SRR1633058	28dpa	0.4526	58159610	55820338	0.9837	0.9448	5.61	45801785	0.8205
	SRR1633059	28dpa	0.4527	44154536	42155840	0.9809	0.938	4.24	34768191	0.8248
	SRR1633060	28dpa	0.4527	71001360	68315518	0.9831	0.9417	6.87	56362215	0.825
	SRR1633061	28dpa	0.4527	73165118	70701648	0.984	0.9439	7.11	58374677	0.8256
	SRR1633062	28dpa	0.4527	54910370	52838386	0.9808	0.937	5.32	43762991	0.8282
	SRR1633072	10dpa	0.4409	57870586	55149128	0.9746	0.9136	5.55	47554378	0.8623
	SRR1633073	10dpa	0.439	58455048	54759866	0.97	0.9034	5.46	47410569	0.8658
	SRR1633074	10dpa	0.4389	58142096	53800528	0.9553	0.8747	5.42	46623301	0.8666
	SRR1633075	10dpa	0.4417	63067026	60234730	0.9748	0.9137	6.06	51999710	0.8633
	SRR1633076	10dpa	0.4398	61100238	57400782	0.9689	0.9029	5.72	49670187	0.8653
	SRR1633077	10dpa	0.44	60877706	56483426	0.9554	0.8746	5.69	48924236	0.8662
	SRR1633078	10dpa	0.4415	78553192	75285648	0.975	0.9134	7.57	64041302	0.8506
	SRR1633079	10dpa	0.4398	76326402	72067888	0.9703	0.903	7.17	61415295	0.8522
	SRR1633080	10dpa	0.4398	75707700	70749376	0.9563	0.8753	7.11	60380213	0.8534
	SRR1633090	18dpa	0.4438	74603156	71328202	0.9719	0.904	7.16	60328737	0.8458
	SRR1633091	18dpa	0.4424	74720066	69628668	0.958	0.8775	6.99	58992781	0.8472
	SRR1633092	18dpa	0.4429	74308880	69665614	0.9622	0.8871	6.99	58950491	0.8462
	SRR1633093	18dpa	0.4439	86431512	82652168	0.9717	0.9038	8.31	70388760	0.8516
	SRR1633094	18dpa	0.4424	86184960	80255582	0.9577	0.8772	8.07	68406913	0.8524
	SRR1633095	18dpa	0.4429	86115698	80685632	0.9618	0.8866	8.11	68694325	0.8514
	SRR1633096	18dpa	0.4457	69653312	66230424	0.9708	0.9018	6.66	55842749	0.8432
	SRR1633097	18dpa	0.444	70151138	64791666	0.9566	0.8754	6.51	54769584	0.8453
	SRR1633098	18dpa	0.4445	69664406	64790074	0.961	0.8853	6.51	54677333	0.8439
	SRR1635404	15dpa	0.4426	95915122	88970206	0.9665	0.8926	8.96	76487461	0.8597
	SRR1635406	15dpa	0.4405	96988030	88664180	0.96	0.8802	8.93	76411890	0.8618
PRJNA326737	SRR3715274	8dpa	0.4348	47525540	41027730	0.9491	0.8686	4.11	32580935	0.7941
	SRR3715275	8dpa	0.3819	44180114	37063178	0.9496	0.8679	3.71	29819088	0.8045
	SRR3715276	20dpa	0.4321	99087724	90570420	0.9638	0.8913	9.05	76901257	0.8491
	SRR3715277	20dpa	0.4316	115128974	95094674	0.9791	0.9257	9.46	89396581	0.9401
PRJNA436644	SRR6798282	19dpa	0.4686	77085120	60475984	0.9715	0.9091	6.04	47633859	0.7876
	SRR6798286	13dpa	0.484	86659074	65327528	0.9309	0.8002	6.53	45743561	0.7002
PRJNA490626	SRR8090004	20dpa	0.4646	40950220	40946608	0.9882	0.967	6.03	32706894	0.7988
	SRR8090006	20dpa	0.4546	71444252	71440996	0.993	0.9789	10.56	59828861	0.8375
	SRR8090007	20dpa	0.4469	50844724	50840508	0.9886	0.9681	7.49	42852835	0.8429
	SRR8090010	25dpa	0.4558	57435084	56135636	0.9582	0.9037	8.41	42734620	0.7613
	SRR8090042	10dpa	0.4441	44016876	44012178	0.9835	0.946	6.34	38715605	0.8797	Clustered into 15 dpa fiber samples in tSNE
	SRR8090044	10dpa	0.4487	48532904	48528458	0.9837	0.946	7.1	41947822	0.8644	Clustered into 15 dpa fiber samples in tSNE
	SRR8090046	15dpa	0.4638	55921468	54498714	0.9595	0.9053	8.2	43672669	0.8014
	SRR8090049	15dpa	0.4665	52951416	51943358	0.9634	0.9137	7.82	39411635	0.7587
	SRR8090050	15dpa	0.4623	50428300	49471650	0.9627	0.9121	7.45	39292505	0.7942
PRJNA508480	SRR8289729	15dpa	0.469	38672258	38226016	0.9772	0.952	4.77	29115840	0.7617
	SRR8289730	20dpa	0.4679	45518494	44709670	0.9742	0.9467	5.55	35485102	0.7937
	SRR8289731	20dpa	0.4506	42937640	42244504	0.9716	0.9417	5.25	37306361	0.8831
	SRR8289733	25pda	0.4501	71047818	69574460	0.9733	0.9458	8.6	59933581	0.8614
	SRR8289734	25pda	0.4504	51895808	51096076	0.9768	0.9519	6.32	44250065	0.866
	SRR8289735	25pda	0.4683	56306994	55610184	0.9773	0.9523	6.92	41147009	0.7399
	SRR8289736	30dpa	0.4694	47468590	46667130	0.9701	0.9382	5.8	35583447	0.7625
	SRR8289737	30dpa	0.4715	44743330	44180270	0.9779	0.9533	5.49	33333379	0.7545
	SRR8289741	10dpa	0.4633	41936258	41274940	0.9737	0.9453	5.16	34772684	0.8425
	SRR8289742	30dpa	0.456	53973266	53267808	0.9776	0.9528	6.62	44984286	0.8445
	SRR8289743	10dpa	0.4605	57989328	57245106	0.976	0.95	7.15	47649605	0.8324
	SRR8289744	10dpa	0.4485	53099082	52297710	0.9739	0.9462	6.53	46951710	0.8978
	SRR8289745	25pda	0.4422	54007110	52371024	0.9575	0.9141	6.53	48395661	0.9241
	SRR8289746	25pda	0.4554	45699618	45090190	0.9778	0.9533	5.59	38827095	0.8611
	SRR8289747	30dpa	0.456	53973266	53241482	0.9751	0.9479	6.62	45356975	0.8519
	SRR8289748	30dpa	0.4544	67140584	65990284	0.9698	0.9379	8.21	56435620	0.8552
	SRR8289749	20dpa	0.4531	68147156	67153478	0.9734	0.9452	8.35	59190100	0.8814
	SRR8289750	20dpa	0.4598	47405040	46609508	0.9699	0.938	5.81	40147847	0.8614
	SRR8289751	15dpa	0.4556	48788206	48104666	0.9747	0.9465	6	41913101	0.8713
	SRR8289752	15dpa	0.4479	57026922	56151200	0.9733	0.9452	7.01	50139139	0.8929
	SRR8289753	15dpa	0.4553	45053602	44323924	0.9728	0.9438	5.53	39171068	0.8837
	SRR8289754	10dpa	0.4648	56318960	55616896	0.9764	0.9507	6.95	43466918	0.7815
	SRR8289755	10dpa	0.4578	49319074	48602156	0.9738	0.9458	6.07	41184968	0.8474
	SRR8289756	10dpa	0.4544	46956068	46167468	0.9719	0.9422	5.76	40665297	0.8808
	SRR8289757	25pda	0.4539	41531996	40811492	0.9705	0.9394	5.06	35160025	0.8615
PRJNA529497	SRR8797003	20dpa	0.4566	19370350	19361404	0.9615	0.9023	2.89	15949131	0.8238
	SRR8797004	10dpa	0.4522	20053130	20046664	0.9615	0.9039	3	17038921	0.85
	SRR8797005	20dpa	0.4524	21556370	21547274	0.9637	0.9069	3.22	18244870	0.8467
	SRR8797006	10dpa	0.4591	21481040	21471762	0.9633	0.9058	3.21	17258769	0.8038
	SRR8797007	20dpa	0.451	22988758	22978528	0.9636	0.9065	3.43	19326717	0.8411
	SRR8797008	10dpa	0.4501	20221134	20212292	0.9598	0.898	3.02	17170728	0.8495
	SRR8797009	20dpa	0.4587	17970760	17961972	0.9674	0.9146	2.68	14993657	0.8347
	SRR8797010	10dpa	0.4541	21513176	21507122	0.9626	0.906	3.21	18450080	0.8579
	SRR8797011	20dpa	0.4568	20357536	20348432	0.9597	0.8985	3.04	16923284	0.8317
	SRR8797012	10dpa	0.4493	20000580	19994132	0.962	0.9054	2.99	16930913	0.8468
	SRR8797013	10dpa	0.4569	22619822	22611906	0.9621	0.9056	3.38	18298047	0.8092
	SRR8797015	10dpa	0.4569	19943518	19936306	0.9675	0.9169	2.98	16446600	0.825
	SRR8797017	10dpa	0.4523	22413514	22401512	0.9505	0.8814	3.35	18442847	0.8233
	SRR8797019	20dpa	0.446	55400580	53831218	0.9664	0.917	8.02	42561668	0.7907
	SRR8797020	10dpa	0.4457	42105942	41254764	0.9711	0.927	6.17	35096500	0.8507
	SRR8797021	20dpa	0.4552	19293174	19286366	0.9597	0.9003	2.88	16049301	0.8322
	SRR8797022	10dpa	0.452	21546448	21539148	0.9646	0.9104	3.22	18552413	0.8613
	SRR8797024	10dpa	0.4511	22748404	22740606	0.9623	0.9061	3.4	19178813	0.8434	Clustered into 15 dpa fiber samples in tSNE
	SRR8797025	20dpa	0.4567	20091960	20084878	0.9525	0.8852	2.99	16480328	0.8205
	SRR8797026	10dpa	0.4511	21186486	21179018	0.9619	0.9055	3.16	17785322	0.8398
	SRR8797027	20dpa	0.4545	21560550	21550758	0.9622	0.9042	3.22	17961909	0.8335
	SRR8797028	10dpa	0.4508	21631922	21625392	0.9638	0.9101	3.23	18055369	0.8349
	SRR8797029	20dpa	0.4548	19972608	19966316	0.9606	0.903	2.98	16613989	0.8321
	SRR8797030	10dpa	0.4491	19679124	19672110	0.9639	0.9091	2.94	16717904	0.8498
PRJNA634606	SRR12077547	5dpa	0.4436	115165576	113532198	0.9809	0.9427	16.99	91718297	0.8079
	SRR12077561	25dpa	0.4625	112029574	110996194	0.975	0.9329	16.6	82919636	0.747	Clustered into 5-15 dpa fiber samples in tSNE
	SRR12077563	20dpa	0.4757	141506954	141127820	0.9857	0.9536	21.1	110393524	0.7822	Clustered into 5-15 dpa fiber samples in tSNE
	SRR12077564	20dpa	0.4737	148691616	148277346	0.9857	0.9538	22.17	115289403	0.7775	Clustered into 5-15 dpa fiber samples in tSNE
	SRR12077565	20dpa	0.4733	144076076	143723892	0.9862	0.9551	21.48	112247957	0.781	Clustered into 5-15 dpa fiber samples in tSNE
	SRR12077570	10dpa	0.4518	110561938	109248152	0.9831	0.9488	16.34	87815496	0.8038
	SRR12077571	10dpa	0.4543	166569410	164531050	0.981	0.9433	24.59	133915355	0.8139
	SRR12077572	10dpa	0.4557	155672314	153703792	0.9824	0.9469	22.99	127037333	0.8265
	SRR12077573	5dpa	0.4437	145336028	143350550	0.9803	0.9413	21.44	117888008	0.8224
	SRR12077574	5dpa	0.4427	161659920	159033302	0.9778	0.9351	23.76	129423937	0.8138
	SRR12077575	5dpa	0.4413	161177666	159075584	0.983	0.9483	23.74	131768664	0.8283
	SRR12077596	25dpa	0.4749	110465568	109252018	0.9746	0.9331	16.33	78700539	0.7204	Clustered into 5-15 dpa fiber samples in tSNE
	SRR12077599	20dpa	0.4754	155495548	154942092	0.984	0.9493	23.19	117322436	0.7572	Clustered into 5-15 dpa fiber samples in tSNE
	SRR12077601	20dpa	0.4749	211263186	210671902	0.9857	0.9537	31.53	161998798	0.769	Clustered into 5-15 dpa fiber samples in tSNE
	SRR12077602	20dpa	0.4701	185462888	185014890	0.9858	0.9537	27.67	146166245	0.79	Clustered into 5-15 dpa fiber samples in tSNE
	SRR12077604	15dpa	0.4498	111779598	111295200	0.9852	0.9524	16.65	92461368	0.8308	Clustered into 10 dpa fiber samples in tSNE
	SRR12077606	10dpa	0.4604	158899350	157016414	0.983	0.9486	23.5	127697755	0.8133
	SRR12077607	10dpa	0.4464	124995930	123354392	0.9811	0.9435	18.44	98995710	0.8025
	SRR12077608	10dpa	0.4567	123592704	121894020	0.9794	0.939	18.24	99383507	0.8153
	SRR12077609	5dpa	0.4422	134329358	132456552	0.9824	0.947	19.82	105685297	0.7979
	SRR12077610	5dpa	0.4403	125265874	123637606	0.9823	0.9465	18.5	99811638	0.8073
PRJNA433615	SRR10282153	15dpa	0.4428	89670060	89670060	0.9755	0.9283	13.43	81157496	0.9051
	SRR10282154	15dpa	0.4425	72783526	72783526	0.9767	0.9308	10.9	65809736	0.9042
	SRR10282155	15dpa	0.4441	75078900	75078900	0.9719	0.9211	11.24	66508618	0.8858
	SRR10282156	15dpa	0.4423	81943944	81943944	0.9748	0.9266	12.28	74116940	0.9045
	SRR10282157	15dpa	0.4444	91621450	91621448	0.9769	0.9333	13.72	80711537	0.8809
	SRR10282158	15dpa	0.4432	81328488	81328488	0.9719	0.9204	12.18	73516034	0.9039
	SRR10282159	15dpa	0.4442	74118896	74118168	0.9758	0.9335	11.09	64420811	0.8692
	SRR10282160	15dpa	0.4438	92206744	92206744	0.9742	0.9288	13.8	83283332	0.9032
	SRR10282161	15dpa	0.4432	77016242	77016242	0.9728	0.923	11.53	69224704	0.8988
	SRR10282162	15dpa	0.4436	74285712	74284538	0.975	0.9316	11.12	64910900	0.8738
	SRR10282163	15dpa	0.4447	78153022	78153022	0.9741	0.9255	11.69	70085687	0.8968
	SRR10282164	15dpa	0.4436	89181226	89181226	0.9692	0.9148	13.36	80263674	0.9
	SRR10282165	15dpa	0.4447	74368550	74349706	0.9862	0.9591	11.13	65042564	0.8748
	SRR10282166	15dpa	0.4447	70353732	70353732	0.9743	0.925	10.54	62250134	0.8848
	SRR10282167	15dpa	0.4444	71236604	71236604	0.9749	0.9273	10.66	63087838	0.8856
	SRR10282168	15dpa	0.4438	72226418	72225002	0.9757	0.9332	10.82	63090835	0.8735
	SRR10282169	15dpa	0.4424	73832950	73814830	0.9856	0.9579	11.06	65057072	0.8814
	SRR10282170	15dpa	0.4466	74400488	74395070	0.9843	0.9538	11.14	64429337	0.866
	SRR10282171	15dpa	0.4422	77689944	77689944	0.9743	0.926	11.63	69846368	0.899
	SRR10282172	15dpa	0.4438	83252704	83252704	0.9731	0.9278	12.47	73907144	0.8877
	SRR10282173	15dpa	0.4439	78889584	78889584	0.9742	0.9307	11.81	67071856	0.8502
	SRR10282174	15dpa	0.4442	74570280	74570280	0.9694	0.9158	11.17	67352779	0.9032
	SRR10282175	15dpa	0.444	76470894	76470894	0.976	0.9294	11.45	68883138	0.9008
	SRR10282176	15dpa	0.4431	77402736	77402736	0.971	0.9199	11.59	69406954	0.8967
	SRR10282177	15dpa	0.4443	74485406	74483466	0.9855	0.9571	11.16	65947949	0.8854
	SRR10282178	15dpa	0.4432	77724264	77724264	0.9719	0.9213	11.64	70140091	0.9024
	SRR10282179	15dpa	0.4434	86821904	86821904	0.9731	0.9269	12.99	73418445	0.8456
	SRR10282180	15dpa	0.4428	74876348	74876348	0.969	0.9148	11.21	67712514	0.9043
	SRR10282181	15dpa	0.4449	73436838	73434624	0.9851	0.9563	11	64921913	0.8841
	SRR10282182	15dpa	0.4437	83869826	83869826	0.9717	0.9207	12.56	75742537	0.9031
	SRR10282183	15dpa	0.4448	83855604	83855604	0.9726	0.9251	12.55	71423852	0.8517
	SRR10282184	15dpa	0.4424	100008278	100008278	0.9768	0.9311	14.98	89233762	0.8923
	SRR10282185	15dpa	0.4433	74755536	74750548	0.9854	0.9568	11.19	66186427	0.8854
	SRR10282186	15dpa	0.4437	75852732	75852732	0.9687	0.9146	11.36	68824778	0.9073
	SRR10282187	15dpa	0.4442	70896732	70896732	0.9711	0.9184	10.62	64103811	0.9042
	SRR10282188	15dpa	0.4449	91932232	91932232	0.9759	0.9345	13.77	81576087	0.8874
	SRR10282189	15dpa	0.4451	98450126	98450126	0.9742	0.9301	14.75	88055745	0.8944
	SRR10282190	15dpa	0.4425	82622180	82622180	0.9723	0.921	12.38	73337413	0.8876
	SRR10282191	15dpa	0.4453	84588888	84588888	0.9754	0.9283	12.67	76003105	0.8985
	SRR10282192	15dpa	0.4432	89021458	89021458	0.9749	0.9275	13.34	79217417	0.8899
	SRR10282193	15dpa	0.4449	90494620	90494620	0.9762	0.9311	13.53	81353551	0.899
	SRR10282194	15dpa	0.4443	74174958	74173148	0.9819	0.9484	11.11	65516590	0.8833
	SRR10282195	15dpa	0.4425	120008776	120008776	0.9778	0.9369	17.97	105873466	0.8822
	SRR10282196	15dpa	0.4438	74063784	74058784	0.9845	0.9543	11.09	63364196	0.8556
	SRR10282197	15dpa	0.4433	80768190	80768190	0.9687	0.9131	12.09	72362367	0.8959
	SRR10282198	15dpa	0.4486	73874116	73872054	0.9861	0.9588	11.05	62472386	0.8457
	SRR10282199	15dpa	0.4429	69721928	69721928	0.9747	0.9269	10.44	62546241	0.8971
	SRR10282200	15dpa	0.445	78477242	78477242	0.9708	0.918	11.75	70502681	0.8984
	SRR10282201	15dpa	0.4416	75207600	75207600	0.9717	0.9205	11.26	66974642	0.8905
	SRR10282202	15dpa	0.4426	77269162	77269162	0.9722	0.9207	11.57	69756255	0.9028
	SRR10282203	15dpa	0.4437	93502652	93502652	0.9728	0.9257	13.99	84830846	0.9073
	SRR10282204	15dpa	0.4442	87198360	87198360	0.9733	0.927	13.05	74611355	0.8557
	SRR10282205	15dpa	0.4424	70631038	70631038	0.9756	0.9287	10.57	62901191	0.8906
	SRR10282206	15dpa	0.4437	91703596	91703596	0.9759	0.9305	13.74	82054227	0.8948
	SRR10282207	15dpa	0.445	102540748	102540748	0.9743	0.9308	15.36	90272686	0.8804
	SRR10282208	15dpa	0.4443	79804242	79804242	0.9743	0.9303	11.95	70269374	0.8805
	SRR10282209	15dpa	0.4417	74354422	74354422	0.9719	0.9215	11.14	66743326	0.8976
	SRR10282210	15dpa	0.445	71957366	71957366	0.976	0.9293	10.78	64121208	0.8911
	SRR10282211	15dpa	0.4433	67395484	67395484	0.9712	0.9195	10.09	59774201	0.8869
	SRR10282212	15dpa	0.4446	90030398	90030398	0.9733	0.9283	13.49	79967561	0.8882
	SRR10282213	15dpa	0.4487	73762144	73759652	0.9831	0.9504	11.04	62572246	0.8483
	SRR10282214	15dpa	0.4431	91779528	91779528	0.9791	0.9401	13.74	80725577	0.8796
	SRR10282215	15dpa	0.4425	72825898	72825898	0.9701	0.9176	10.9	65464908	0.8989
	SRR10282216	15dpa	0.4442	73811368	73810698	0.9766	0.9356	11.05	64367377	0.8721
	SRR10282217	15dpa	0.4442	76072848	76072848	0.9742	0.9257	11.38	68736018	0.9036
	SRR10282218	15dpa	0.4425	81090156	81090156	0.9735	0.9242	12.13	73001179	0.9002
	SRR10282219	15dpa	0.444	93238038	93238038	0.9745	0.927	13.94	83818218	0.899
	SRR10282220	15dpa	0.4453	77816626	77816626	0.9736	0.9246	11.65	70299077	0.9034
	SRR10282221	15dpa	0.4474	74653992	74651020	0.9857	0.9574	11.17	64481730	0.8638
	SRR10282222	15dpa	0.4434	98728600	98728600	0.9766	0.9317	14.76	88443660	0.8958
	SRR10282223	15dpa	0.4448	82458084	82458084	0.9715	0.9209	12.35	74600047	0.9047
	SRR10282224	15dpa	0.4442	73729962	73728032	0.9857	0.9576	11.04	65369316	0.8866
	SRR10282225	15dpa	0.4432	74866824	74866824	0.9711	0.9187	11.2	66402032	0.8869
	SRR10282226	15dpa	0.4432	86104422	86104422	0.9795	0.9409	12.89	76255073	0.8856
	SRR10282227	15dpa	0.4443	70034158	70034156	0.9732	0.924	10.48	62991862	0.8994
	SRR10282228	15dpa	0.4429	68560700	68560700	0.9746	0.9268	10.26	60579886	0.8836
	SRR10282229	15dpa	0.4423	94924708	94924708	0.9732	0.927	14.21	80437119	0.8474
	SRR10282230	15dpa	0.4428	71280244	71280244	0.9752	0.9278	10.68	64297232	0.902
	SRR10282231	15dpa	0.4431	75155380	75155380	0.9744	0.9262	11.25	67703648	0.9008
	SRR10282232	15dpa	0.4424	80599146	80599146	0.9664	0.9088	12.07	71304640	0.8847
	SRR10282233	15dpa	0.445	80638946	80638946	0.9749	0.9276	12.08	72900545	0.904
	SRR10282234	15dpa	0.4429	74267002	74264788	0.9821	0.9486	11.12	66067078	0.8896
	SRR10282235	15dpa	0.4455	74942840	74942840	0.9767	0.9322	11.22	66657549	0.8894
	SRR10282236	15dpa	0.4453	100747164	100747164	0.9754	0.9333	15.07	85861544	0.8522
	SRR10282237	15dpa	0.4439	78545668	78545668	0.9741	0.9262	11.76	69987009	0.891
	SRR10282238	15dpa	0.4435	98791360	98791358	0.977	0.9326	14.79	88870029	0.8996
	SRR10282239	15dpa	0.4472	74342152	74322818	0.9866	0.9601	11.13	65064810	0.8754
	SRR10282240	15dpa	0.4421	99919726	99919726	0.977	0.9322	14.97	90033169	0.9011
	SRR10282241	15dpa	0.4421	73931804	73929732	0.9818	0.9483	11.08	65485707	0.8858
	SRR10282242	15dpa	0.4436	97314952	97314952	0.974	0.9287	14.56	87528112	0.8994
	SRR10282243	15dpa	0.4427	72320162	72320160	0.9705	0.9176	10.83	64230298	0.8881
	SRR10282244	15dpa	0.4456	72875716	72875716	0.9719	0.9208	10.91	64395305	0.8836
	SRR10282245	15dpa	0.4451	95205516	95205516	0.9756	0.9337	14.25	82004058	0.8613
	SRR10282246	15dpa	0.4443	79721016	79721016	0.9725	0.9218	11.94	72169696	0.9053
	SRR10282247	15dpa	0.4461	87499340	87499340	0.9748	0.9316	13.11	77167958	0.8819
	SRR10282248	15dpa	0.4431	70833402	70833402	0.9742	0.9258	10.6	62718250	0.8854
	SRR10282249	15dpa	0.4439	90954174	90954174	0.9731	0.9243	13.62	81889383	0.9003
	SRR10282250	15dpa	0.4483	73843890	73842382	0.9858	0.958	11.05	63283341	0.857
	SRR10282251	15dpa	0.4446	92285594	92285594	0.9732	0.9284	13.82	81947977	0.888
	SRR10282252	15dpa	0.4448	89217804	89217804	0.9719	0.9243	13.36	76507409	0.8575
	SRR10282253	15dpa	0.444	83405878	83405878	0.9726	0.9217	12.49	75165510	0.9012
	SRR10282254	15dpa	0.4422	76631328	76631328	0.9725	0.9228	11.47	67839338	0.8853
	SRR10282255	15dpa	0.4449	81534106	81534106	0.9729	0.9232	12.21	72820441	0.8931
	SRR10282256	15dpa	0.445	68990844	68990844	0.9719	0.9208	10.32	60858348	0.8821
	SRR10282257	15dpa	0.4404	84087728	84087728	0.974	0.9257	12.59	75356982	0.8962
	SRR10282258	15dpa	0.4421	75459820	75459820	0.9734	0.9252	11.29	66985544	0.8877
	SRR10282259	15dpa	0.4433	73763522	73763522	0.9757	0.9294	11.05	65407247	0.8867
	SRR10282260	15dpa	0.4429	74777622	74777622	0.9729	0.9234	11.2	59772374	0.7993
	SRR10282261	15dpa	0.4438	105857044	105857044	0.9743	0.9258	15.85	94995445	0.8974
	SRR10282262	15dpa	0.4451	75082550	75082550	0.9727	0.9255	11.24	63903300	0.8511
	SRR10282263	15dpa	0.4457	74392672	74387262	0.9845	0.9543	11.14	65090049	0.875
	SRR10282264	15dpa	0.4431	77849268	77849268	0.972	0.921	11.66	69269525	0.8898
	SRR10282265	15dpa	0.4425	73856234	73853406	0.986	0.9579	11.06	65374545	0.8852
	SRR10282266	15dpa	0.4415	79183864	79183864	0.9724	0.9219	11.86	71721675	0.9058
	SRR10282267	15dpa	0.4438	74325182	74323284	0.9825	0.9501	11.13	65592318	0.8825
	SRR10282268	15dpa	0.4472	74611704	74608930	0.9867	0.9602	11.17	64359420	0.8626
	SRR10282269	15dpa	0.4454	98218706	98218706	0.9759	0.9296	14.71	88575091	0.9018
	SRR10282270	15dpa	0.4437	68255674	68255674	0.9747	0.9265	10.22	60620755	0.8881
	SRR10282271	15dpa	0.4425	69274332	69274332	0.9711	0.919	10.38	61825460	0.8925
	SRR10282272	15dpa	0.4433	90112282	90112282	0.9731	0.9233	13.5	81437553	0.9037
	SRR10282273	15dpa	0.4446	90475122	90475122	0.9739	0.9299	13.54	77774380	0.8596
	SRR10282274	15dpa	0.4431	71871816	71871816	0.9718	0.9199	10.77	63998186	0.8904
	SRR10282275	15dpa	0.4441	86544708	86544708	0.9738	0.9282	12.95	73702311	0.8516
	SRR10282276	15dpa	0.4435	70316750	70316750	0.9763	0.9307	10.53	62521024	0.8891
	SRR10282277	15dpa	0.4432	74771318	74770658	0.976	0.9342	11.19	64678727	0.865
	SRR10282278	15dpa	0.4423	81289410	81289410	0.9731	0.9234	12.18	73467762	0.9038
	SRR10282279	15dpa	0.4429	67580536	67580536	0.9712	0.9192	10.12	59950686	0.8871
	SRR10282280	15dpa	0.4458	71391976	71391976	0.9737	0.9244	10.68	64115065	0.8981
	SRR10282281	15dpa	0.4433	92308646	92308646	0.9726	0.9257	13.81	77086837	0.8351
	SRR10282282	15dpa	0.4429	89055004	89055004	0.9737	0.9256	13.34	79340734	0.8909
	SRR10282283	15dpa	0.444	76476568	76476568	0.9726	0.9227	11.44	68909303	0.9011
	SRR10282284	15dpa	0.4449	82590978	82590978	0.9719	0.9215	12.37	74162350	0.8979
	SRR10282285	15dpa	0.4451	92035702	92035702	0.9731	0.9267	13.78	79017920	0.8586
	SRR10282286	15dpa	0.4469	73675508	73653928	0.9871	0.961	11.03	64871624	0.8808
	SRR10282287	15dpa	0.4442	87014452	87014452	0.974	0.9258	13.03	76749661	0.882
	SRR10282288	15dpa	0.4454	74774360	74773248	0.9753	0.9323	11.19	64916073	0.8682
	SRR10282289	15dpa	0.444	92921894	92921894	0.9756	0.9285	13.92	82868155	0.8918
	SRR10282290	15dpa	0.4409	94831634	94831634	0.9753	0.9296	14.2	84421899	0.8902
	SRR10282291	15dpa	0.4419	76484772	76484772	0.9733	0.9268	11.45	69049820	0.9028
	SRR10282292	15dpa	0.4445	90306972	90306972	0.9753	0.9282	13.52	81561625	0.9032
	SRR10282293	15dpa	0.4445	68070156	68070156	0.9752	0.9277	10.19	60415736	0.8876
	SRR10282294	15dpa	0.4433	74314966	74312988	0.986	0.9586	11.13	63891626	0.8598
	SRR10282295	15dpa	0.4451	98070850	98070850	0.9746	0.9308	14.69	87540073	0.8926
	SRR10282296	15dpa	0.4453	82508178	82508178	0.9725	0.9221	12.36	74140425	0.8986
	SRR10282297	15dpa	0.4412	98087714	98087714	0.9746	0.9311	14.69	86871957	0.8857
	SRR10282298	15dpa	0.4451	73535500	73535500	0.9733	0.9269	11.01	61981596	0.8429
	SRR10282299	15dpa	0.4439	87644960	87644960	0.9728	0.9223	13.12	79059887	0.902
	SRR10282300	15dpa	0.4448	98405826	98405826	0.9747	0.9317	14.73	84714949	0.8609
	SRR10282301	15dpa	0.4441	79047170	79047170	0.9741	0.9253	11.84	70206994	0.8882
	SRR10282302	15dpa	0.4444	112221308	112221308	0.9791	0.9397	16.8	98857849	0.8809
	SRR10282303	15dpa	0.4423	74091464	74089280	0.9861	0.9589	11.09	63585014	0.8582
	SRR10282304	15dpa	0.4468	75183662	75183662	0.9692	0.9145	11.26	67518916	0.8981
	SRR10282305	15dpa	0.4402	78100408	78100408	0.9727	0.9258	11.69	66381562	0.85
	SRR10282306	15dpa	0.4444	87908836	87908836	0.9743	0.926	13.17	78652429	0.8947
	SRR10282307	15dpa	0.4437	83483278	83483278	0.971	0.9189	12.5	74983406	0.8982
	SRR10282308	15dpa	0.4417	69162320	69162320	0.9682	0.9128	10.36	61874379	0.8946
	SRR10282309	15dpa	0.4425	75299528	75299528	0.9704	0.9179	11.28	67956975	0.9025
	SRR10282310	15dpa	0.4444	75753164	75753164	0.9716	0.9193	11.35	67025745	0.8848
	SRR10282311	15dpa	0.444	71717920	71717920	0.9702	0.9169	10.73	63738708	0.8887
	SRR10282312	15dpa	0.4428	71699704	71699704	0.9735	0.9241	10.72	64486437	0.8994
	SRR10282313	15dpa	0.4452	80309542	80309542	0.9747	0.9266	12.02	70871933	0.8825
	SRR10282314	15dpa	0.4445	70037624	70037624	0.9687	0.9144	10.49	63168748	0.9019
	SRR10282315	15dpa	0.4435	102037404	102037404	0.973	0.9264	15.28	87022442	0.8528
	SRR10282316	15dpa	0.4427	86473724	86473724	0.9759	0.9297	12.94	75861146	0.8773
	SRR10282317	15dpa	0.4425	91519722	90394402	0.9725	0.9284	13.53	82517064	0.9129
	SRR10282318	15dpa	0.4434	80856134	80856134	0.9715	0.9204	12.11	73106335	0.9042
	SRR10282319	15dpa	0.4424	74103952	74103952	0.9719	0.9207	11.09	65613214	0.8854
	SRR10282320	15dpa	0.4439	74622360	74622360	0.974	0.9255	11.18	66130948	0.8862
	SRR10282321	15dpa	0.4443	86898586	86898586	0.9763	0.9308	13.01	78213217	0.9001
	SRR10282322	15dpa	0.4448	74323038	74321066	0.9824	0.9494	11.13	65629360	0.8831
	SRR10282323	15dpa	0.4429	78129978	78129978	0.9721	0.9221	11.7	70506005	0.9024
	SRR10282324	15dpa	0.4435	107018586	107018586	0.9765	0.9356	16.01	92556223	0.8649
	SRR10282325	15dpa	0.4444	79416288	79416288	0.9731	0.923	11.88	70340554	0.8857
	SRR10282326	15dpa	0.445	74662592	74660626	0.9858	0.9581	11.18	65341930	0.8752
	SRR10282327	15dpa	0.4435	90787880	90787880	0.9743	0.9306	13.6	81002209	0.8922
	SRR10282328	15dpa	0.4431	100085504	100085504	0.9733	0.9266	14.98	89996112	0.8992
	SRR10282329	15dpa	0.4449	86908242	86908242	0.9763	0.9307	13.01	78321746	0.9012
	SRR10282330	15dpa	0.4432	96512616	96512616	0.973	0.9267	14.45	81436150	0.8438
	SRR10282331	15dpa	0.4445	88279894	88279894	0.9731	0.9235	13.22	79755622	0.9034
	SRR10282332	15dpa	0.4442	105972262	105972260	0.9783	0.9381	15.87	93425441	0.8816
	SRR10282333	15dpa	0.4443	73408676	73405912	0.9854	0.9567	10.99	64649791	0.8807
	SRR10282334	15dpa	0.4452	71763104	71763104	0.9748	0.928	10.75	63555071	0.8856
	SRR10282335	15dpa	0.4462	113100892	113100892	0.9741	0.9305	16.93	97718327	0.864
	SRR10282336	15dpa	0.4486	74764058	74761886	0.9857	0.9577	11.19	64163808	0.8582
	SRR10282337	15dpa	0.4434	82151638	82151638	0.9719	0.9206	12.3	73907940	0.8997
	SRR10282338	15dpa	0.4412	68893890	68893890	0.9695	0.9157	10.32	62138564	0.9019
	SRR10282339	15dpa	0.4439	85480288	85480288	0.9753	0.9282	12.8	76115424	0.8904
	SRR10282340	15dpa	0.4452	69365000	69365000	0.9746	0.9258	10.39	61643408	0.8887
	SRR10282341	15dpa	0.4436	79684214	79684214	0.9727	0.926	11.93	67944559	0.8527
	SRR10282342	15dpa	0.4432	77829596	77829596	0.9754	0.9284	11.66	69345841	0.891
	SRR10282343	15dpa	0.4441	67376276	67376276	0.9686	0.9133	10.09	59671121	0.8856
	SRR10282344	15dpa	0.4428	88976092	88976092	0.9746	0.9269	13.32	80099091	0.9002
	SRR10282345	15dpa	0.441	81947288	81947288	0.9671	0.9102	12.27	73607392	0.8982
	SRR10282346	15dpa	0.4426	67752660	67752660	0.9722	0.9215	10.14	59955360	0.8849
	SRR10282347	15dpa	0.4428	85532574	85532574	0.9725	0.9227	12.81	77145346	0.9019
	SRR10282348	15dpa	0.4429	104570584	104570584	0.972	0.924	15.65	94252608	0.9013
	SRR10282349	15dpa	0.4448	96310854	96310854	0.9741	0.9301	14.43	85440440	0.8871
	SRR10282350	15dpa	0.4428	69131804	69131804	0.9749	0.9272	10.34	61002056	0.8824
	SRR10282351	15dpa	0.4447	70042862	70042862	0.9717	0.9204	10.49	62275984	0.8891
	SRR10282352	15dpa	0.443	75224870	75224870	0.9744	0.9263	11.26	66936184	0.8898
	SRR10282353	15dpa	0.4428	104632712	104632712	0.9748	0.9306	15.66	94198500	0.9003
	SRR10282354	15dpa	0.4441	83917326	83917326	0.9715	0.9207	12.57	75771618	0.9029
	SRR10282355	15dpa	0.4376	88733190	88733190	0.9717	0.922	13.29	80272078	0.9046
	SRR10282356	15dpa	0.4444	75531654	75531654	0.9714	0.9193	11.31	67997643	0.9003
	SRR10282357	15dpa	0.444	76514684	76514684	0.9735	0.9248	11.45	68975754	0.9015
	SRR10282358	15dpa	0.443	74039466	74036572	0.9859	0.9585	11.09	65561720	0.8855
	SRR10282359	15dpa	0.4458	90178612	90178612	0.9729	0.923	13.5	81170897	0.9001
	SRR10282360	15dpa	0.4451	81164140	81164140	0.9773	0.9332	12.16	73089421	0.9005
	SRR10282361	15dpa	0.4444	75349822	75349822	0.974	0.9257	11.28	66576229	0.8836
	SRR10282362	15dpa	0.4412	72987432	72987432	0.9697	0.9158	10.93	65474048	0.8971
	SRR10282363	15dpa	0.4444	77185820	77185820	0.9728	0.9234	11.56	69632158	0.9021
	SRR10282364	15dpa	0.442	71310912	71310912	0.9692	0.915	10.68	64124108	0.8992
	SRR10282365	15dpa	0.4443	80021818	80021818	0.9735	0.9243	11.98	70572043	0.8819
	SRR10282366	15dpa	0.4446	82941034	82941034	0.9758	0.9293	12.42	74763521	0.9014
	SRR10282367	15dpa	0.4459	85765066	85765066	0.9752	0.9278	12.83	76750027	0.8949
	SRR10282368	15dpa	0.4415	90874734	90874734	0.9741	0.9264	13.61	81024896	0.8916
	SRR10282369	15dpa	0.4432	83583884	83583884	0.9759	0.9308	12.51	74480829	0.8911
	SRR10282370	15dpa	0.4439	76861042	76861042	0.9704	0.9174	11.5	67710428	0.8809
	SRR10282371	15dpa	0.4431	85431430	85431430	0.9738	0.9248	12.79	76993118	0.9012
	SRR10282372	15dpa	0.4447	86662800	86662800	0.9739	0.9263	12.98	78137592	0.9016
	SRR10282373	15dpa	0.4431	87718278	87718278	0.9723	0.9211	13.14	79111624	0.9019
	SRR10282374	15dpa	0.4441	86897706	86897706	0.9703	0.9183	13.02	77730737	0.8945
	SRR10282375	15dpa	0.448	73910080	73907100	0.9862	0.9588	11.06	63832655	0.8637
	SRR10282376	15dpa	0.4451	96569094	96569094	0.9733	0.9241	14.46	86798783	0.8988
	SRR10282377	15dpa	0.4442	74230956	74228616	0.9832	0.9514	11.12	65793711	0.8864
	SRR10282378	15dpa	0.4428	70999724	70999724	0.9745	0.9263	10.64	63005878	0.8874
	SRR10282379	15dpa	0.4431	88515868	88515868	0.969	0.9155	13.25	78251994	0.884
	SRR10282380	15dpa	0.4435	69588082	69588082	0.9729	0.9223	10.43	61913794	0.8897
	SRR10282381	15dpa	0.4446	74211228	74211228	0.9747	0.9269	11.1	66819030	0.9004
	SRR10282382	15dpa	0.4436	73781510	73760090	0.9876	0.9628	11.03	64777701	0.8782
	SRR10282383	15dpa	0.4441	92609160	92609160	0.9764	0.9353	13.86	79638891	0.8599
	SRR10282384	15dpa	0.4441	80282362	80282362	0.974	0.9263	12.02	71281106	0.8879
	SRR10282385	15dpa	0.4432	73776000	73770888	0.984	0.953	11.05	64886650	0.8796
	SRR10282386	15dpa	0.4473	93971754	93971754	0.976	0.9345	14.06	81071285	0.8627
	SRR10282387	15dpa	0.4435	68456534	68456534	0.9747	0.9266	10.25	60723912	0.887
	SRR10282388	15dpa	0.4445	74683526	74680640	0.9845	0.9546	11.19	66120326	0.8854
	SRR10282389	15dpa	0.4441	80076484	80076484	0.9717	0.9201	11.99	72574055	0.9063
	SRR10282390	15dpa	0.4443	74096968	74095044	0.9821	0.949	11.1	65398518	0.8826
	SRR10282391	15dpa	0.4418	91747396	91747396	0.9724	0.9229	13.74	82848140	0.903
	SRR10282392	15dpa	0.4444	72614928	72614928	0.9707	0.9177	10.87	65649758	0.9041
	SRR10282393	15dpa	0.4448	73846650	73845792	0.976	0.9341	11.05	64344703	0.8713
	SRR10282394	15dpa	0.444	76419736	76419736	0.9744	0.9268	11.44	67704240	0.886
	SRR10282395	15dpa	0.4446	74729936	74727956	0.9863	0.9592	11.19	65994014	0.8831
	SRR10282396	15dpa	0.445	73371330	73371330	0.9719	0.9241	10.98	62296621	0.8491
	SRR10282397	15dpa	0.4433	78583600	78583600	0.9729	0.9239	11.76	70704682	0.8997
	SRR10282398	15dpa	0.4431	79619736	79619736	0.9711	0.9199	11.93	71728150	0.9009
	SRR10282399	15dpa	0.4434	70690940	70690940	0.9755	0.9283	10.59	63748199	0.9018
	SRR10282400	15dpa	0.4438	74772190	74770350	0.9854	0.957	11.2	66146806	0.8847
	SRR10282401	15dpa	0.4457	80242104	80242104	0.9714	0.9206	12.02	72002408	0.8973
	SRR10282402	15dpa	0.4454	91490736	91490736	0.9748	0.9316	13.7	81161126	0.8871
	SRR10282403	15dpa	0.4415	74151388	74151388	0.9731	0.9236	11.11	66394649	0.8954

## Sheet: Supplementary Table 3
Supplementary Table 3. A curated list of 192 fiber-related genes with known functions.
Gene	Anno	Known expression pattern	Expression pattern in this study	References
Gohir.D02G094100	GhBES1	Elongation	Elongation	Zhu et al., (2023)
Gohir.A05G196300	GhBES1.4/GhBZR1	Elongation	Elongation	Zhou et al.(2014) Liu et al ., (2022)
Gohir.A11G030701	GhTCP14	Elongation	Elongation	Wang et al. (2013)
Gohir.A04G037900	GhTCP4	Elongation	Elongation	Cao et al. (2020)
Gohir.D12G168800	GbTCP	Elongation	Elongation	Hao et al. (2012)
Gohir.A10G033800	GhBZR3	Initiation	SCW biosynthesis	Shi et al. (2022)
Gohir.D12G186300	GbTCP5	SCW biosynthesis (Gb)	Elongation and SCW biosynthesis	Wang et al. (2020)
Gohir.A11G038500	GhARF2b	Elongation and SCW biosynthesis	Elongation	Zhang et al.(2021)
Gohir.D09G111400	GhMYB46_D9	SCW biosynthesis (5, 10,20 and 25 dpa)	SCW biosynthesis	Huang et al. (2019)
Gohir.D11G051200	GhMYB44	Elongation and SCW biosynthesis	SCW biosynthesis	Xing et al., (2023)
Gohir.D11G249900	GhNAC100-2	Elongation and SCW biosynthesis	Elongation	Zhang et al.(2022)
Gohir.A12G116300	GhFSN1(NAC)	SCW biosynthesis	SCW biosynthesis	Zhang et al. (2018)
Gohir.D07G083800	GhSLR1a	unknow	Elongation	Aleman et al. (2008)
Gohir.D13G220200	GhMYB46_D13	SCW biosynthesis	SCW biosynthesis	Huang et al. (2019)
Gohir.D12G272900	GhHOX3	Initiation and Elongation	Elongation	Shan et al. (2014)
Gohir.D06G019045	GhWRKY16	Initiation and Elongation	Elongation	Wang et al. (2021)
Gohir.A12G037700	Gohir.A12G037700	FS	SCW biosynthesis	Wang et al.(2017)
Gohir.D09G245700	GhJMJ12	Elongation (5, 10, 15, 20 and 30 dpa)	Elongation and SCW biosynthesis	Liu et al.(2020)
Gohir.A05G243200	GhGT2	Elongation and SCW biosynthesis	Elongation and SCW biosynthesis	Zhang et al.(2022)
Gohir.D04G191100	GhMML7(GhMYB25)	Initiation	Elongation	Machado et al. (2009)
Gohir.A12G163900	GhMML4_D12	Initiation	No expression	Wu et al. (2018)
Gohir.D10G140100	GhttG2	Elongation	Elongation	Humphries et al. (2005)
Gohir.D08G201300	GhDEL65	Elongation	Elongation	Shangguan et al. (2016)
Gohir.D09G157300	GhPAS1(bHLH)	Elongation	Elongation	Wu et al. (2021)
Gohir.A11G313800	GhFP1	Elongation	Elongation	Liu et al., (2020)
Gohir.A03G071300	GhMADS11	Elongation	Elongation	Li et al., (2011)
Gohir.A05G251700	GhMADS14	Elongation	Elongation	Zhou et al., (2014)
Gohir.D04G000300	GhttG3	Elongation	Elongation	John et al. 2005
Gohir.A05G132500	GaHOX1	Initiation and Elongation	Elongation	Wang et al. 2004
Gohir.A06G146300	GhHD1	Initiation and Elongation	Elongation	Walford et al. (2012)
Gohir.D11G022100	GhDEL61	Initiation and Elongation	Elongation	Shangguan et al. (2016)
Gohir.D12G166750	GhMML3 (GhMYB25-like)	Initiation and Elongation	Elongation	Walford et al. (2011), Wan et al. (2016), and Zhu et al. (2018)
Gohir.A05G359100	GhMYB109	Initiation and Elongation	Elongation	Pu et al. (2008) and Suo et al. (2003)
Gohir.A08G168600	GaMYB2	Initiation and Elongation	Elongation	Wang et al. (2004)
Gohir.D04G043900	GhbHLH18	Initiation and Elongation (3-9dpa)	Elongation	Gao et al. (2018)
Gohir.D11G320300	GhMYB212	Elongation (3, 6, 9 and 12 dpa)	Elongation and SCW biosynthesis	Sun et al . (2018)
Gohir.A12G113400	GhMYB5_A12	Elongation (0, 1, 5 and 10 dpa)	Elongation and SCW biosynthesis	Wang et al. (2021)
Gohir.D06G213100	GhCPC	Initiation and Elongation (0, 3, 6 and 9dpa)	Elongation and SCW biosynthesis	Liu et al. (2015)
Gohir.D08G116300	GhTTG1	Elongation and SCW biosynthesis	Elongation and SCW biosynthesis	John et al. 2005
Gohir.D10G251600	GhBLH51	Elongation and SCW biosynthesis	Elongation and SCW biosynthesis	Zhang et al.(2022)
Gohir.D11G113100	GhD27	Elongation and SCW biosynthesis	Elongation and SCW biosynthesis	Zhang et al.(2022)
Gohir.A10G058100	GhMYB7	Elongation and SCW biosynthesis	Elongation and SCW biosynthesis	Huang et al 2016
Gohir.A03G020800	GhMYBL1	Elongation and SCW biosynthesis	Elongation and SCW biosynthesis	Sun et al 2015
Gohir.D01G053400	GhWD40	Elongation and SCW biosynthesis	Elongation and SCW biosynthesis	Tian et al. (2020)
Gohir.A03G023100	GbVAL1	Elongation and SCW biosynthesis	Elongation	Fang et al.（2021）
Gohir.A11G097700	GhARF18	Elongation and SCW biosynthesis	Elongation	Zhu et al. (2021), Xiao et al. (2018)
Gohir.D09G137000	GhGRF4	Elongation and SCW biosynthesis	Elongation	Zhang et al.(2022)
Gohir.D02G204600	GhCERP(bHLH)	Elongation and SCW biosynthesis	Elongation and SCW biosynthesis	Zhu et al., (2023)
Gohir.D03G059500	GhERF41	Elongation	SCW biosynthesis	Gao et al.,2023
Gohir.D08G195900	GhKNL1	SCW biosynthesis	SCW biosynthesis	Gong et al. (2014)
Gohir.A13G120500	GhMYB1	SCW biosynthesis	Elongation and SCW biosynthesis	Yadav et al. (2017)
Gohir.A07G168300	Zinc Finger Gene	unknow	Elongation and SCW biosynthesis	Razzaq et al. (2021)
Gohir.D05G275800	Gohir.D05G275800	FL	Elongation and SCW biosynthesis	Li et al.(2020)
Gohir.A02G066900	GhPIN6	Initiation	Elongation	Zhang et al. (2017b)
Gohir.D01G145100	GhPIN3a	Initiation	Elongation	Zeng et al. (2019)
Gohir.D02G173400	GhSWEET12	Initiation (only detected 3 dpa)	SCW biosynthesis	Sun et al . (2018)
Gohir.A04G140000	GhLTPG1	Elongation	Elongation	Deng et al.(2016)
Gohir.D10G189500	GbAnx6	Elongation	Elongation	Huang et al. (2013c)
Gohir.D11G322100	GhPIN1c	Elongation	Elongation	Zhang et al. (2016)
Gohir.A12G037300	GhRac1	Elongation	Elongation	Kim and Triplett (2004)
Gohir.A12G245900	GhPER8	Elongation	Elongation	Gao et al. (2018)
Gohir.A04G088000	GhDET2	Elongation	Elongation	Luo et al.(2007)
Gohir.A05G174400	GhPIP2	Elongation	Elongation	Li et al, (2013)
Gohir.D10G203700	GhCPK1	Elongation	Elongation	Huang et al. (2008)
Gohir.D03G102800	GhPEL	Elongation	Elongation	Wang et al. (2010a)
Gohir.D11G148900	GhFIM2	Elongation	Elongation	Zhang et al. (2017a)
Gohir.A10G148000	GbEXPATR	Elongation	Elongation	Li et al. (2016)
Gohir.A07G194000	Gh_A07G1758	Elongation	Elongation	Sun et al.(2017)
Gohir.A05G164700	GhCFE1A	Elongation	Elongation	Lv et al. (2015)
Gohir.A05G100600	GhAPX1	Elongation	Elongation	Li et al. (2007a)
Gohir.A03G146400	GhKCS13/CER6	Elongation	Elongation	Qin et al. (2007)
Gohir.D02G119900	GhWBC1	Elongation	Elongation	Zhu et al. (2003)
Gohir.D05G050700	GhRDL1	Elongation	Elongation	Xu et al. (2013a)
Gohir.D06G016900	GhSCP2D	Elongation	Elongation	Zhang et al. (2017d)
Gohir.A05G227300	GhAnn3	Elongation	Elongation	Li et al. (2013a)
Gohir.A02G125200	GhPOX1	Elongation	Elongation	Mei et al. (2009)
Gohir.A12G199100	GhVIN1	Elongation	Elongation	Wang et al. (2010c, 2014)
Gohir.D11G058500	GhACT1	Elongation	Elongation	Li et al. (2005)
Gohir.A13G194500	GhTZF2	Elongation	Elongation	Li et al., 2023
Gohir.D05G098700	KCS10	Elongation	Elongation	Yang et al.,2023
Gohir.D09G009600	GhMAP20L5	Elongation	Elongation	Song et al., (2023)
Gohir.A05G364500	GhPRE1	Elongation	Elongation	Zhao et al., 2018
Gohir.A02G102101	GhTBL7	Elongation	Elongation	Kabir et al., (2023)
Gohir.D03G082100	GhTBL58	Elongation	Elongation	Kabir et al., (2023)
Gohir.A05G403600	GhEXPA3-1	Elongation	Elongation	Zhu et al., (2023)
Gohir.A05G367000	GbAAR3	Elongation	Elongation	Liu et al.,(2023)
Gohir.A05G208400	GbTWS1	Elongation	Elongation	Liu et al.,(2023)
Gohir.D04G090100	Gohir.D04G090100	Elongation	Elongation	Naoumkina et al., 2022
Gohir.D11G055700	GhAnn2	Elongation	Elongation	Tang et al. (2014a)
Gohir.D02G203800	GhXLIM6	Elongation	Elongation	Li et al. (2018)
Gohir.A05G076200	GhCaM7	Elongation	Elongation	Tang et al. (2014b)
Gohir.D05G035100	GbGLP2	Elongation	Elongation	Sun et al. (2020)
Gohir.D04G090100	GhACT_LI1	Elongation	Elongation	Thyssen et al. (2017)
Gohir.A04G114300	GhEXO7_At	Elongation	Elongation	Li et al. (2021)
Gohir.D04G037100	GbPDF1	Initiation and Elongation	Elongation	Deng et al. (2012)
Gohir.A11G054700	GhACTIN1	Elongation(8 and 14 dpa)	Elongation	Li et al. (2005)
Gohir.A12G059400	GhF3H	Elongation	Elongation	Tan et al. (2013)
Gohir.A05G247720	GhLac1	Elongation	Elongation	Hu et al. (2020)
Gohir.D02G160500	GH_D02G1759	Initiation	Elongation	Li et al.,2023
Gohir.D01G012900	GhHMG1	unknow	Elongation	Liu et al ., (2022)
Gohir.D08G060200	GhACO3	Elongation (5, 10, 15 and 20 dpa)	Elongation and SCW biosynthesis	Shi et al. (2006)
Gohir.A05G264050	Gh14-3-3l	Elongation	SCW biosynthesis	Zhou et al.(2014)
Gohir.D09G174550	GhGA20ox1	Elongation (5, 10 and 15 dpa)	SCW biosynthesis	Xiao et al. (2010)
Gohir.A04G117900	GhTUA9	Elongation (5 and 10 dpa)	Elongation and SCW biosynthesis	Li et al. (2007b)
Gohir.D11G052800	GhXTH1	Elongation (15, 20, 25 and 30 dpa)	Elongation and SCW biosynthesis	Lee et al. (2010)
Gohir.D13G240100	GhUGT87A1-D1a	Elongation	Elongation and SCW biosynthesis	Patel et al. (2020)
Gohir.D05G176900	GhACO1	Elongation (0, 1, 5, 10 and 15 dpa)	Elongation and SCW biosynthesis	Wei et al. (2022)
Gohir.D11G227800	GhMAH1	Elongation (5, 10 and 15 dpa)	Elongation and SCW biosynthesis	Ma et al. (2022)
Gohir.A06G152100	GhACO2	Elongation and SCW biosynthesis	Elongation and SCW biosynthesis	Shi et al. (2006)
Gohir.A04G039195	GhATP1	Elongation and SCW biosynthesis	Elongation and SCW biosynthesis	He et al. (2018)
Gohir.D02G174300	GRAM31	Elongation and SCW biosynthesis	Elongation and SCW biosynthesis	Ye et al. (2021)
Gohir.A08G118000	GhSusA1	Elongation and SCW biosynthesis	Elongation and SCW biosynthesis	Jiang et al. (2012)
Gohir.A08G182500	Gh-BtubL	Elongation and SCW biosynthesis	Elongation and SCW biosynthesis	Ji et al. (2002)
Gohir.D01G189900	FE2	Elongation and SCW biosynthesis	Elongation and SCW biosynthesis	He et al.(2021)
Gohir.A07G194800	FS	Elongation and SCW biosynthesis	Elongation and SCW biosynthesis	Ma et al.(2018)
Gohir.A05G232100	GhMAPKK	Elongation and SCW biosynthesis	Elongation and SCW biosynthesis	Fang et al.,(2021)
Gohir.A12G229700	GhATP1	Elongation and SCW biosynthesis	Elongation and SCW biosynthesis	He et al. (2018)
Gohir.A03G023800	GbCIPK	Elongation and SCW biosynthesis	Elongation and SCW biosynthesis	Fang et al.,(2021)
Gohir.D03G086400	GhUBX	Elongation and SCW biosynthesis	Elongation and SCW biosynthesis	Zang et al. (2021)
Gohir.D11G197900	GhKRP6	Elongation and SCW biosynthesis	Elongation and SCW biosynthesis	Sun et al.(2017)
Gohir.A13G019900	GhADF1	Elongation and SCW biosynthesis	Elongation and SCW biosynthesis	Wang et al. (2009)
Gohir.A08G079500	GhHUB2	Elongation and SCW biosynthesis	Elongation and SCW biosynthesis	Feng et al.(2018)
Gohir.D07G185200	GbGAUT1	Elongation and SCW biosynthesis	Elongation and SCW biosynthesis	Sun et al.(2017)
Gohir.A04G041100	GhGalT1	Elongation and SCW biosynthesis	Elongation and SCW biosynthesis	Qin et al.(2016)
Gohir.A03G069900	GhHDA5	Elongation and SCW biosynthesis	Elongation and SCW biosynthesis	Kumar et al. (2018)
Gohir.A05G364000	GhPIN8_At	Elongation and SCW biosynthesis	Elongation and SCW biosynthesis	Zhang et al. (2017b)
Gohir.D10G047501	GhRHD3	Elongation and SCW biosynthesis	Elongation and SCW biosynthesis	Si et al., 2022
Gohir.D10G029600	GhRAC13	Elongation and SCW biosynthesis	Elongation and SCW biosynthesis	Zhang et al. (2020)
Gohir.D01G159750	GhPIS	Elongation and SCW biosynthesis	Elongation and SCW biosynthesis	Long et al. (2018)
Gohir.D08G264500	GhPFN2	Elongation and SCW biosynthesis	Elongation and SCW biosynthesis	Wang et al. (2010b)
Gohir.A13G161400	nkyrin repeat family protein	Elongation and SCW biosynthesis	Elongation	Sun et al.(2017)
Gohir.D02G167200	GhGATL15	Elongation and SCW biosynthesis (5, 10,20 and 25 dpa)	Elongation	Zheng et al. (2019)
Gohir.D06G021500	GhWLIMa	Elongation and SCW biosynthesis	Elongation	Han et al. (2013)
Gohir.D12G233800	GhACO1	Elongation and SCW biosynthesis (5, 10, 15 and 20 dpa)	Elongation	Shi et al. (2006)
Gohir.A09G124400	GhAlaRP	Elongation and SCW biosynthesis	SCW biosynthesis	Zhu et al.(2021)
Gohir.D09G103500	GhFLA1	Elongation and SCW biosynthesis	SCW biosynthesis	Huang et al. (2013a)
Gohir.D06G077500	GhJAZ2	Initiation and SCW biosynthesis	SCW biosynthesis	Hu et al. (2016)
Gohir.A08G145900	GhRabA4c	Elongation	Elongation and SCW biosynthesis	Shang et al.,(2022)
Gohir.D03G105200	GhOR1	unknow	Elongation and SCW biosynthesis	Zeng et al., 2023
Gohir.D05G136400	GhCYP84A1	unknow	Elongation and SCW biosynthesis	Liu et al ., (2022)
Gohir.D01G045000	GhIQD10	Elongation	SCW biosynthesis	Xu et al., 2023
Gohir.A07G117300	GhAGP4	SCW biosynthesis	SCW biosynthesis	Li et al. (2010b)
Gohir.A12G139600	GhFLA9	SCW biosynthesis	SCW biosynthesis	Song et al.（2021）
Gohir.A10G035300	GhcelA1	SCW biosynthesis	SCW biosynthesis	Pear et al. (1996)
Gohir.D10G036000	GhcelA1	SCW biosynthesis	SCW biosynthesis	Pear et al. (1996)
Gohir.D08G056300	GhcelA2	SCW biosynthesis	SCW biosynthesis	Pear et al. (1996)
Gohir.A08G045800	GhcelA2	SCW biosynthesis	SCW biosynthesis	Pear et al. (1996)
Gohir.D10G066000	GhGDSL	SCW biosynthesis	Elongation	Yadav et al. (2017)
Gohir.D06G184000	GhCYS6	SCW biosynthesis (5, 10, 15, 20 and 30 dpa)	Elongation and SCW biosynthesis	Liu et al.(2020)
Gohir.D07G208500	GhCLASP2	SCW biosynthesis	Elongation and SCW biosynthesis	Zhu et al. (2018)
Gohir.D05G257100	GhSMT2–1	unknow	Elongation	Niu et al. (2019)
Gohir.D12G269750	GhPIN1a_Dt	low expression in all stages	Elongation and SCW biosynthesis	Zhang et al.,(2017b)
Gohir.A05G036000	GhSUS1	unknow	Elongation	Ruan et al.(2003)
Gohir.D09G044700	α-EXPA1	unknow	Elongation	Yaqood et al. (2020)
Gohir.A11G119000	GhGID1b	unknow	SCW biosynthesis	Aleman et al. (2008)
Gohir.A12G007600	GhGID1a	unknow	SCW biosynthesis	Aleman et al. (2008)
Gohir.D13G240000	GhUGT87A2	Elongation	low	Patel et al. (2020)
Gohir.A08G006901	GaFZ	Initiation and Elongation	low	Wang et al. (2021)
Gohir.D12G145300	Gohir.D12G145300	FU	Elongation and SCW biosynthesis	Li et al.(2020)
Gohir.A13G046100	Gohir.A13G046100	FE	Elongation and SCW biosynthesis	Li et al.(2020)
Gohir.A06G145300	Gohir.A06G145300	FL	Elongation and SCW biosynthesis	Wang et al.(2017)
Gohir.A07G168800	Gohir.A07G168800	Fiber Elongation rate	Elongation and SCW biosynthesis	Wang et al.(2017)
Gohir.D08G095800	Gohir.D08G095800	Short fiber rate	Elongation and SCW biosynthesis	Wang et al.(2017)
Gohir.D09G029900	Gohir.D09G029900	FU	Elongation	Wang et al.(2017)
Gohir.A12G038000	Gohir.A12G038000	FS	Elongation	Wang et al.(2017)
Gohir.D10G128800	Gohir.D10G128800	MV	Elongation	Wang et al.(2017)
Gohir.D03G048300	Gohir.D03G048300	MV	Elongation	Wang et al.(2017)
Gohir.D04G158900	Gohir.D04G158900	FE	Elongation and SCW biosynthesis	Li et al.(2020)
Gohir.A12G028200	Gohir.A12G028200	Short fiber rate	Elongation and SCW biosynthesis	Wang et al.(2017)
Gohir.D04G160800	Gohir.D04G160800	Fiber Elongation rate	Elongation	Wang et al.(2017)
Gohir.A01G071400	Gohir.A01G071400	Short fiber rate	Elongation	Wang et al.(2017)
Gohir.A10G141100	a gyp1p superfamily protein	GhFL1	Elongation and SCW biosynthesis	Ma et al.(2018)
Gohir.D09G030000	Gohir.D09G030000	FU	Elongation	Wang et al.(2017)
Gohir.D01G058300	Gohir.D01G058300	FL	Elongation	Li et al.(2020)
Gohir.A11G186500	Gohir.A11G186500	Short fiber rate	Elongation	Wang et al.(2017)
Gohir.D07G207500	Gohir.D07G207500	FL	Elongation	Wang et al.(2017)
Gohir.D12G147300	Gohir.D12G147300	FU	Elongation	Li et al.(2020)
Gohir.D10G069600	Gohir.D10G069600	MV	Elongation	Wang et al.(2017)
Gohir.D04G150800	Gohir.D04G150800	FE	Elongation and SCW biosynthesis	Li et al.(2020)
Gohir.A06G089300	Gohir.A06G089300	Short fiber rate	SCW biosynthesis	Wang et al.(2017)
Gohir.D05G009400	Gohir.D05G009400	FU	SCW biosynthesis	Li et al.(2020)
Gohir.A05G008700	Gohir.A05G008700	FU	SCW biosynthesis	Li et al.(2020)
Gohir.D04G160000	Gohir.D04G160000	FE	SCW biosynthesis	Wang et al.(2017)
Gohir.A05G107600	Gohir.A05G107600	FE	Elongation and SCW biosynthesis	He et al.(2021)
Gohir.D10G069700	Gohir.D10G069700	MV	Elongation and SCW biosynthesis	Wang et al.(2017)
Gohir.D07G208100	Gohir.D07G208100	FL	Elongation and SCW biosynthesis	Wang et al.(2017)
Gohir.D09G029800	Gohir.D09G029800	FU	Elongation and SCW biosynthesis	Wang et al.(2017)
Gohir.D08G059800	Gohir.D08G059800	Ghir_D08G005610 (GhFLA7)	SCW biosynthesis	Li et al.,(2020)
Gohir.D13G003300	Gohir.D13G003300	Ghir_D13G000310 (GhFLA17)	SCW biosynthesis	Li et al.,(2020)
Gohir.A13G192600	Gohir.A13G192600	GhXIK	Elongation and SCW biosynthesis	Ma et al.(2018)
Gohir.D11G198700	Gohir.D11G198700	fibre length	Elongation and SCW biosynthesis	Li et al.(2020)
Gohir.D11G326500	Gohir.D11G326500	Short fiber rate	Elongation and SCW biosynthesis	Wang et al.(2017)

## Sheet: Supplementary Table 4
Supplementary Table 4. Significantly enriched GO terms of seven largest co-expression modules identified by WGCNA.
GO ID	p.adjust	Term	Count	Ontology	Module
GO:0015934	1.48e-162	large ribosomal subunit	147	CC	black
GO:0022625	1.69e-161	cytosolic large ribosomal subunit	142	CC	black
GO:0042788	2.45e-149	polysomal ribosome	129	CC	black
GO:0005844	5.71e-138	polysome	129	CC	black
GO:0022627	7.41e-105	cytosolic small ribosomal subunit	89	CC	black
GO:0015935	9.47e-102	small ribosomal subunit	94	CC	black
GO:0002181	4.34e-82	cytoplasmic translation	76	BP	black
GO:0042273	2.37e-69	ribosomal large subunit biogenesis	71	BP	black
GO:0006364	2.79e-45	rRNA processing	69	BP	black
GO:0016072	1.25e-43	rRNA metabolic process	69	BP	black
GO:0042255	1.44e-43	ribosome assembly	50	BP	black
GO:0042274	3.58e-41	ribosomal small subunit biogenesis	47	BP	black
GO:0022618	6.1e-33	ribonucleoprotein complex assembly	57	BP	black
GO:0071826	2.12e-32	ribonucleoprotein complex subunit organization	57	BP	black
GO:0000462	2.79e-29	maturation of SSU-rRNA from tricistronic rRNA transcript (SSU-rRNA, 5.8S rRNA, LSU-rRNA)	32	BP	black
GO:0030490	8.95e-28	maturation of SSU-rRNA	32	BP	black
GO:0098798	2.14e-25	mitochondrial protein complex	46	CC	black
GO:0070925	1.09e-22	organelle assembly	50	BP	black
GO:0098800	9.47e-22	inner mitochondrial membrane protein complex	37	CC	black
GO:0070181	3.68e-20	small ribosomal subunit rRNA binding	17	MF	black
GO:0005743	9.05e-20	mitochondrial inner membrane	49	CC	black
GO:0000470	1.58e-19	maturation of LSU-rRNA	22	BP	black
GO:0000027	1.53e-18	ribosomal large subunit assembly	22	BP	black
GO:0000313	4.72e-16	organellar ribosome	20	CC	black
GO:0000028	1.61e-15	ribosomal small subunit assembly	18	BP	black
GO:0005746	8.42e-15	mitochondrial respirasome	25	CC	black
GO:0019843	9.78e-15	rRNA binding	23	MF	black
GO:0070469	1.21e-14	respirasome	25	CC	black
GO:0098803	1.21e-14	respiratory chain complex	25	CC	black
GO:0043253	1.72e-13	chloroplast ribosome	10	CC	black
GO:1990204	1.72e-13	oxidoreductase complex	25	CC	black
GO:0009547	4.34e-13	plastid ribosome	13	CC	black
GO:0000461	1.98e-12	endonucleolytic cleavage to generate mature 3'-end of SSU-rRNA from (SSU-rRNA, 5.8S rRNA, LSU-rRNA)	9	BP	black
GO:0005747	4.35e-12	mitochondrial respiratory chain complex I	20	CC	black
GO:0045271	4.35e-12	respiratory chain complex I	20	CC	black
GO:0030964	5.82e-12	NADH dehydrogenase complex	20	CC	black
GO:0045047	3.82e-11	protein targeting to ER	13	BP	black
GO:0072599	3.82e-11	establishment of protein localization to endoplasmic reticulum	13	BP	black
GO:0090150	3.05e-09	establishment of protein localization to membrane	16	BP	black
GO:0070972	3.84e-09	protein localization to endoplasmic reticulum	13	BP	black
GO:0031125	4.36e-09	rRNA 3'-end processing	10	BP	black
GO:0006616	4.63e-09	SRP-dependent cotranslational protein targeting to membrane, translocation	8	BP	black
GO:0000469	5.88e-09	cleavage involved in rRNA processing	12	BP	black
GO:0000447	7.14e-09	endonucleolytic cleavage in ITS1 to separate SSU-rRNA from 5.8S rRNA and LSU-rRNA from tricistronic rRNA transcript (SSU-rRNA, 5.8S rRNA, LSU-rRNA)	9	BP	black
GO:0030686	7.14e-09	90S preribosome	12	CC	black
GO:0090151	7.87e-09	establishment of protein localization to mitochondrial membrane	8	BP	black
GO:0006614	1.36e-08	SRP-dependent cotranslational protein targeting to membrane	8	BP	black
GO:0072657	1.14e-07	protein localization to membrane	16	BP	black
GO:0030684	1.25e-07	preribosome	16	CC	black
GO:0000479	1.64e-07	endonucleolytic cleavage of tricistronic rRNA transcript (SSU-rRNA, 5.8S rRNA, LSU-rRNA)	9	BP	black
GO:0006613	3.95e-07	cotranslational protein targeting to membrane	8	BP	black
GO:0043628	5.18e-07	ncRNA 3'-end processing	11	BP	black
GO:0000460	5.93e-07	maturation of 5.8S rRNA	11	BP	black
GO:0000478	5.93e-07	endonucleolytic cleavage involved in rRNA processing	9	BP	black
GO:0000463	1.29e-06	maturation of LSU-rRNA from tricistronic rRNA transcript (SSU-rRNA, 5.8S rRNA, LSU-rRNA)	8	BP	black
GO:0031120	1.39e-06	snRNA pseudouridine synthesis	6	BP	black
GO:0034513	1.39e-06	box H/ACA snoRNA binding	6	MF	black
GO:0000466	2.17e-06	maturation of 5.8S rRNA from tricistronic rRNA transcript (SSU-rRNA, 5.8S rRNA, LSU-rRNA)	9	BP	black
GO:0006457	3.38e-06	protein folding	19	BP	black
GO:0048027	3.38e-06	mRNA 5'-UTR binding	8	MF	black
GO:0065002	3.38e-06	intracellular protein transmembrane transport	17	BP	black
GO:0051087	4.5e-06	chaperone binding	9	MF	black
GO:0031429	8.3e-06	box H/ACA snoRNP complex	6	CC	black
GO:0040031	8.3e-06	snRNA modification	6	BP	black
GO:0072588	8.3e-06	box H/ACA RNP complex	6	CC	black
GO:0009853	8.72e-06	photorespiration	11	BP	black
GO:0071806	1.01e-05	protein transmembrane transport	17	BP	black
GO:0005758	1.15e-05	mitochondrial intermembrane space	8	CC	black
GO:0031970	1.15e-05	organelle envelope lumen	8	CC	black
GO:0005753	1.68e-05	mitochondrial proton-transporting ATP synthase complex	8	CC	black
GO:0016272	1.68e-05	prefoldin complex	5	CC	black
GO:0007007	2.18e-05	inner mitochondrial membrane organization	6	BP	black
GO:0030867	2.18e-05	rough endoplasmic reticulum membrane	6	CC	black
GO:0016469	2.46e-05	proton-transporting two-sector ATPase complex	10	CC	black
GO:0045259	2.7e-05	proton-transporting ATP synthase complex	8	CC	black
GO:0019773	2.78e-05	proteasome core complex, alpha-subunit complex	7	CC	black
GO:0007006	3.13e-05	mitochondrial membrane organization	8	BP	black
GO:0032040	4.48e-05	small-subunit processome	9	CC	black
GO:0030515	5.9e-05	snoRNA binding	8	MF	black
GO:0005787	6.1e-05	signal peptidase complex	5	CC	black
GO:0005665	9.05e-05	RNA polymerase II, core complex	8	CC	black
GO:0005791	0.000133	rough endoplasmic reticulum	6	CC	black
GO:0006612	0.000135	protein targeting to membrane	8	BP	black
GO:0031118	0.000163	rRNA pseudouridine synthesis	6	BP	black
GO:0006605	0.000192	protein targeting	22	BP	black
GO:0071011	0.000194	precatalytic spliceosome	8	CC	black
GO:0005732	0.000196	small nucleolar ribonucleoprotein complex	7	CC	black
GO:0006626	0.000228	protein targeting to mitochondrion	9	BP	black
GO:0070585	0.000228	protein localization to mitochondrion	9	BP	black
GO:0072655	0.000228	establishment of protein localization to mitochondrion	9	BP	black
GO:0019209	0.000278	kinase activator activity	6	MF	black
GO:0030295	0.000278	protein kinase activator activity	6	MF	black
GO:0005761	0.000291	mitochondrial ribosome	7	CC	black
GO:0097525	0.000331	spliceosomal snRNP complex	11	CC	black
GO:0005839	0.000406	proteasome core complex	8	CC	black
GO:1905368	0.000488	peptidase complex	13	CC	black
GO:0005786	0.000687	signal recognition particle, endoplasmic reticulum targeting	4	CC	black
GO:0048500	0.000687	signal recognition particle	4	CC	black
GO:0016073	0.000704	snRNA metabolic process	7	BP	black
GO:0006465	0.000718	signal peptide processing	5	BP	black
GO:0000154	0.000883	rRNA modification	8	BP	black
GO:0030532	0.00092	small nuclear ribonucleoprotein complex	11	CC	black
GO:0031204	0.000931	posttranslational protein targeting to membrane, translocation	4	BP	black
GO:0120114	0.001024	Sm-like protein family complex	11	CC	black
GO:0001522	0.001106	pseudouridine synthesis	6	BP	black
GO:1990542	0.001177	mitochondrial transmembrane transport	9	BP	black
GO:0005749	0.001193	mitochondrial respiratory chain complex II, succinate dehydrogenase complex (ubiquinone)	4	CC	black
GO:0030900	0.001193	forebrain development	4	BP	black
GO:0045257	0.001193	succinate dehydrogenase complex (ubiquinone)	4	CC	black
GO:0045281	0.001193	succinate dehydrogenase complex	4	CC	black
GO:0045283	0.001193	fumarate reductase complex	4	CC	black
GO:0097526	0.001398	spliceosomal tri-snRNP complex	7	CC	black
GO:0000315	0.002404	organellar large ribosomal subunit	5	CC	black
GO:0000419	0.002404	RNA polymerase V complex	5	CC	black
GO:0043094	0.002495	cellular metabolic compound salvage	11	BP	black
GO:0006620	0.002578	posttranslational protein targeting to endoplasmic reticulum membrane	4	BP	black
GO:0045273	0.002578	respiratory chain complex II	4	CC	black
GO:0000418	0.002729	RNA polymerase IV complex	5	CC	black
GO:0046540	0.00276	U4/U6 x U5 tri-snRNP complex	6	CC	black
GO:0006413	0.003031	translational Initiation	9	BP	black
GO:0044743	0.003031	protein transmembrane import into intracellular organelle	9	BP	black
GO:0032544	0.003082	plastid translation	5	BP	black
GO:0031123	0.003373	RNA 3'-end processing	11	BP	black
GO:0000314	0.003521	organellar small ribosomal subunit	5	CC	black
GO:0016591	0.005172	RNA polymerase II, holoenzyme	11	CC	black
GO:0005507	0.005466	copper ion binding	16	MF	black
GO:0005736	0.005484	RNA polymerase I complex	6	CC	black
GO:1990351	0.005596	transporter complex	4	CC	black
GO:0045048	0.006638	protein insertion into ER membrane	4	BP	black
GO:0071816	0.006638	tail-anchored membrane protein insertion into ER membrane	4	BP	black
GO:0005759	0.007282	mitochondrial matrix	12	CC	black
GO:0005763	0.009156	mitochondrial small ribosomal subunit	4	CC	black
GO:0051205	0.009156	protein insertion into membrane	4	BP	black
GO:0030687	0.011367	preribosome, large subunit precursor	5	CC	black
GO:0000702	0.011936	oxidized base lesion DNA N-glycosylase activity	3	MF	black
GO:1904872	0.011936	regulation of telomerase RNA localization to Cajal body	3	BP	black
GO:0000741	0.014436	karyogamy	6	BP	black
GO:0010197	0.014436	polar nucleus fusion	6	BP	black
GO:0045116	0.014979	protein neddylation	3	BP	black
GO:0019887	0.016321	protein kinase regulator activity	7	MF	black
GO:0090502	0.016996	RNA phosphodiester bond hydrolysis, endonucleolytic	9	BP	black
GO:0019207	0.018159	kinase regulator activity	7	MF	black
GO:0031177	0.018159	phosphopantetheine binding	3	MF	black
GO:0071005	0.018159	U2-type precatalytic spliceosome	3	CC	black
GO:0009559	0.018546	embryo sac central cell differentiation	6	BP	black
GO:0005666	0.019787	RNA polymerase III complex	6	CC	black
GO:0000275	0.021648	mitochondrial proton-transporting ATP synthase complex, catalytic sector F(1)	3	CC	black
GO:0045261	0.021648	proton-transporting ATP synthase complex, catalytic core F(1)	3	CC	black
GO:0009245	0.025601	lipid A biosynthetic process	3	BP	black
GO:0046493	0.025601	lipid A metabolic process	3	BP	black
GO:1901269	0.025601	lipooligosaccharide metabolic process	3	BP	black
GO:1901271	0.025601	lipooligosaccharide biosynthetic process	3	BP	black
GO:0015030	0.026588	Cajal body	4	CC	black
GO:0051085	0.026588	chaperone cofactor-dependent protein refolding	4	BP	black
GO:0090501	0.029287	RNA phosphodiester bond hydrolysis	13	BP	black
GO:0051082	0.033887	unfolded protein binding	7	MF	black
GO:0042327	0.035301	positive regulation of phosphorylation	11	BP	black
GO:0010562	0.037124	positive regulation of phosphorus metabolic process	11	BP	black
GO:0045937	0.037124	positive regulation of phosphate metabolic process	11	BP	black
GO:0061695	0.037124	transferase complex, transferring phosphorus-containing groups	15	CC	black
GO:0000082	0.038066	G1/S transition of mitotic cell cycle	5	BP	black
GO:0006986	0.038066	response to unfolded protein	5	BP	black
GO:0007420	0.038066	brain development	4	BP	black
GO:0060322	0.038066	head development	4	BP	black
GO:0005697	0.03899	telomerase holoenzyme complex	3	CC	black
GO:0043495	0.03899	protein-membrane adaptor activity	3	MF	black
GO:0015985	0.040478	energy coupled proton transport, down electrochemical gradient	4	BP	black
GO:0015986	0.040478	ATP synthesis coupled proton transport	4	BP	black
GO:0016859	0.040478	cis-trans isomerase activity	7	MF	black
GO:0030137	0.040478	COPI-coated vesicle	4	CC	black
GO:0005681	0.042997	spliceosomal complex	11	CC	black
GO:0005762	0.043448	mitochondrial large ribosomal subunit	3	CC	black
GO:0016444	0.043448	somatic cell DNA recombination	3	BP	black
GO:0051084	0.04345	de novo' posttranslational protein folding	4	BP	black
GO:0044843	0.04691	cell cycle G1/S phase transition	5	BP	black
GO:0051131	0.049162	chaperone-mediated protein complex assembly	3	BP	black
GO:0044183	0.049571	protein folding chaperone	5	MF	black
GO:0006665	0.003572	sphingolipid metabolic process	24	BP	yellow
GO:0042761	0.003587	very long-chain fatty acid biosynthetic process	13	BP	yellow
GO:0000038	0.006919	very long-chain fatty acid metabolic process	16	BP	yellow
GO:0046658	0.006919	anchored component of plasma membrane	44	CC	yellow
GO:0099513	0.006919	polymeric cytoskeletal fiber	47	CC	yellow
GO:0030148	0.007034	sphingolipid biosynthetic process	19	BP	yellow
GO:0000922	0.007943	spindle pole	11	CC	yellow
GO:0005874	0.010202	microtubule	42	CC	yellow
GO:0009073	0.010726	aromatic amino acid family biosynthetic process	17	BP	yellow
GO:0009932	0.010726	cell tip growth	40	BP	yellow
GO:0016126	0.010726	sterol biosynthetic process	17	BP	yellow
GO:0031225	0.010726	anchored component of membrane	49	CC	yellow
GO:0045489	0.010726	pectin biosynthetic process	18	BP	yellow
GO:0005788	0.011817	endoplasmic reticulum lumen	20	CC	yellow
GO:0016860	0.012158	intramolecular oxidoreductase activity	24	MF	yellow
GO:0030981	0.012158	cortical microtubule cytoskeleton	18	CC	yellow
GO:0099081	0.012158	supramolecular polymer	47	CC	yellow
GO:0099512	0.012158	supramolecular fiber	47	CC	yellow
GO:0055028	0.012247	cortical microtubule	17	CC	yellow
GO:0006694	0.01228	steroid biosynthetic process	22	BP	yellow
GO:0005509	0.012385	calcium ion binding	34	MF	yellow
GO:0048588	0.012385	developmental cell growth	45	BP	yellow
GO:0099080	0.012385	supramolecular complex	48	CC	yellow
GO:0000254	0.013496	C-4 methylsterol oxidase activity	6	MF	yellow
GO:0009664	0.013496	plant-type cell wall organization	38	BP	yellow
GO:0002790	0.028657	peptide secretion	9	BP	yellow
GO:0009306	0.028657	protein secretion	9	BP	yellow
GO:0015116	0.028657	sulfate transmembrane transporter activity	9	MF	yellow
GO:1902358	0.028657	sulfate transmembrane transport	9	BP	yellow
GO:0009860	0.032558	pollen tube growth	28	BP	yellow
GO:0004312	0.035094	fatty acid synthase activity	14	MF	yellow
GO:0006633	0.037546	fatty acid biosynthetic process	30	BP	yellow
GO:0005881	0.03887	cytoplasmic microtubule	18	CC	yellow
GO:0045488	0.03887	pectin metabolic process	20	BP	yellow
GO:1900457	0.03887	regulation of brassinosteroid mediated signaling pathway	13	BP	yellow
GO:0006221	0.038914	pyrimidine nucleotide biosynthetic process	15	BP	yellow
GO:0008757	0.038978	S-adenosylmethionine-dependent methyltransferase activity	45	MF	yellow
GO:0006576	0.039081	cellular biogenic amine metabolic process	18	BP	yellow
GO:0016741	0.039081	transferase activity, transferring one-carbon groups	54	MF	yellow
GO:0044106	0.039081	cellular amine metabolic process	18	BP	yellow
GO:0008168	0.039334	methyltransferase activity	52	MF	yellow
GO:0006643	0.043427	membrane lipid metabolic process	30	BP	yellow
GO:0008236	0.046283	serine-type peptidase activity	21	MF	yellow
GO:0017171	0.046283	serine hydrolase activity	21	MF	yellow
GO:1901605	0.046283	alpha-amino acid metabolic process	48	BP	yellow
GO:0004634	0.046888	phosphopyruvate hydratase activity	5	MF	yellow
GO:0009072	0.046888	aromatic amino acid family metabolic process	19	BP	yellow
GO:0016233	0.046888	telomere capping	5	BP	yellow
GO:0042451	0.046888	purine nucleoside biosynthetic process	7	BP	yellow
GO:0046129	0.046888	purine ribonucleoside biosynthetic process	7	BP	yellow
GO:0070008	0.046888	serine-type exopeptidase activity	11	MF	yellow
GO:0006591	0.049845	ornithine metabolic process	6	BP	yellow
GO:0017048	0.049845	Rho GTPase binding	13	MF	yellow
GO:0045962	0.049845	positive regulation of development, heterochronic	6	BP	yellow
GO:0000502	1.47e-15	proteasome complex	53	CC	blue
GO:1905369	1.47e-15	endopeptidase complex	53	CC	blue
GO:0005839	1.65e-15	proteasome core complex	34	CC	blue
GO:1905368	3.46e-15	peptidase complex	58	CC	blue
GO:0005747	3.17e-14	mitochondrial respiratory chain complex I	45	CC	blue
GO:0045271	3.17e-14	respiratory chain complex I	45	CC	blue
GO:0030964	5.6e-14	NADH dehydrogenase complex	45	CC	blue
GO:0019774	1.57e-13	proteasome core complex, beta-subunit complex	22	CC	blue
GO:0098800	7.64e-13	inner mitochondrial membrane protein complex	63	CC	blue
GO:0005746	5.77e-12	mitochondrial respirasome	48	CC	blue
GO:0070469	1.1e-11	respirasome	48	CC	blue
GO:0098803	1.1e-11	respiratory chain complex	48	CC	blue
GO:0005743	1.62e-11	mitochondrial inner membrane	99	CC	blue
GO:0098798	2.73e-11	mitochondrial protein complex	73	CC	blue
GO:1990204	9.14e-10	oxidoreductase complex	48	CC	blue
GO:0031201	7.38e-08	SNARE complex	36	CC	blue
GO:0009853	1.47e-05	photorespiration	25	BP	blue
GO:0043094	2.31e-05	cellular metabolic compound salvage	37	BP	blue
GO:0016655	3.5e-05	oxidoreductase activity, acting on NAD(P)H, quinone or similar compound as acceptor	20	MF	blue
GO:0000149	4.51e-05	SNARE binding	33	MF	blue
GO:0061025	5.35e-05	membrane fusion	37	BP	blue
GO:0006605	6.17e-05	protein targeting	70	BP	blue
GO:0016050	6.27e-05	vesicle organization	45	BP	blue
GO:0006906	7.16e-05	vesicle fusion	30	BP	blue
GO:0000338	7.9e-05	protein deneddylation	15	BP	blue
GO:0004632	9.46e-05	phosphopantothenate--cysteine ligase activity	8	MF	blue
GO:0090174	9.46e-05	organelle membrane fusion	30	BP	blue
GO:0005484	0.000199	SNAP receptor activity	23	MF	blue
GO:0009394	0.000232	2'-deoxyribonucleotide metabolic process	10	BP	blue
GO:0019692	0.000232	deoxyribose phosphate metabolic process	10	BP	blue
GO:0006471	0.000546	protein ADP-ribosylation	8	BP	blue
GO:0061024	0.000567	membrane organization	70	BP	blue
GO:0006626	0.000624	protein targeting to mitochondrion	21	BP	blue
GO:0070585	0.000624	protein localization to mitochondrion	21	BP	blue
GO:0072655	0.000624	establishment of protein localization to mitochondrion	21	BP	blue
GO:0070646	0.000718	protein modification by small protein removal	29	BP	blue
GO:0034599	0.000774	cellular response to oxidative stress	42	BP	blue
GO:0030162	0.001093	regulation of proteolysis	47	BP	blue
GO:0005483	0.00126	soluble NSF attachment protein activity	7	MF	blue
GO:0005688	0.00126	U6 snRNP	7	CC	blue
GO:0019773	0.00126	proteasome core complex, alpha-subunit complex	12	CC	blue
GO:0061136	0.00126	regulation of proteasomal protein catabolic process	28	BP	blue
GO:1903050	0.00126	regulation of proteolysis involved in cellular protein catabolic process	28	BP	blue
GO:1903362	0.00126	regulation of cellular protein catabolic process	28	BP	blue
GO:0009262	0.001351	deoxyribonucleotide metabolic process	10	BP	blue
GO:0043281	0.001351	regulation of cysteine-type endopeptidase activity involved in apoptotic process	10	BP	blue
GO:0004866	0.001613	endopeptidase inhibitor activity	12	MF	blue
GO:0030414	0.001613	peptidase inhibitor activity	12	MF	blue
GO:0030150	0.001863	protein import into mitochondrial matrix	14	BP	blue
GO:0000815	0.002179	ESCRT III complex	11	CC	blue
GO:0052548	0.002179	regulation of endopeptidase activity	17	BP	blue
GO:0044743	0.002219	protein transmembrane import into intracellular organelle	25	BP	blue
GO:0048767	0.002828	root hair Elongation	29	BP	blue
GO:0005507	0.002993	copper ion binding	53	MF	blue
GO:0052547	0.003167	regulation of peptidase activity	17	BP	blue
GO:0034404	0.003635	nucleobase-containing small molecule biosynthetic process	31	BP	blue
GO:0042176	0.004252	regulation of protein catabolic process	30	BP	blue
GO:0036452	0.004604	ESCRT complex	17	CC	blue
GO:0048284	0.004763	organelle fusion	35	BP	blue
GO:0061135	0.004802	endopeptidase regulator activity	12	MF	blue
GO:0051224	0.006238	negative regulation of protein transport	12	BP	blue
GO:1904950	0.006238	negative regulation of establishment of protein localization	12	BP	blue
GO:0048280	0.006896	vesicle fusion with Golgi apparatus	7	BP	blue
GO:0012507	0.0072	ER to Golgi transport vesicle membrane	9	CC	blue
GO:0016651	0.007355	oxidoreductase activity, acting on NAD(P)H	35	MF	blue
GO:0061134	0.007778	peptidase regulator activity	12	MF	blue
GO:0010469	0.008895	regulation of signaling receptor activity	11	BP	blue
GO:0010876	0.009546	lipid localization	35	BP	blue
GO:2000116	0.010253	regulation of cysteine-type endopeptidase activity	14	BP	blue
GO:0009219	0.010995	pyrimidine deoxyribonucleotide metabolic process	6	BP	blue
GO:0045861	0.010995	negative regulation of proteolysis	16	BP	blue
GO:0006888	0.011194	endoplasmic reticulum to Golgi vesicle-mediated transport	26	BP	blue
GO:1990542	0.011242	mitochondrial transmembrane transport	21	BP	blue
GO:0097237	0.013028	cellular response to toxic substance	36	BP	blue
GO:0006839	0.015201	mitochondrial transport	38	BP	blue
GO:1990748	0.015201	cellular detoxification	33	BP	blue
GO:0010008	0.015585	endosome membrane	44	CC	blue
GO:0010387	0.015824	COP9 signalosome assembly	7	BP	blue
GO:0016667	0.016569	oxidoreductase activity, acting on a sulfur group of donors	26	MF	blue
GO:0042287	0.017809	MHC protein binding	6	MF	blue
GO:0005744	0.020439	TIM23 mitochondrial import inner membrane translocase complex	10	CC	blue
GO:0098869	0.020715	cellular oxidant detoxification	32	BP	blue
GO:0044766	0.02262	multi-organism transport	9	BP	blue
GO:1902579	0.02262	multi-organism localization	9	BP	blue
GO:0000036	0.023432	acyl carrier activity	8	MF	blue
GO:0044620	0.023432	ACP phosphopantetheine attachment site binding	8	MF	blue
GO:0051192	0.023432	prosthetic group binding	8	MF	blue
GO:0007267	0.024401	cell-cell signaling	21	BP	blue
GO:0016881	0.024401	acid-amino acid ligase activity	10	MF	blue
GO:0033293	0.024401	monocarboxylic acid binding	15	MF	blue
GO:0010466	0.024679	negative regulation of peptidase activity	12	BP	blue
GO:0010951	0.024679	negative regulation of endopeptidase activity	12	BP	blue
GO:0044769	0.024679	ATPase activity, coupled to transmembrane movement of ions, rotational mechanism	11	MF	blue
GO:0005179	0.026879	hormone activity	9	MF	blue
GO:0030545	0.026879	receptor regulator activity	9	MF	blue
GO:0048018	0.026879	receptor ligand activity	9	MF	blue
GO:0005844	0.02723	polysome	47	CC	blue
GO:0017038	0.027683	protein import	48	BP	blue
GO:0015936	0.028517	coenzyme A metabolic process	10	BP	blue
GO:0015937	0.028517	coenzyme A biosynthetic process	10	BP	blue
GO:0009200	0.028985	deoxyribonucleoside triphosphate metabolic process	7	BP	blue
GO:0004869	0.033135	cysteine-type endopeptidase inhibitor activity	9	MF	blue
GO:0030134	0.033135	COPII-coated ER to Golgi transport vesicle	9	CC	blue
GO:0034614	0.033135	cellular response to reactive oxygen species	20	BP	blue
GO:0097526	0.033364	spliceosomal tri-snRNP complex	14	CC	blue
GO:0006869	0.03371	lipid transport	28	BP	blue
GO:0016459	0.03371	myosin complex	10	CC	blue
GO:0033108	0.03371	mitochondrial respiratory chain complex assembly	10	BP	blue
GO:0042788	0.03371	polysomal ribosome	41	CC	blue
GO:0002188	0.035071	translation reInitiation	6	BP	blue
GO:0016572	0.035071	histone phosphorylation	6	BP	blue
GO:0031177	0.035071	phosphopantetheine binding	6	MF	blue
GO:0000054	0.036988	ribosomal subunit export from nucleus	10	BP	blue
GO:0009133	0.036988	nucleoside diphosphate biosynthetic process	5	BP	blue
GO:0009186	0.036988	deoxyribonucleoside diphosphate metabolic process	5	BP	blue
GO:0009189	0.036988	deoxyribonucleoside diphosphate biosynthetic process	5	BP	blue
GO:0010171	0.036988	body morphogenesis	5	BP	blue
GO:0010172	0.036988	embryonic body morphogenesis	5	BP	blue
GO:0031305	0.036988	integral component of mitochondrial inner membrane	9	CC	blue
GO:0033750	0.036988	ribosome localization	10	BP	blue
GO:0040002	0.036988	collagen and cuticulin-based cuticle development	5	BP	blue
GO:0040018	0.036988	positive regulation of multicellular organism growth	5	BP	blue
GO:0042338	0.036988	cuticle development involved in collagen and cuticulin-based cuticle molting cycle	5	BP	blue
GO:0043154	0.036988	negative regulation of cysteine-type endopeptidase activity involved in apoptotic process	5	BP	blue
GO:0044772	0.036988	mitotic cell cycle phase transition	17	BP	blue
GO:0045739	0.036988	positive regulation of DNA repair	5	BP	blue
GO:1901681	0.036988	sulfur compound binding	12	MF	blue
GO:1901292	0.037367	nucleoside phosphate catabolic process	18	BP	blue
GO:0002495	0.039164	antigen processing and presentation of peptide antigen via MHC class II	12	BP	blue
GO:0002504	0.039164	antigen processing and presentation of peptide or polysaccharide antigen via MHC class II	12	BP	blue
GO:0019882	0.039164	antigen processing and presentation	12	BP	blue
GO:0048002	0.039164	antigen processing and presentation of peptide antigen	12	BP	blue
GO:0007031	0.039263	peroxisome organization	21	BP	blue
GO:0002183	0.040084	cytoplasmic translational Initiation	8	BP	blue
GO:0080147	0.042716	root hair cell development	29	BP	blue
GO:0019852	0.042819	L-ascorbic acid metabolic process	10	BP	blue
GO:0046961	0.042819	proton-transporting ATPase activity, rotational mechanism	9	MF	blue
GO:0016853	0.047693	isomerase activity	56	MF	blue
GO:0009834	1.1e-30	plant-type secondary cell wall biogenesis	63	BP	green
GO:0009832	1.11e-21	plant-type cell wall biogenesis	89	BP	green
GO:0042546	1.91e-17	cell wall biogenesis	93	BP	green
GO:0045491	9.04e-14	xylan metabolic process	39	BP	green
GO:0034637	2.88e-12	cellular carbohydrate biosynthetic process	78	BP	green
GO:0033692	4.34e-12	cellular polysaccharide biosynthetic process	69	BP	green
GO:0000271	1.74e-11	polysaccharide biosynthetic process	74	BP	green
GO:0010383	2.38e-11	cell wall polysaccharide metabolic process	51	BP	green
GO:0010410	6.42e-11	hemicellulose metabolic process	40	BP	green
GO:0044036	6.74e-11	cell wall macromolecule metabolic process	57	BP	green
GO:0070592	6.74e-11	cell wall polysaccharide biosynthetic process	40	BP	green
GO:0044038	1.51e-10	cell wall macromolecule biosynthetic process	40	BP	green
GO:0070589	1.51e-10	cellular component macromolecule biosynthetic process	40	BP	green
GO:0045492	1.82e-10	xylan biosynthetic process	30	BP	green
GO:1990937	2.69e-09	xylan acetylation	12	BP	green
GO:0002009	3.26e-07	morphogenesis of an epithelium	23	BP	green
GO:0010413	3.26e-07	glucuronoxylan metabolic process	19	BP	green
GO:0010417	3.26e-07	glucuronoxylan biosynthetic process	19	BP	green
GO:0048729	3.26e-07	tissue morphogenesis	23	BP	green
GO:0035239	1.62e-06	tube morphogenesis	22	BP	green
GO:0006897	1.88e-06	endocytosis	42	BP	green
GO:0098657	2.74e-06	import into cell	46	BP	green
GO:0009250	3.04e-06	glucan biosynthetic process	40	BP	green
GO:0030243	3.17e-06	cellulose metabolic process	27	BP	green
GO:0044264	3.19e-06	cellular polysaccharide metabolic process	73	BP	green
GO:0030244	3.51e-06	cellulose biosynthetic process	26	BP	green
GO:0004888	3.84e-06	transmembrane signaling receptor activity	68	MF	green
GO:0015020	5.55e-06	glucuronosyltransferase activity	17	MF	green
GO:0051274	7.3e-06	beta-glucan biosynthetic process	26	BP	green
GO:0035295	7.69e-06	tube development	23	BP	green
GO:0080116	7.75e-06	glucuronoxylan glucuronosyltransferase activity	10	MF	green
GO:0031016	1.1e-05	pancreas development	9	BP	green
GO:0035469	1.1e-05	determination of pancreatic left/right asymmetry	9	BP	green
GO:0071907	1.1e-05	determination of digestive tract left/right asymmetry	9	BP	green
GO:0071910	1.1e-05	determination of liver left/right asymmetry	9	BP	green
GO:0009887	1.23e-05	animal organ morphogenesis	18	BP	green
GO:0060562	1.43e-05	epithelial tube morphogenesis	16	BP	green
GO:0051960	1.62e-05	regulation of nervous system development	21	BP	green
GO:0048565	2.17e-05	digestive tract development	11	BP	green
GO:0055123	2.17e-05	digestive system development	11	BP	green
GO:0060429	2.95e-05	epithelium development	28	BP	green
GO:0051273	3.14e-05	beta-glucan metabolic process	27	BP	green
GO:0008194	3.96e-05	UDP-glycosyltransferase activity	57	MF	green
GO:0003341	4.37e-05	cilium movement	9	BP	green
GO:0030276	5.52e-05	clathrin binding	17	MF	green
GO:0007167	7.31e-05	enzyme linked receptor protein signaling pathway	57	BP	green
GO:0000139	8.28e-05	Golgi membrane	53	CC	green
GO:0004675	8.97e-05	transmembrane receptor protein serine/threonine kinase activity	55	MF	green
GO:0005795	0.000102	Golgi stack	23	CC	green
GO:0007178	0.000102	transmembrane receptor protein serine/threonine kinase signaling pathway	55	BP	green
GO:2000027	0.000103	regulation of animal organ morphogenesis	13	BP	green
GO:0030323	0.000131	respiratory tube development	9	BP	green
GO:0030324	0.000131	lung development	9	BP	green
GO:0060026	0.000131	convergent extension	8	BP	green
GO:0060027	0.000131	convergent extension involved in gastrulation	8	BP	green
GO:0060541	0.000131	respiratory system development	9	BP	green
GO:2000010	0.00022	positive regulation of protein localization to cell surface	7	BP	green
GO:0019199	0.000237	transmembrane receptor protein kinase activity	56	MF	green
GO:0045596	0.000314	negative regulation of cell differentiation	18	BP	green
GO:0001895	0.000381	retina homeostasis	7	BP	green
GO:0003205	0.000381	cardiac chamber development	8	BP	green
GO:0003230	0.000381	cardiac atrium development	8	BP	green
GO:0003279	0.000381	cardiac septum development	8	BP	green
GO:0003283	0.000381	atrial septum development	8	BP	green
GO:0005769	0.000381	early endosome	32	CC	green
GO:0045494	0.000381	photoreceptor cell maintenance	7	BP	green
GO:0048496	0.000381	maintenance of animal organ identity	7	BP	green
GO:0060993	0.000381	kidney morphogenesis	7	BP	green
GO:0071908	0.000381	determination of intestine left/right asymmetry	7	BP	green
GO:0071909	0.000381	determination of stomach left/right asymmetry	7	BP	green
GO:0072189	0.000381	ureter development	7	BP	green
GO:0090178	0.000381	regulation of establishment of planar polarity involved in neural tube closure	7	BP	green
GO:1905276	0.000381	regulation of epithelial tube formation	7	BP	green
GO:2000167	0.000381	regulation of planar cell polarity pathway involved in neural tube closure	7	BP	green
GO:0007166	0.000401	cell surface receptor signaling pathway	61	BP	green
GO:0031985	0.000435	Golgi cisterna	16	CC	green
GO:0001889	0.00045	liver development	9	BP	green
GO:0061008	0.00045	hepaticobiliary system development	9	BP	green
GO:0042285	0.00045	xylosyltransferase activity	13	MF	green
GO:0006898	0.000527	receptor-mediated endocytosis	22	BP	green
GO:0004197	0.000585	cysteine-type endopeptidase activity	19	MF	green
GO:0070861	0.000585	regulation of protein exit from endoplasmic reticulum	8	BP	green
GO:0070863	0.000585	positive regulation of protein exit from endoplasmic reticulum	8	BP	green
GO:0008466	0.000622	glycogenin glucosyltransferase activity	10	MF	green
GO:0097435	0.000695	supramolecular fiber organization	49	BP	green
GO:0005978	0.00072	glycogen biosynthetic process	11	BP	green
GO:0001947	0.000925	heart looping	9	BP	green
GO:0003007	0.000925	heart morphogenesis	9	BP	green
GO:0003143	0.000925	embryonic heart tube morphogenesis	9	BP	green
GO:0035050	0.000925	embryonic heart tube development	9	BP	green
GO:0061371	0.000925	determination of heart left/right asymmetry	9	BP	green
GO:2000095	0.000925	regulation of Wnt signaling pathway, planar cell polarity pathway	8	BP	green
GO:0001894	0.001115	tissue homeostasis	7	BP	green
GO:0003351	0.001115	epithelial cilium movement involved in extracellular fluid movement	7	BP	green
GO:0030136	0.001115	clathrin-coated vesicle	18	CC	green
GO:0060287	0.001115	epithelial cilium movement involved in determination of left/right asymmetry	7	BP	green
GO:0006493	0.001167	protein O-linked glycosylation	12	BP	green
GO:0051050	0.001167	positive regulation of transport	24	BP	green
GO:1901981	0.001247	phosphatidylinositol phosphate binding	18	MF	green
GO:0032050	0.001272	clathrin heavy chain binding	9	MF	green
GO:0035967	0.001448	cellular response to topologically incorrect protein	18	BP	green
GO:0048562	0.001532	embryonic organ morphogenesis	11	BP	green
GO:2000008	0.001823	regulation of protein localization to cell surface	7	BP	green
GO:0034757	0.002114	negative regulation of iron ion transport	6	BP	green
GO:0080117	0.002114	secondary growth	6	BP	green
GO:0080190	0.002114	lateral growth	6	BP	green
GO:0046527	0.002423	glucosyltransferase activity	43	MF	green
GO:0090693	0.002786	plant organ senescence	43	BP	green
GO:0022603	0.003057	regulation of anatomical structure morphogenesis	54	BP	green
GO:0048732	0.003382	gland development	9	BP	green
GO:0002683	0.003443	negative regulation of immune system process	19	BP	green
GO:0002165	0.004005	instar larval or pupal development	8	BP	green
GO:0009886	0.004005	post-embryonic animal morphogenesis	8	BP	green
GO:0048568	0.004005	embryonic organ development	11	BP	green
GO:0000323	0.005202	lytic vacuole	30	CC	green
GO:0001822	0.005812	kidney development	7	BP	green
GO:0007472	0.005812	wing disc morphogenesis	7	BP	green
GO:0007476	0.005812	imaginal disc-derived wing morphogenesis	7	BP	green
GO:0007552	0.005812	metamorphosis	7	BP	green
GO:0007560	0.005812	imaginal disc morphogenesis	7	BP	green
GO:0010150	0.005812	leaf senescence	41	BP	green
GO:0030178	0.005812	negative regulation of Wnt signaling pathway	11	BP	green
GO:0035114	0.005812	imaginal disc-derived appendage morphogenesis	7	BP	green
GO:0035120	0.005812	post-embryonic appendage morphogenesis	7	BP	green
GO:0035220	0.005812	wing disc development	7	BP	green
GO:0048563	0.005812	post-embryonic animal organ morphogenesis	7	BP	green
GO:0048707	0.005812	instar larval or pupal morphogenesis	7	BP	green
GO:0048737	0.005812	imaginal disc-derived appendage development	7	BP	green
GO:0072583	0.005812	clathrin-dependent endocytosis	15	BP	green
GO:0090090	0.005812	negative regulation of canonical Wnt signaling pathway	11	BP	green
GO:2001009	0.005812	regulation of plant-type cell wall cellulose biosynthetic process	6	BP	green
GO:0005615	0.006329	extracellular space	23	CC	green
GO:0060284	0.006427	regulation of cell development	25	BP	green
GO:0051222	0.006632	positive regulation of protein transport	15	BP	green
GO:0090316	0.006635	positive regulation of intracellular protein transport	13	BP	green
GO:0007444	0.006754	imaginal disc development	8	BP	green
GO:0015144	0.006857	carbohydrate transmembrane transporter activity	25	MF	green
GO:0034219	0.006857	carbohydrate transmembrane transport	25	BP	green
GO:0006073	0.006885	cellular glucan metabolic process	46	BP	green
GO:0031225	0.007466	anchored component of membrane	44	CC	green
GO:0035251	0.007849	UDP-glucosyltransferase activity	32	MF	green
GO:0006515	0.008007	protein quality control for misfolded or incompletely synthesized proteins	12	BP	green
GO:0007568	0.008198	aging	45	BP	green
GO:0002221	0.00951	pattern recognition receptor signaling pathway	10	BP	green
GO:0002758	0.00951	innate immune response-activating signal transduction	10	BP	green
GO:0071218	0.009726	cellular response to misfolded protein	11	BP	green
GO:0009101	0.009742	glycoprotein biosynthetic process	30	BP	green
GO:0009856	0.009862	pollination	51	BP	green
GO:0044706	0.009862	multi-multicellular organism process	51	BP	green
GO:0009514	0.01058	glyoxysome	9	CC	green
GO:0005464	0.010803	UDP-xylose transmembrane transporter activity	5	MF	green
GO:0015790	0.010803	UDP-xylose transmembrane transport	5	BP	green
GO:0080054	0.010803	low-affinity nitrate transmembrane transporter activity	5	MF	green
GO:0090175	0.010803	regulation of establishment of planar polarity	8	BP	green
GO:1904951	0.010803	positive regulation of establishment of protein localization	15	BP	green
GO:1905330	0.010803	regulation of morphogenesis of an epithelium	8	BP	green
GO:1990538	0.010803	xylan O-acetyltransferase activity	8	MF	green
GO:2000050	0.010803	regulation of non-canonical Wnt signaling pathway	8	BP	green
GO:0030111	0.01089	regulation of Wnt signaling pathway	11	BP	green
GO:0060828	0.01089	regulation of canonical Wnt signaling pathway	11	BP	green
GO:0044042	0.010955	glucan metabolic process	46	BP	green
GO:0000138	0.011487	Golgi trans cisterna	6	CC	green
GO:0035091	0.011757	phosphatidylinositol binding	23	MF	green
GO:0000226	0.012896	microtubule cytoskeleton organization	45	BP	green
GO:0045664	0.012896	regulation of neuron differentiation	13	BP	green
GO:0050767	0.012896	regulation of neurogenesis	13	BP	green
GO:0010037	0.013191	response to carbon dioxide	8	BP	green
GO:0020037	0.013191	heme binding	8	MF	green
GO:0042995	0.013191	cell projection	39	CC	green
GO:0072347	0.013191	response to anesthetic	8	BP	green
GO:0120025	0.013191	plasma membrane bounded cell projection	39	CC	green
GO:0035966	0.013244	response to topologically incorrect protein	19	BP	green
GO:0007398	0.014495	ectoderm development	5	BP	green
GO:0007498	0.014495	mesoderm development	5	BP	green
GO:0007616	0.014495	long-term memory	5	BP	green
GO:0008052	0.014495	sensory organ boundary specification	5	BP	green
GO:0010160	0.014495	formation of animal organ boundary	5	BP	green
GO:0016360	0.014495	sensory organ precursor cell fate determination	5	BP	green
GO:0019898	0.014495	extrinsic component of membrane	22	CC	green
GO:0031146	0.014495	SCF-dependent proteasomal ubiquitin-dependent protein catabolic process	12	BP	green
GO:0034756	0.014495	regulation of iron ion transport	6	BP	green
GO:0035203	0.014495	regulation of lamellocyte differentiation	5	BP	green
GO:0035204	0.014495	negative regulation of lamellocyte differentiation	5	BP	green
GO:0036513	0.014495	Derlin-1 retrotranslocation complex	9	CC	green
GO:0042478	0.014495	regulation of eye photoreceptor cell development	5	BP	green
GO:0045314	0.014495	regulation of compound eye photoreceptor development	5	BP	green
GO:0045610	0.014495	regulation of hemocyte differentiation	5	BP	green
GO:0045611	0.014495	negative regulation of hemocyte differentiation	5	BP	green
GO:0045613	0.014495	regulation of plasmatocyte differentiation	5	BP	green
GO:0045614	0.014495	negative regulation of plasmatocyte differentiation	5	BP	green
GO:0045747	0.014495	positive regulation of Notch signaling pathway	5	BP	green
GO:0046532	0.014495	regulation of photoreceptor cell differentiation	5	BP	green
GO:0048645	0.014495	animal organ formation	5	BP	green
GO:0060582	0.014495	cell fate determination involved in pattern specification	5	BP	green
GO:0090481	0.014495	pyrimidine nucleotide-sugar transmembrane transport	9	BP	green
GO:1903338	0.014495	regulation of cell wall organization or biogenesis	15	BP	green
GO:1903707	0.014495	negative regulation of hemopoiesis	5	BP	green
GO:0030135	0.014527	coated vesicle	22	CC	green
GO:0008643	0.014675	carbohydrate transport	25	BP	green
GO:0007369	0.014783	gastrulation	8	BP	green
GO:0072359	0.015336	circulatory system development	11	BP	green
GO:0007423	0.015368	sensory organ development	7	BP	green
GO:0048569	0.015368	post-embryonic animal organ development	7	BP	green
GO:0004673	0.015716	protein histidine kinase activity	9	MF	green
GO:0007507	0.015716	heart development	10	BP	green
GO:0016775	0.015716	phosphotransferase activity, nitrogenous group as acceptor	9	MF	green
GO:0018106	0.015716	peptidyl-histidine phosphorylation	9	BP	green
GO:0051119	0.017069	sugar transmembrane transporter activity	19	MF	green
GO:0005543	0.017672	phospholipid binding	31	MF	green
GO:0032266	0.018194	phosphatidylinositol-3-phosphate binding	8	MF	green
GO:0009833	0.018586	plant-type primary cell wall biogenesis	12	BP	green
GO:0010623	0.019015	programmed cell death involved in cell development	6	BP	green
GO:0010981	0.019015	regulation of cell wall macromolecule metabolic process	6	BP	green
GO:0005764	0.019104	lysosome	23	CC	green
GO:0032580	0.019448	Golgi cisterna membrane	7	CC	green
GO:0072001	0.019448	renal system development	7	BP	green
GO:0005938	0.019906	cell cortex	38	CC	green
GO:0010721	0.019906	negative regulation of cell development	5	BP	green
GO:0010977	0.019906	negative regulation of neuron projection development	5	BP	green
GO:0031345	0.019906	negative regulation of cell projection organization	5	BP	green
GO:0032388	0.019906	positive regulation of intracellular transport	13	BP	green
GO:0045665	0.019906	negative regulation of neuron differentiation	5	BP	green
GO:0046556	0.019906	alpha-L-arabinofuranosidase activity	5	MF	green
GO:0048679	0.019906	regulation of axon regeneration	5	BP	green
GO:0048681	0.019906	negative regulation of axon regeneration	5	BP	green
GO:0050768	0.019906	negative regulation of neurogenesis	5	BP	green
GO:0050777	0.019906	negative regulation of immune response	14	BP	green
GO:0051788	0.019906	response to misfolded protein	12	BP	green
GO:0070570	0.019906	regulation of neuron projection regeneration	5	BP	green
GO:0070571	0.019906	negative regulation of neuron projection regeneration	5	BP	green
GO:1903035	0.019906	negative regulation of response to wounding	5	BP	green
GO:1903829	0.019906	positive regulation of cellular protein localization	13	BP	green
GO:0045488	0.020805	pectin metabolic process	18	BP	green
GO:0007368	0.021384	determination of left/right symmetry	9	BP	green
GO:0009100	0.022309	glycoprotein metabolic process	32	BP	green
GO:0008234	0.022484	cysteine-type peptidase activity	20	MF	green
GO:0016620	0.022484	oxidoreductase activity, acting on the aldehyde or oxo group of donors, NAD or NADP as acceptor	13	MF	green
GO:0004707	0.022544	MAP kinase activity	12	MF	green
GO:0005797	0.023846	Golgi medial cisterna	6	CC	green
GO:0005996	0.02499	monosaccharide metabolic process	28	BP	green
GO:0002757	0.028063	immune response-activating signal transduction	10	BP	green
GO:0045595	0.028063	regulation of cell differentiation	40	BP	green
GO:0051017	0.028063	actin filament bundle assembly	10	BP	green
GO:0061572	0.028063	actin filament bundle organization	10	BP	green
GO:0004175	0.028256	endopeptidase activity	41	MF	green
GO:0007422	0.028256	peripheral nervous system development	5	BP	green
GO:0030718	0.028256	germ-line stem cell population maintenance	5	BP	green
GO:0097501	0.028256	stress response to metal ion	5	BP	green
GO:0000322	0.028258	storage vacuole	15	CC	green
GO:0016759	0.028583	cellulose synthase activity	11	MF	green
GO:0030139	0.028583	endocytic vesicle	11	CC	green
GO:0019321	0.029466	pentose metabolic process	9	BP	green
GO:0031122	0.031396	cytoplasmic microtubule organization	19	BP	green
GO:0002764	0.031765	immune response-regulating signaling pathway	10	BP	green
GO:0009063	0.031765	cellular amino acid catabolic process	16	BP	green
GO:0016763	0.031765	transferase activity, transferring pentosyl groups	16	MF	green
GO:0034330	0.035783	cell junction organization	7	BP	green
GO:0045216	0.035783	cell-cell junction organization	7	BP	green
GO:0048441	0.036339	petal development	8	BP	green
GO:0048465	0.036339	corolla development	8	BP	green
GO:0008289	0.037877	lipid binding	40	MF	green
GO:0008417	0.037877	fucosyltransferase activity	5	MF	green
GO:0008593	0.037877	regulation of Notch signaling pathway	5	BP	green
GO:0030029	0.037877	actin filament-based process	35	BP	green
GO:0036065	0.037877	fucosylation	5	BP	green
GO:0042732	0.037877	D-xylose metabolic process	5	BP	green
GO:0048749	0.037877	compound eye development	5	BP	green
GO:0052541	0.037877	plant-type cell wall cellulose metabolic process	5	BP	green
GO:0060581	0.037877	cell fate commitment involved in pattern specification	5	BP	green
GO:0070405	0.037877	ammonium ion binding	5	MF	green
GO:0000062	0.037937	fatty-acyl-CoA binding	6	MF	green
GO:0008810	0.037937	cellulase activity	6	MF	green
GO:0009884	0.037937	cytokinin receptor activity	6	MF	green
GO:0034051	0.037937	negative regulation of plant-type hypersensitive response	6	BP	green
GO:1901567	0.037937	fatty acid derivative binding	6	MF	green
GO:0010200	0.03814	response to chitin	44	BP	green
GO:0099568	0.03814	cytoplasmic region	40	CC	green
GO:0010017	0.038935	red or far-red light signaling pathway	18	BP	green
GO:0007015	0.040728	actin filament organization	25	BP	green
GO:0001655	0.041575	urogenital system development	7	BP	green
GO:0048871	0.041575	multicellular organismal homeostasis	7	BP	green
GO:0071482	0.042514	cellular response to light stimulus	32	BP	green
GO:0034059	0.045037	response to anoxia	9	BP	green
GO:0043269	0.045037	regulation of ion transport	22	BP	green
GO:0006911	0.047257	phagocytosis, engulfment	6	BP	green
GO:0010271	0.047257	regulation of chlorophyll catabolic process	6	BP	green
GO:0032411	0.047257	positive regulation of transporter activity	6	BP	green
GO:0032414	0.047257	positive regulation of ion transmembrane transporter activity	6	BP	green
GO:1901404	0.047257	regulation of tetrapyrrole catabolic process	6	BP	green
GO:2001006	0.047257	regulation of cellulose biosynthetic process	6	BP	green
GO:0016157	0.048881	sucrose synthase activity	5	MF	green
GO:0070403	0.048881	NAD+ binding	5	MF	green
GO:0098609	0.048881	cell-cell adhesion	5	BP	green
GO:0035107	0.04899	appendage morphogenesis	7	BP	green
GO:0048736	0.04899	appendage development	7	BP	green
GO:0070413	0.04899	trehalose metabolism in response to stress	7	BP	green
GO:0043622	0.049363	cortical microtubule organization	17	BP	green
GO:0031344	0.049366	regulation of cell projection organization	13	BP	green
GO:0044782	0.049366	cilium organization	13	BP	green
GO:0120035	0.049366	regulation of plasma membrane bounded cell projection organization	13	BP	green
GO:0040029	9.8e-16	regulation of gene expression, epigenetic	70	BP	red
GO:0000932	2.08e-15	P-body	40	CC	red
GO:0006913	3.66e-15	nucleocytoplasmic transport	58	BP	red
GO:0016570	3.66e-15	histone modification	73	BP	red
GO:0051169	3.66e-15	nuclear transport	58	BP	red
GO:0016569	6.28e-15	covalent chromatin modification	73	BP	red
GO:0006401	2.77e-14	RNA catabolic process	48	BP	red
GO:0034655	2.88e-14	nucleobase-containing compound catabolic process	60	BP	red
GO:0035770	4.02e-13	ribonucleoprotein granule	46	CC	red
GO:0034237	3.57e-12	protein kinase A regulatory subunit binding	15	MF	red
GO:0036464	5.4e-12	cytoplasmic ribonucleoprotein granule	44	CC	red
GO:1902531	5.67e-12	regulation of intracellular signal transduction	53	BP	red
GO:0007033	5.82e-12	vacuole organization	43	BP	red
GO:0000122	6.4e-12	negative regulation of transcription by RNA polymerase II	29	BP	red
GO:0000785	6.4e-12	chromatin	63	CC	red
GO:0006402	6.4e-12	mRNA catabolic process	39	BP	red
GO:0051493	6.67e-12	regulation of cytoskeleton organization	42	BP	red
GO:0044270	1.02e-11	cellular nitrogen compound catabolic process	61	BP	red
GO:0032535	1.1e-11	regulation of cellular component size	44	BP	red
GO:0046700	1.1e-11	heterocycle catabolic process	61	BP	red
GO:0051018	1.1e-11	protein kinase A binding	15	MF	red
GO:0000956	1.78e-11	nuclear-transcribed mRNA catabolic process	35	BP	red
GO:0010090	3.24e-11	trichome morphogenesis	41	BP	red
GO:0034399	3.27e-11	nuclear periphery	29	CC	red
GO:0090066	4.61e-11	regulation of anatomical structure size	44	BP	red
GO:0005086	4.67e-11	ARF guanyl-nucleotide exchange factor activity	19	MF	red
GO:0009894	4.67e-11	regulation of catabolic process	58	BP	red
GO:0048193	4.93e-11	Golgi vesicle transport	52	BP	red
GO:0019439	8.97e-11	aromatic compound catabolic process	61	BP	red
GO:0051168	1.05e-10	nuclear export	36	BP	red
GO:0051568	2.33e-10	histone H3-K4 methylation	19	BP	red
GO:0008064	1.12e-09	regulation of actin polymerization or depolymerization	30	BP	red
GO:0030832	1.12e-09	regulation of actin filament length	30	BP	red
GO:1901361	1.12e-09	organic cyclic compound catabolic process	61	BP	red
GO:0110053	1.32e-09	regulation of actin filament organization	30	BP	red
GO:1902903	1.88e-09	regulation of supramolecular fiber organization	32	BP	red
GO:0005085	2.23e-09	guanyl-nucleotide exchange factor activity	26	MF	red
GO:0005635	2.23e-09	nuclear envelope	46	CC	red
GO:0070603	2.44e-09	SWI/SNF superfamily-type complex	23	CC	red
GO:0032956	3.15e-09	regulation of actin cytoskeleton organization	33	BP	red
GO:0030126	3.71e-09	COPI vesicle coat	14	CC	red
GO:0030663	3.71e-09	COPI-coated vesicle membrane	14	CC	red
GO:0006606	3.77e-09	protein import into nucleus	31	BP	red
GO:0046488	3.77e-09	phosphatidylinositol metabolic process	31	BP	red
GO:0018205	4.51e-09	peptidyl-lysine modification	48	BP	red
GO:0032970	5.19e-09	regulation of actin filament-based process	33	BP	red
GO:0051020	5.53e-09	GTPase binding	43	MF	red
GO:0030117	5.79e-09	membrane coat	20	CC	red
GO:0048475	5.79e-09	coated membrane	20	CC	red
GO:0008139	6.11e-09	nuclear localization sequence binding	22	MF	red
GO:1903798	6.11e-09	regulation of production of miRNAs involved in gene silencing by miRNA	10	BP	red
GO:0051170	6.29e-09	import into nucleus	31	BP	red
GO:0018024	7.11e-09	histone-lysine N-methyltransferase activity	15	MF	red
GO:0016482	7.88e-09	cytosolic transport	23	BP	red
GO:0034968	1.12e-08	histone lysine methylation	25	BP	red
GO:0006611	1.13e-08	protein export from nucleus	30	BP	red
GO:0010104	1.13e-08	regulation of ethylene-activated signaling pathway	26	BP	red
GO:0034504	1.13e-08	protein localization to nucleus	32	BP	red
GO:0070297	1.13e-08	regulation of phosphorelay signal transduction system	26	BP	red
GO:1902532	1.13e-08	negative regulation of intracellular signal transduction	30	BP	red
GO:0099023	1.24e-08	vesicle tethering complex	25	CC	red
GO:0031503	1.47e-08	protein-containing complex localization	32	BP	red
GO:0007283	1.47e-08	spermatogenesis	16	BP	red
GO:0090626	1.79e-08	plant epidermis morphogenesis	41	BP	red
GO:0060147	2.53e-08	regulation of posttranscriptional gene silencing	17	BP	red
GO:0005049	3.4e-08	nuclear export signal receptor activity	10	MF	red
GO:0016571	3.77e-08	histone methylation	33	BP	red
GO:1904949	3.77e-08	ATPase complex	23	CC	red
GO:0010648	7.69e-08	negative regulation of cell communication	56	BP	red
GO:0023057	7.69e-08	negative regulation of signaling	56	BP	red
GO:0030662	7.69e-08	coated vesicle membrane	21	CC	red
GO:0030659	8.57e-08	cytoplasmic vesicle membrane	26	CC	red
GO:2000114	9.12e-08	regulation of establishment of cell polarity	15	BP	red
GO:0030137	9.67e-08	COPI-coated vesicle	14	CC	red
GO:0010026	9.72e-08	trichome differentiation	41	BP	red
GO:0032271	9.72e-08	regulation of protein polymerization	26	BP	red
GO:0016458	9.88e-08	gene silencing	48	BP	red
GO:0006405	1.02e-07	RNA export from nucleus	30	BP	red
GO:0010091	1.1e-07	trichome branching	23	BP	red
GO:0016197	1.2e-07	endosomal transport	27	BP	red
GO:0140142	1.38e-07	nucleocytoplasmic carrier activity	10	MF	red
GO:0010256	1.41e-07	endomembrane system organization	34	BP	red
GO:0070920	1.6e-07	regulation of production of small RNA involved in gene silencing by RNA	12	BP	red
GO:0018022	1.8e-07	peptidyl-lysine methylation	25	BP	red
GO:0012506	1.97e-07	vesicle membrane	26	CC	red
GO:0030833	2.08e-07	regulation of actin filament polymerization	25	BP	red
GO:0050657	2.08e-07	nucleic acid transport	30	BP	red
GO:0050658	2.08e-07	RNA transport	30	BP	red
GO:0051236	2.08e-07	establishment of RNA localization	30	BP	red
GO:0006479	2.11e-07	protein methylation	35	BP	red
GO:0008213	2.11e-07	protein alkylation	35	BP	red
GO:0042147	2.31e-07	retrograde transport, endosome to Golgi	18	BP	red
GO:0010638	2.32e-07	positive regulation of organelle organization	35	BP	red
GO:0061041	2.36e-07	regulation of wound healing	10	BP	red
GO:0090303	2.36e-07	positive regulation of wound healing	10	BP	red
GO:1903036	2.36e-07	positive regulation of response to wounding	10	BP	red
GO:0033962	2.48e-07	P-body assembly	13	BP	red
GO:0042826	2.48e-07	histone deacetylase binding	13	MF	red
GO:0009968	2.99e-07	negative regulation of signal transduction	53	BP	red
GO:0031329	3.41e-07	regulation of cellular catabolic process	46	BP	red
GO:0030120	3.45e-07	vesicle coat	16	CC	red
GO:0046854	3.45e-07	phosphatidylinositol phosphorylation	16	BP	red
GO:0030660	3.52e-07	Golgi-associated vesicle membrane	21	CC	red
GO:0099513	3.84e-07	polymeric cytoskeletal fiber	41	CC	red
GO:0051130	3.94e-07	positive regulation of cellular component organization	44	BP	red
GO:0099081	4.62e-07	supramolecular polymer	43	CC	red
GO:0099512	4.62e-07	supramolecular fiber	43	CC	red
GO:0043254	5.46e-07	regulation of protein-containing complex assembly	33	BP	red
GO:0030029	5.58e-07	actin filament-based process	39	BP	red
GO:0071417	6.09e-07	cellular response to organonitrogen compound	19	BP	red
GO:0016234	6.38e-07	inclusion body	11	CC	red
GO:0034260	6.84e-07	negative regulation of GTPase activity	13	BP	red
GO:0005815	7.31e-07	microtubule organizing center	24	CC	red
GO:0060968	7.64e-07	regulation of gene silencing	25	BP	red
GO:0090068	8.11e-07	positive regulation of cell cycle process	22	BP	red
GO:0006650	8.6e-07	glycerophospholipid metabolic process	35	BP	red
GO:0016575	8.94e-07	histone deacetylation	16	BP	red
GO:0006891	9.29e-07	intra-Golgi vesicle-mediated transport	18	BP	red
GO:0010199	1.04e-06	organ boundary specification between lateral organs and the meristem	9	BP	red
GO:0000045	1.11e-06	autophagosome assembly	16	BP	red
GO:0000285	1.11e-06	1-phosphatidylinositol-3-phosphate 5-kinase activity	10	MF	red
GO:0030135	1.11e-06	coated vesicle	25	CC	red
GO:0071166	1.11e-06	ribonucleoprotein complex localization	26	BP	red
GO:0071426	1.11e-06	ribonucleoprotein complex export from nucleus	26	BP	red
GO:1905037	1.13e-06	autophagosome organization	17	BP	red
GO:0005048	1.14e-06	signal sequence binding	23	MF	red
GO:0000919	1.17e-06	cell plate assembly	13	BP	red
GO:0005814	1.17e-06	centriole	8	CC	red
GO:0016278	1.17e-06	lysine N-methyltransferase activity	15	MF	red
GO:0016279	1.17e-06	protein-lysine N-methyltransferase activity	15	MF	red
GO:0099080	1.17e-06	supramolecular complex	43	CC	red
GO:2000011	1.17e-06	regulation of adaxial/abaxial pattern formation	8	BP	red
GO:0031401	1.17e-06	positive regulation of protein modification process	42	BP	red
GO:0006403	1.21e-06	RNA localization	31	BP	red
GO:0005874	1.22e-06	microtubule	37	CC	red
GO:0006476	1.26e-06	protein deacetylation	16	BP	red
GO:0032878	1.26e-06	regulation of establishment or maintenance of cell polarity	16	BP	red
GO:0006893	1.29e-06	Golgi to plasma membrane transport	12	BP	red
GO:0072331	1.29e-06	signal transduction by p53 class mediator	11	BP	red
GO:0060149	1.69e-06	negative regulation of posttranscriptional gene silencing	9	BP	red
GO:0060969	2.11e-06	negative regulation of gene silencing	13	BP	red
GO:0004534	2.14e-06	5'-3' exoribonuclease activity	7	MF	red
GO:0009756	2.14e-06	carbohydrate mediated signaling	26	BP	red
GO:0010182	2.14e-06	sugar mediated signaling pathway	26	BP	red
GO:0042054	2.2e-06	histone methyltransferase activity	21	MF	red
GO:0034515	2.3e-06	proteasome storage granule	8	CC	red
GO:0070925	2.52e-06	organelle assembly	50	BP	red
GO:0006610	2.52e-06	ribosomal protein import into nucleus	12	BP	red
GO:0060964	2.53e-06	regulation of gene silencing by miRNA	10	BP	red
GO:0051640	2.61e-06	organelle localization	42	BP	red
GO:0000184	2.7e-06	nuclear-transcribed mRNA catabolic process, nonsense-mediated decay	13	BP	red
GO:0019898	3.21e-06	extrinsic component of membrane	24	CC	red
GO:0046903	3.21e-06	secretion	35	BP	red
GO:0006406	3.33e-06	mRNA export from nucleus	21	BP	red
GO:0051028	3.33e-06	mRNA transport	21	BP	red
GO:0071427	3.33e-06	mRNA-containing ribonucleoprotein complex export from nucleus	21	BP	red
GO:0046834	3.52e-06	lipid phosphorylation	16	BP	red
GO:0000288	4e-06	nuclear-transcribed mRNA catabolic process, deadenylation-dependent decay	17	BP	red
GO:0005942	4.54e-06	phosphatidylinositol 3-kinase complex	9	CC	red
GO:0032940	4.54e-06	secretion by cell	33	BP	red
GO:0035032	4.54e-06	phosphatidylinositol 3-kinase complex, class III	9	CC	red
GO:0060966	4.54e-06	regulation of gene silencing by RNA	13	BP	red
GO:0010959	4.75e-06	regulation of metal ion transport	17	BP	red
GO:0040034	5.09e-06	regulation of development, heterochronic	26	BP	red
GO:0000118	5.18e-06	histone deacetylase complex	14	CC	red
GO:0005930	5.26e-06	axoneme	11	CC	red
GO:0097014	5.26e-06	ciliary plasm	11	CC	red
GO:0043631	5.81e-06	RNA polyadenylation	18	BP	red
GO:0009856	6.17e-06	pollination	47	BP	red
GO:0044706	6.17e-06	multi-multicellular organism process	47	BP	red
GO:0000790	7.17e-06	nuclear chromatin	31	CC	red
GO:0008276	7.45e-06	protein methyltransferase activity	23	MF	red
GO:0090283	7.45e-06	regulation of protein glycosylation in Golgi	8	BP	red
GO:0090284	7.45e-06	positive regulation of protein glycosylation in Golgi	8	BP	red
GO:0048609	8.36e-06	multicellular organismal reproductive process	48	BP	red
GO:0006887	9.34e-06	exocytosis	29	BP	red
GO:0019783	1.01e-05	ubiquitin-like protein-specific protease activity	14	MF	red
GO:0045652	1.03e-05	regulation of megakaryocyte differentiation	7	BP	red
GO:0032506	1.05e-05	cytokinetic process	25	BP	red
GO:0097435	1.07e-05	supramolecular fiber organization	41	BP	red
GO:0017038	1.18e-05	protein import	39	BP	red
GO:0006892	1.31e-05	post-Golgi vesicle-mediated transport	16	BP	red
GO:1901981	1.33e-05	phosphatidylinositol phosphate binding	17	MF	red
GO:0071230	1.34e-05	cellular response to amino acid stimulus	12	BP	red
GO:0004386	1.34e-05	helicase activity	34	MF	red
GO:0000139	1.49e-05	Golgi membrane	41	CC	red
GO:0032588	1.49e-05	trans-Golgi network membrane	18	CC	red
GO:0043414	1.49e-05	macromolecule methylation	45	BP	red
GO:0070988	1.49e-05	demethylation	18	BP	red
GO:0008186	1.51e-05	RNA-dependent ATPase activity	28	MF	red
GO:0009909	1.63e-05	regulation of flower development	46	BP	red
GO:0005881	1.68e-05	cytoplasmic microtubule	18	CC	red
GO:0051495	1.68e-05	positive regulation of cytoskeleton organization	18	BP	red
GO:0032838	1.74e-05	plasma membrane bounded cell projection cytoplasm	11	CC	red
GO:0003724	1.79e-05	RNA helicase activity	28	MF	red
GO:0006338	1.91e-05	chromatin remodeling	25	BP	red
GO:0043001	1.91e-05	Golgi to plasma membrane protein transport	7	BP	red
GO:0061951	1.91e-05	establishment of protein localization to plasma membrane	7	BP	red
GO:0005643	1.92e-05	nuclear pore	18	CC	red
GO:0000281	1.97e-05	mitotic cytokinesis	35	BP	red
GO:0010560	1.97e-05	positive regulation of glycoprotein biosynthetic process	8	BP	red
GO:0060049	1.97e-05	regulation of protein glycosylation	8	BP	red
GO:0060050	1.97e-05	positive regulation of protein glycosylation	8	BP	red
GO:1903020	1.97e-05	positive regulation of glycoprotein metabolic process	8	BP	red
GO:0035091	1.99e-05	phosphatidylinositol binding	23	MF	red
GO:0032270	2e-05	positive regulation of cellular protein metabolic process	51	BP	red
GO:0035601	2e-05	protein deacylation	16	BP	red
GO:0098732	2e-05	macromolecule deacylation	16	BP	red
GO:0045814	2.01e-05	negative regulation of gene expression, epigenetic	24	BP	red
GO:0098794	2.05e-05	postsynapse	10	CC	red
GO:0042641	2.15e-05	actomyosin	13	CC	red
GO:0098876	2.15e-05	vesicle-mediated transport to the plasma membrane	13	BP	red
GO:0031047	2.18e-05	gene silencing by RNA	31	BP	red
GO:2000069	2.26e-05	regulation of post-embryonic root development	17	BP	red
GO:0046486	2.28e-05	glycerolipid metabolic process	39	BP	red
GO:0099568	2.63e-05	cytoplasmic region	39	CC	red
GO:0031965	2.77e-05	nuclear membrane	21	CC	red
GO:1903034	2.79e-05	regulation of response to wounding	10	BP	red
GO:0140030	2.81e-05	modification-dependent protein binding	18	MF	red
GO:0000151	2.88e-05	ubiquitin ligase complex	48	CC	red
GO:0051301	2.98e-05	cell division	50	BP	red
GO:0006977	3.17e-05	DNA damage response, signal transduction by p53 class mediator resulting in cell cycle arrest	7	BP	red
GO:0032872	3.17e-05	regulation of stress-activated MAPK cascade	7	BP	red
GO:0043197	3.17e-05	dendritic spine	7	CC	red
GO:0044309	3.17e-05	neuron spine	7	CC	red
GO:0046328	3.17e-05	regulation of JNK cascade	7	BP	red
GO:0070302	3.17e-05	regulation of stress-activated protein kinase signaling cascade	7	BP	red
GO:0072431	3.17e-05	signal transduction involved in mitotic G1 DNA damage checkpoint	7	BP	red
GO:1902400	3.17e-05	intracellular signal transduction involved in G1 DNA damage checkpoint	7	BP	red
GO:0042981	3.23e-05	regulation of apoptotic process	23	BP	red
GO:0007032	3.97e-05	endosome organization	12	BP	red
GO:0009910	4.15e-05	negative regulation of flower development	19	BP	red
GO:0010105	4.15e-05	negative regulation of ethylene-activated signaling pathway	18	BP	red
GO:0070298	4.15e-05	negative regulation of phosphorelay signal transduction system	18	BP	red
GO:0007141	4.32e-05	male meiosis I	6	BP	red
GO:0006607	4.4e-05	NLS-bearing protein import into nucleus	15	BP	red
GO:0061640	4.4e-05	cytoskeleton-dependent cytokinesis	35	BP	red
GO:0010559	4.42e-05	regulation of glycoprotein biosynthetic process	8	BP	red
GO:0030330	4.42e-05	DNA damage response, signal transduction by p53 class mediator	8	BP	red
GO:1903018	4.42e-05	regulation of glycoprotein metabolic process	8	BP	red
GO:0035195	4.53e-05	gene silencing by miRNA	17	BP	red
GO:0032451	4.67e-05	demethylase activity	13	MF	red
GO:0031593	4.78e-05	polyubiquitin modification-dependent protein binding	10	MF	red
GO:0051225	5.06e-05	spindle assembly	14	BP	red
GO:0009846	5.25e-05	pollen germination	21	BP	red
GO:0007034	5.46e-05	vacuolar transport	27	BP	red
GO:2000035	5.65e-05	regulation of stem cell division	13	BP	red
GO:0000331	5.73e-05	contractile vacuole	11	CC	red
GO:0000911	5.91e-05	cytokinesis by cell plate formation	22	BP	red
GO:1902410	5.91e-05	mitotic cytokinetic process	22	BP	red
GO:0001819	6.26e-05	positive regulation of cytokine production	10	BP	red
GO:0005798	6.46e-05	Golgi-associated vesicle	21	CC	red
GO:0016574	6.46e-05	histone ubiquitination	8	BP	red
GO:0043269	6.46e-05	regulation of ion transport	23	BP	red
GO:0043044	7.29e-05	ATP-dependent chromatin remodeling	12	BP	red
GO:0000910	7.42e-05	cytokinesis	35	BP	red
GO:0006897	7.61e-05	endocytosis	28	BP	red
GO:0140027	8.15e-05	establishment of contractile vacuole localization	10	BP	red
GO:0006890	8.37e-05	retrograde vesicle-mediated transport, Golgi to endoplasmic reticulum	19	BP	red
GO:0031209	8.51e-05	SCAR complex	7	CC	red
GO:0045637	8.51e-05	regulation of myeloid cell differentiation	7	BP	red
GO:0051494	8.8e-05	negative regulation of cytoskeleton organization	17	BP	red
GO:1902904	8.8e-05	negative regulation of supramolecular fiber organization	17	BP	red
GO:0009553	8.9e-05	embryo sac development	37	BP	red
GO:0000145	8.91e-05	exocyst	11	CC	red
GO:0042325	9.16e-05	regulation of phosphorylation	39	BP	red
GO:0016307	0.000104	phosphatidylinositol phosphate kinase activity	10	MF	red
GO:0043543	0.000108	protein acylation	22	BP	red
GO:0030837	0.000114	negative regulation of actin filament polymerization	16	BP	red
GO:0032272	0.000114	negative regulation of protein polymerization	16	BP	red
GO:0048509	0.000114	regulation of meristem development	37	BP	red
GO:0019216	0.000119	regulation of lipid metabolic process	24	BP	red
GO:1902905	0.000126	positive regulation of supramolecular fiber organization	15	BP	red
GO:0009686	0.000129	gibberellin biosynthetic process	17	BP	red
GO:0032504	0.000129	multicellular organism reproduction	48	BP	red
GO:0033263	0.00013	CORVET complex	7	CC	red
GO:0043112	0.00013	receptor metabolic process	8	BP	red
GO:1903169	0.00013	regulation of calcium ion transmembrane transport	7	BP	red
GO:0071322	0.000132	cellular response to carbohydrate stimulus	26	BP	red
GO:0019220	0.000134	regulation of phosphate metabolic process	45	BP	red
GO:0051174	0.000134	regulation of phosphorus metabolic process	45	BP	red
GO:0005929	0.000142	cilium	15	CC	red
GO:0009945	0.000143	radial axis specification	6	BP	red
GO:0010528	0.000143	regulation of transposition	6	BP	red
GO:0010529	0.000143	negative regulation of transposition	6	BP	red
GO:0032006	0.000143	regulation of TOR signaling	6	BP	red
GO:0033522	0.000143	histone H2A ubiquitination	6	BP	red
GO:0043201	0.000143	response to leucine	6	BP	red
GO:0031333	0.000165	negative regulation of protein-containing complex assembly	16	BP	red
GO:0051656	0.000166	establishment of organelle localization	29	BP	red
GO:2000280	0.000166	regulation of root development	25	BP	red
GO:0044087	0.000173	regulation of cellular component biogenesis	40	BP	red
GO:0006342	0.000174	chromatin silencing	20	BP	red
GO:0006353	0.000174	DNA-templated transcription, termination	8	BP	red
GO:0048506	0.000174	regulation of timing of meristematic phase transition	20	BP	red
GO:0048510	0.000174	regulation of timing of transition from vegetative to reproductive phase	20	BP	red
GO:0060321	0.000174	acceptance of pollen	8	BP	red
GO:1901699	0.000174	cellular response to nitrogen compound	32	BP	red
GO:0010506	0.00018	regulation of autophagy	13	BP	red
GO:0030048	0.00018	actin filament-based movement	13	BP	red
GO:0010587	0.000186	miRNA catabolic process	7	BP	red
GO:0044380	0.000186	protein localization to cytoskeleton	7	BP	red
GO:0072698	0.000186	protein localization to microtubule cytoskeleton	7	BP	red
GO:0010008	0.000195	endosome membrane	32	CC	red
GO:0016236	0.000208	macroautophagy	18	BP	red
GO:0009942	0.00023	longitudinal axis specification	9	BP	red
GO:0090691	0.00023	formation of plant organ boundary	9	BP	red
GO:0000146	0.000231	microfilament motor activity	11	MF	red
GO:0000228	0.000231	nuclear chromosome	44	CC	red
GO:0005846	0.000231	nuclear cap binding complex	6	CC	red
GO:0032452	0.000231	histone demethylase activity	11	MF	red
GO:0033275	0.000231	actin-myosin filament sliding	11	BP	red
GO:0071156	0.000231	regulation of cell cycle arrest	8	BP	red
GO:0071158	0.000231	positive regulation of cell cycle arrest	8	BP	red
GO:1904580	0.000231	regulation of intracellular mRNA localization	6	BP	red
GO:1902402	0.000267	signal transduction involved in mitotic DNA damage checkpoint	7	BP	red
GO:1902403	0.000267	signal transduction involved in mitotic DNA integrity checkpoint	7	BP	red
GO:0032273	0.000282	positive regulation of protein polymerization	13	BP	red
GO:0006928	0.000298	movement of cell or subcellular component	40	BP	red
GO:0007030	0.000302	Golgi organization	15	BP	red
GO:0045332	0.000308	phospholipid translocation	8	BP	red
GO:0048544	0.000308	recognition of pollen	8	BP	red
GO:0016363	0.000339	nuclear matrix	11	CC	red
GO:0003774	0.000353	motor activity	27	MF	red
GO:0007155	0.000367	cell adhesion	9	BP	red
GO:0022610	0.000367	biological adhesion	9	BP	red
GO:0031086	0.000367	nuclear-transcribed mRNA catabolic process, deadenylation-independent decay	6	BP	red
GO:0031087	0.000367	deadenylation-independent decapping of nuclear-transcribed mRNA	6	BP	red
GO:0070507	0.000367	regulation of microtubule cytoskeleton organization	9	BP	red
GO:0070772	0.000367	PAS complex	6	CC	red
GO:0000972	0.000371	transcription-dependent tethering of RNA polymerase II gene DNA at nuclear periphery	7	BP	red
GO:0031571	0.000371	mitotic G1 DNA damage checkpoint	7	BP	red
GO:0044783	0.000371	G1 DNA damage checkpoint	7	BP	red
GO:0044819	0.000371	mitotic G1/S transition checkpoint	7	BP	red
GO:1902807	0.000371	negative regulation of cell cycle G1/S phase transition	7	BP	red
GO:2000134	0.000371	negative regulation of G1/S transition of mitotic cell cycle	7	BP	red
GO:0030433	0.000378	ubiquitin-dependent ERAD pathway	15	BP	red
GO:0098657	0.000378	import into cell	29	BP	red
GO:0006378	0.000381	mRNA polyadenylation	14	BP	red
GO:0009875	0.000392	pollen-pistil interaction	11	BP	red
GO:0034661	0.000392	ncRNA catabolic process	12	BP	red
GO:2000242	0.000404	negative regulation of reproductive process	24	BP	red
GO:0031123	0.000408	RNA 3'-end processing	22	BP	red
GO:0048232	0.000408	male gamete generation	23	BP	red
GO:0016102	0.000412	diterpenoid biosynthetic process	17	BP	red
GO:0008361	0.000432	regulation of cell size	14	BP	red
GO:0007399	0.000441	nervous system development	23	BP	red
GO:0101005	0.000444	ubiquitinyl hydrolase activity	9	MF	red
GO:0007051	0.000457	spindle organization	17	BP	red
GO:0030898	0.000459	actin-dependent ATPase activity	11	MF	red
GO:0043531	0.000459	ADP binding	11	MF	red
GO:0070252	0.000459	actin-mediated cell contraction	11	BP	red
GO:0042327	0.000475	positive regulation of phosphorylation	27	BP	red
GO:0072583	0.000481	clathrin-dependent endocytosis	13	BP	red
GO:0006888	0.000482	endoplasmic reticulum to Golgi vesicle-mediated transport	19	BP	red
GO:0009750	0.000495	response to fructose	16	BP	red
GO:0000289	0.000496	nuclear-transcribed mRNA poly(A) tail shortening	7	BP	red
GO:0006369	0.000496	termination of RNA polymerase II transcription	7	BP	red
GO:0006473	0.000496	protein acetylation	20	BP	red
GO:0034204	0.000496	lipid translocation	8	BP	red
GO:0051924	0.000496	regulation of calcium ion transport	7	BP	red
GO:0055037	0.000496	recycling endosome	8	CC	red
GO:0072413	0.000496	signal transduction involved in mitotic cell cycle checkpoint	7	BP	red
GO:0097035	0.000496	regulation of membrane lipid distribution	8	BP	red
GO:1990752	0.000496	microtubule end	8	CC	red
GO:0004402	0.000505	histone acetyltransferase activity	10	MF	red
GO:0061733	0.000505	peptide-lysine-N-acetyltransferase activity	10	MF	red
GO:1990778	0.000505	protein localization to cell periphery	10	BP	red
GO:0006914	0.000512	autophagy	19	BP	red
GO:0061919	0.000512	process utilizing autophagic mechanism	19	BP	red
GO:0045787	0.000519	positive regulation of cell cycle	24	BP	red
GO:0010562	0.000522	positive regulation of phosphorus metabolic process	27	BP	red
GO:0045937	0.000522	positive regulation of phosphate metabolic process	27	BP	red
GO:0044877	0.000524	protein-containing complex binding	46	MF	red
GO:0048471	0.000535	perinuclear region of cytoplasm	17	CC	red
GO:0030838	0.000587	positive regulation of actin filament polymerization	12	BP	red
GO:0042277	0.00059	peptide binding	26	MF	red
GO:0016597	0.000604	amino acid binding	10	MF	red
GO:0000056	0.000611	ribosomal small subunit export from nucleus	5	BP	red
GO:1905952	0.000611	regulation of lipid localization	5	BP	red
GO:0007420	0.000647	brain development	9	BP	red
GO:0035257	0.000647	nuclear hormone receptor binding	9	MF	red
GO:0051427	0.000647	hormone receptor binding	9	MF	red
GO:0060322	0.000647	head development	9	BP	red
GO:0061912	0.000647	selective autophagy	9	BP	red
GO:0006904	0.000647	vesicle docking involved in exocytosis	7	BP	red
GO:0010586	0.000647	miRNA metabolic process	7	BP	red
GO:0051785	0.000647	positive regulation of nuclear division	7	BP	red
GO:0018393	0.000658	internal peptidyl-lysine acetylation	19	BP	red
GO:0018394	0.000658	peptidyl-lysine acetylation	19	BP	red
GO:0015629	0.000669	actin cytoskeleton	22	CC	red
GO:0043200	0.000681	response to amino acid	13	BP	red
GO:0003779	0.000698	actin binding	25	MF	red
GO:0015931	0.000738	nucleobase-containing compound transport	32	BP	red
GO:0010445	0.000748	nuclear dicing body	6	CC	red
GO:0015924	0.000748	mannosyl-oligosaccharide mannosidase activity	6	MF	red
GO:0006475	0.000786	internal protein amino acid acetylation	19	BP	red
GO:0010494	0.0008	cytoplasmic stress granule	16	CC	red
GO:0000280	0.000857	nuclear division	37	BP	red
GO:0048015	0.000859	phosphatidylinositol-mediated signaling	7	BP	red
GO:0048017	0.000859	inositol lipid-mediated signaling	7	BP	red
GO:0097190	0.000859	apoptotic signaling pathway	7	BP	red
GO:0030036	0.000862	actin cytoskeleton organization	26	BP	red
GO:0005543	0.000924	phospholipid binding	26	MF	red
GO:0001817	0.000991	regulation of cytokine production	10	BP	red
GO:0001927	0.000991	exocyst assembly	5	BP	red
GO:0007596	0.000991	blood coagulation	5	BP	red
GO:0007599	0.000991	hemostasis	5	BP	red
GO:0008540	0.000991	proteasome regulatory particle, base subcomplex	8	CC	red
GO:0015074	0.000991	DNA integration	5	BP	red
GO:0031931	0.000991	TORC1 complex	5	CC	red
GO:0038201	0.000991	TOR complex	5	CC	red
GO:0050817	0.000991	coagulation	5	BP	red
GO:0008168	0.001	methyltransferase activity	39	MF	red
GO:0010639	0.001036	negative regulation of organelle organization	26	BP	red
GO:0048508	0.001036	embryonic meristem development	17	BP	red
GO:0006336	0.001041	DNA replication-independent nucleosome assembly	6	BP	red
GO:0007286	0.001041	spermatid development	6	BP	red
GO:0016514	0.001041	SWI/SNF complex	6	CC	red
GO:0017070	0.001041	U6 snRNA binding	6	MF	red
GO:0048515	0.001041	spermatid differentiation	6	BP	red
GO:1903335	0.001041	regulation of vacuolar transport	6	BP	red
GO:0036503	0.001061	ERAD pathway	18	BP	red
GO:0045010	0.001093	actin nucleation	11	BP	red
GO:0004559	0.001095	alpha-mannosidase activity	7	MF	red
GO:0008409	0.001095	5'-3' exonuclease activity	7	MF	red
GO:1901652	0.001095	response to peptide	7	BP	red
GO:0001932	0.001113	regulation of protein phosphorylation	33	BP	red
GO:0031461	0.001113	cullin-RING ubiquitin ligase complex	36	CC	red
GO:0043066	0.001116	negative regulation of apoptotic process	12	BP	red
GO:0006644	0.001178	phospholipid metabolic process	39	BP	red
GO:0071029	0.001184	nuclear ncRNA surveillance	8	BP	red
GO:0071035	0.001184	nuclear polyadenylation-dependent rRNA catabolic process	8	BP	red
GO:0071046	0.001184	nuclear polyadenylation-dependent ncRNA catabolic process	8	BP	red
GO:0016741	0.001201	transferase activity, transferring one-carbon groups	40	MF	red
GO:0051129	0.00122	negative regulation of cellular component organization	29	BP	red
GO:0016410	0.001288	N-acyltransferase activity	14	MF	red
GO:0004712	0.001292	protein serine/threonine/tyrosine kinase activity	15	MF	red
GO:0031124	0.001292	mRNA 3'-end processing	15	BP	red
GO:0033674	0.001304	positive regulation of kinase activity	24	BP	red
GO:0034212	0.001334	peptide N-acetyltransferase activity	10	MF	red
GO:0022618	0.001336	ribonucleoprotein complex assembly	36	BP	red
GO:0072401	0.001398	signal transduction involved in DNA integrity checkpoint	7	BP	red
GO:0072422	0.001398	signal transduction involved in DNA damage checkpoint	7	BP	red
GO:2000045	0.001398	regulation of G1/S transition of mitotic cell cycle	7	BP	red
GO:0000329	0.001409	fungal-type vacuole membrane	6	CC	red
GO:0004438	0.001409	phosphatidylinositol-3-phosphatase activity	6	MF	red
GO:0042405	0.001409	nuclear inclusion body	6	CC	red
GO:0070628	0.001409	proteasome binding	6	MF	red
GO:0009685	0.001434	gibberellin metabolic process	17	BP	red
GO:0003994	0.001464	aconitate hydratase activity	5	MF	red
GO:0006110	0.001464	regulation of glycolytic process	5	BP	red
GO:0016624	0.001464	oxidoreductase activity, acting on the aldehyde or oxo group of donors, disulfide as acceptor	5	MF	red
GO:0030811	0.001464	regulation of nucleotide catabolic process	5	BP	red
GO:0032890	0.001464	regulation of organic acid transport	5	BP	red
GO:0043470	0.001464	regulation of carbohydrate catabolic process	5	BP	red
GO:0070070	0.001464	proton-transporting V-type ATPase complex assembly	5	BP	red
GO:0070072	0.001464	vacuolar proton-transporting V-type ATPase complex assembly	5	BP	red
GO:1901019	0.001464	regulation of calcium ion transmembrane transporter activity	5	BP	red
GO:1903578	0.001464	regulation of ATP metabolic process	5	BP	red
GO:2001169	0.001464	regulation of ATP biosynthetic process	5	BP	red
GO:0016592	0.001481	mediator complex	16	CC	red
GO:0006379	0.001499	mRNA cleavage	10	BP	red
GO:0051347	0.001499	positive regulation of transferase activity	26	BP	red
GO:0070063	0.001499	RNA polymerase binding	10	MF	red
GO:0090501	0.001499	RNA phosphodiester bond hydrolysis	30	BP	red
GO:2000243	0.001499	positive regulation of reproductive process	22	BP	red
GO:0005548	0.00153	phospholipid transporter activity	9	MF	red
GO:0008080	0.00157	N-acetyltransferase activity	12	MF	red
GO:0000226	0.001571	microtubule cytoskeleton organization	35	BP	red
GO:0080008	0.001603	Cul4-RING E3 ubiquitin ligase complex	22	CC	red
GO:2001233	0.001722	regulation of apoptotic signaling pathway	8	BP	red
GO:0017056	0.001723	structural constituent of nuclear pore	7	MF	red
GO:0140029	0.001723	exocytic process	7	BP	red
GO:0000792	0.001816	heterochromatin	9	CC	red
GO:0032886	0.001816	regulation of microtubule-based process	9	BP	red
GO:0048859	0.001816	formation of anatomical boundary	9	BP	red
GO:0009896	0.001852	positive regulation of catabolic process	23	BP	red
GO:0071826	0.001961	ribonucleoprotein complex subunit organization	36	BP	red
GO:0006302	0.001968	double-strand break repair	24	BP	red
GO:0009615	0.001968	response to virus	22	BP	red
GO:0045202	0.002025	synapse	10	CC	red
GO:0042770	0.002088	signal transduction in response to DNA damage	8	BP	red
GO:0048653	0.002148	anther development	17	BP	red
GO:0051050	0.002148	positive regulation of transport	17	BP	red
GO:0000380	0.002154	alternative mRNA splicing, via spliceosome	5	BP	red
GO:0010508	0.002154	positive regulation of autophagy	7	BP	red
GO:0035194	0.002154	post-transcriptional gene silencing by RNA	20	BP	red
GO:0043268	0.002154	positive regulation of potassium ion transport	5	BP	red
GO:0072395	0.002154	signal transduction involved in cell cycle checkpoint	7	BP	red
GO:0090306	0.002154	spindle assembly involved in meiosis	5	BP	red
GO:0071281	0.002238	cellular response to iron ion	19	BP	red
GO:0010564	0.002253	regulation of cell cycle process	31	BP	red
GO:0007276	0.002351	gamete generation	24	BP	red
GO:0005524	0.002355	ATP binding	32	MF	red
GO:0035619	0.002449	root hair tip	6	CC	red
GO:0043633	0.002492	polyadenylation-dependent RNA catabolic process	8	BP	red
GO:0043634	0.002492	polyadenylation-dependent ncRNA catabolic process	8	BP	red
GO:0080135	0.002661	regulation of cellular response to stress	24	BP	red
GO:0072659	0.002695	protein localization to plasma membrane	7	BP	red
GO:0022411	0.002808	cellular component disassembly	19	BP	red
GO:0005813	0.002823	centrosome	12	CC	red
GO:0051302	0.002823	regulation of cell division	26	BP	red
GO:0048467	0.002903	gynoecium development	22	BP	red
GO:0000819	0.002956	sister chromatid segregation	17	BP	red
GO:0072657	0.002956	protein localization to membrane	17	BP	red
GO:0016577	0.002996	histone demethylation	11	BP	red
GO:0070076	0.002996	histone lysine demethylation	11	BP	red
GO:0005849	0.003059	mRNA cleavage factor complex	10	CC	red
GO:0000212	0.003061	meiotic spindle organization	5	BP	red
GO:1903071	0.003061	positive regulation of ER-associated ubiquitin-dependent protein catabolic process	5	BP	red
GO:1904063	0.003061	negative regulation of cation transmembrane transport	5	BP	red
GO:1904294	0.003061	positive regulation of ERAD pathway	5	BP	red
GO:2001258	0.003061	negative regulation of cation channel activity	5	BP	red
GO:0016050	0.003141	vesicle organization	24	BP	red
GO:0016573	0.003148	histone acetylation	17	BP	red
GO:0045732	0.003148	positive regulation of protein catabolic process	15	BP	red
GO:0051646	0.003148	mitochondrion localization	6	BP	red
GO:1900034	0.003148	regulation of cellular response to heat	6	BP	red
GO:0007015	0.003258	actin filament organization	21	BP	red
GO:0032266	0.003261	phosphatidylinositol-3-phosphate binding	7	MF	red
GO:0070034	0.003261	telomerase RNA binding	7	MF	red
GO:0043087	0.003301	regulation of GTPase activity	18	BP	red
GO:0017053	0.003322	transcription repressor complex	11	CC	red
GO:0000578	0.003336	embryonic axis specification	9	BP	red
GO:0006482	0.003757	protein demethylation	11	BP	red
GO:0008214	0.003757	protein dealkylation	11	BP	red
GO:0044764	0.003757	multi-organism cellular process	15	BP	red
GO:0016485	0.003859	protein processing	12	BP	red
GO:0009900	0.00392	dehiscence	10	BP	red
GO:0140104	0.00392	molecular carrier activity	10	MF	red
GO:1904062	0.00392	regulation of cation transmembrane transport	10	BP	red
GO:0016441	0.003934	posttranscriptional gene silencing	21	BP	red
GO:0030119	0.004025	AP-type membrane coat adaptor complex	6	CC	red
GO:0001666	0.004032	response to hypoxia	23	BP	red
GO:0031334	0.004054	positive regulation of protein-containing complex assembly	15	BP	red
GO:0001102	0.004203	RNA polymerase II activating transcription factor binding	5	MF	red
GO:0015909	0.004203	long-chain fatty acid transport	5	BP	red
GO:0071012	0.004203	catalytic step 1 spliceosome	5	CC	red
GO:0035196	0.004445	production of miRNAs involved in gene silencing by miRNA	10	BP	red
GO:0007417	0.004455	central nervous system development	9	BP	red
GO:0015914	0.004455	phospholipid transport	9	BP	red
GO:0030587	0.004574	sorocarp development	13	BP	red
GO:0090702	0.004574	non-reproductive fruiting body development	13	BP	red
GO:0099120	0.004574	socially cooperative development	13	BP	red
GO:0043067	0.004699	regulation of programmed cell death	28	BP	red
GO:0048285	0.004781	organelle fission	42	BP	red
GO:0097346	0.004781	INO80-type complex	7	CC	red
GO:1902806	0.004781	regulation of cell cycle G1/S phase transition	7	BP	red
GO:1903706	0.004781	regulation of hemopoiesis	7	BP	red
GO:0042995	0.00485	cell projection	29	CC	red
GO:0120025	0.00485	plasma membrane bounded cell projection	29	CC	red
GO:0016896	0.00498	exoribonuclease activity, producing 5'-phosphomonoesters	10	MF	red
GO:0005776	0.004997	autophagosome	6	CC	red
GO:0016581	0.004997	NuRD complex	6	CC	red
GO:0035618	0.004997	root hair	6	CC	red
GO:0045815	0.004997	positive regulation of gene expression, epigenetic	6	BP	red
GO:0090545	0.004997	CHD-type complex	6	CC	red
GO:0008234	0.005024	cysteine-type peptidase activity	16	MF	red
GO:0071248	0.00514	cellular response to metal ion	22	BP	red
GO:1902275	0.005391	regulation of chromatin organization	19	BP	red
GO:0043085	0.005482	positive regulation of catalytic activity	42	BP	red
GO:0006013	0.005513	mannose metabolic process	5	BP	red
GO:0006140	0.005513	regulation of nucleotide metabolic process	5	BP	red
GO:0007346	0.005513	regulation of mitotic cell cycle	31	BP	red
GO:0008037	0.005513	cell recognition	8	BP	red
GO:0030808	0.005513	regulation of nucleotide biosynthetic process	5	BP	red
GO:0034756	0.005513	regulation of iron ion transport	5	BP	red
GO:0071013	0.005513	catalytic step 2 spliceosome	15	CC	red
GO:0097193	0.005513	intrinsic apoptotic signaling pathway	5	BP	red
GO:1900036	0.005513	positive regulation of cellular response to heat	5	BP	red
GO:1900371	0.005513	regulation of purine nucleotide biosynthetic process	5	BP	red
GO:1900542	0.005513	regulation of purine nucleotide metabolic process	5	BP	red
GO:1903725	0.005513	regulation of phospholipid metabolic process	5	BP	red
GO:0009901	0.00559	anther dehiscence	7	BP	red
GO:0030425	0.00559	dendrite	7	CC	red
GO:0097447	0.00559	dendritic tree	7	CC	red
GO:0005876	0.005615	spindle microtubule	11	CC	red
GO:0006101	0.005615	citrate metabolic process	9	BP	red
GO:0006497	0.005615	protein lipidation	9	BP	red
GO:0030674	0.005615	protein-macromolecule adaptor activity	9	MF	red
GO:0042158	0.005615	lipoprotein biosynthetic process	9	BP	red
GO:1901879	0.005615	regulation of protein depolymerization	9	BP	red
GO:0006898	0.005917	receptor-mediated endocytosis	14	BP	red
GO:0001934	0.006074	positive regulation of protein phosphorylation	23	BP	red
GO:0050994	0.006074	regulation of lipid catabolic process	6	BP	red
GO:0052744	0.006074	phosphatidylinositol monophosphate phosphatase activity	6	MF	red
GO:0004532	0.006109	exoribonuclease activity	10	MF	red
GO:0035542	0.00629	regulation of SNARE complex assembly	4	BP	red
GO:0043157	0.00629	response to cation stress	4	BP	red
GO:0043549	0.00629	regulation of kinase activity	28	BP	red
GO:0045022	0.00629	early endosome to late endosome transport	4	BP	red
GO:0051125	0.00629	regulation of actin nucleation	4	BP	red
GO:0051127	0.00629	positive regulation of actin nucleation	4	BP	red
GO:0051702	0.00629	interaction with symbiont	4	BP	red
GO:0051851	0.00629	modulation by host of symbiont process	4	BP	red
GO:0060151	0.00629	peroxisome localization	4	BP	red
GO:0071539	0.00629	protein localization to centrosome	4	BP	red
GO:0080119	0.00629	ER body organization	4	BP	red
GO:0098927	0.00629	vesicle-mediated transport between endosomal compartments	4	BP	red
GO:1905508	0.00629	protein localization to microtubule organizing center	4	BP	red
GO:1990817	0.00629	RNA adenylyltransferase activity	4	MF	red
GO:0010927	0.006483	cellular component assembly involved in morphogenesis	16	BP	red
GO:0043270	0.006483	positive regulation of ion transport	7	BP	red
GO:0044773	0.006483	mitotic DNA damage checkpoint	7	BP	red
GO:0042393	0.006683	histone binding	18	MF	red
GO:0009880	0.006727	embryonic pattern specification	10	BP	red
GO:0016796	0.006782	exonuclease activity, active with either ribo- or deoxyribonucleic acids and producing 5'-phosphomonoesters	11	MF	red
GO:0007059	0.00698	chromosome segregation	23	BP	red
GO:0008420	0.00698	RNA polymerase II CTD heptapeptide repeat phosphatase activity	5	MF	red
GO:0016926	0.00698	protein desumoylation	5	BP	red
GO:0016929	0.00698	SUMO-specific protease activity	5	MF	red
GO:0033218	0.00698	amide binding	26	MF	red
GO:0043968	0.00698	histone H2A acetylation	5	BP	red
GO:0070137	0.00698	ubiquitin-like protein-specific endopeptidase activity	5	MF	red
GO:0070139	0.00698	SUMO-specific endopeptidase activity	5	MF	red
GO:0070940	0.00698	dephosphorylation of RNA polymerase II C-terminal domain	5	BP	red
GO:0007041	0.007071	lysosomal transport	8	BP	red
GO:0031597	0.007071	cytosolic proteasome complex	8	CC	red
GO:0032182	0.007139	ubiquitin-like protein binding	12	MF	red
GO:0071472	0.007139	cellular response to salt stress	12	BP	red
GO:0006491	0.007201	N-glycan processing	6	BP	red
GO:0034629	0.007201	cellular protein-containing complex localization	6	BP	red
GO:0034724	0.007201	DNA replication-independent nucleosome organization	6	BP	red
GO:0043409	0.007201	negative regulation of MAPK cascade	6	BP	red
GO:0010039	0.00738	response to iron ion	19	BP	red
GO:0004540	0.007421	ribonuclease activity	21	MF	red
GO:0033044	0.007421	regulation of chromosome organization	27	BP	red
GO:0000726	0.007499	non-recombinational repair	7	BP	red
GO:0006303	0.007499	double-strand break repair via nonhomologous end joining	7	BP	red
GO:0006661	0.007499	phosphatidylinositol biosynthetic process	7	BP	red
GO:0016607	0.007995	nuclear speck	25	CC	red
GO:0030834	0.008088	regulation of actin filament depolymerization	8	BP	red
GO:0008380	0.008102	RNA splicing	39	BP	red
GO:0045834	0.008235	positive regulation of lipid metabolic process	10	BP	red
GO:0009746	0.008315	response to hexose	19	BP	red
GO:0000055	0.008724	ribosomal large subunit export from nucleus	5	BP	red
GO:0000244	0.008724	spliceosomal tri-snRNP complex assembly	5	BP	red
GO:0000422	0.008724	autophagy of mitochondrion	7	BP	red
GO:0001736	0.008724	establishment of planar polarity	5	BP	red
GO:0001738	0.008724	morphogenesis of a polarized epithelium	5	BP	red
GO:0006517	0.008724	protein deglycosylation	5	BP	red
GO:0007062	0.008724	sister chromatid cohesion	9	BP	red
GO:0010452	0.008724	histone H3-K36 methylation	5	BP	red
GO:0012510	0.008724	trans-Golgi network transport vesicle membrane	5	CC	red
GO:0033613	0.008724	activating transcription factor binding	6	MF	red
GO:0045472	0.008724	response to ether	4	BP	red
GO:0051261	0.008724	protein depolymerization	7	BP	red
GO:0051409	0.008724	response to nitrosative stress	4	BP	red
GO:0051446	0.008724	positive regulation of meiotic cell cycle	6	BP	red
GO:0051601	0.008724	exocyst localization	5	BP	red
GO:0060236	0.008724	regulation of mitotic spindle organization	4	BP	red
GO:0061726	0.008724	mitochondrion disassembly	7	BP	red
GO:0090224	0.008724	regulation of spindle organization	4	BP	red
GO:1902417	0.008724	(+)-abscisic acid D-glucopyranosyl ester transmembrane transporter activity	4	MF	red
GO:1902418	0.008724	(+)-abscisic acid D-glucopyranosyl ester transmembrane transport	4	BP	red
GO:1904643	0.008724	response to curcumin	4	BP	red
GO:0005938	0.008891	cell cortex	28	CC	red
GO:0050000	0.008931	chromosome localization	10	BP	red
GO:0090503	0.008931	RNA phosphodiester bond hydrolysis, exonucleolytic	10	BP	red
GO:0070482	0.009083	response to oxygen levels	24	BP	red
GO:0043408	0.009118	regulation of MAPK cascade	13	BP	red
GO:0006935	0.009288	chemotaxis	15	BP	red
GO:0021700	0.009537	developmental maturation	38	BP	red
GO:0044728	0.009934	DNA methylation or demethylation	13	BP	red
GO:0045003	0.010112	double-strand break repair via synthesis-dependent strand annealing	7	BP	red
GO:0005838	0.010302	proteasome regulatory particle	8	CC	red
GO:0016075	0.010302	rRNA catabolic process	8	BP	red
GO:0022624	0.010302	proteasome accessory complex	8	CC	red
GO:0031053	0.010302	primary miRNA processing	6	BP	red
GO:0045335	0.010302	phagocytic vesicle	6	CC	red
GO:0010941	0.010345	regulation of cell death	32	BP	red
GO:0098813	0.0106	nuclear chromosome segregation	21	BP	red
GO:0042330	0.010694	taxis	15	BP	red
GO:0005697	0.010951	telomerase holoenzyme complex	5	CC	red
GO:0007164	0.010951	establishment of tissue polarity	5	BP	red
GO:0031929	0.010951	TOR signaling	5	BP	red
GO:0050878	0.010951	regulation of body fluid levels	5	BP	red
GO:0070071	0.010951	proton-transporting two-sector ATPase complex assembly	5	BP	red
GO:0080111	0.010951	DNA demethylation	5	BP	red
GO:1901991	0.010951	negative regulation of mitotic cell cycle phase transition	9	BP	red
GO:0042176	0.011352	regulation of protein catabolic process	17	BP	red
GO:0043331	0.011402	response to dsRNA	15	BP	red
GO:0034284	0.011418	response to monosaccharide	19	BP	red
GO:0030532	0.011423	small nuclear ribonucleoprotein complex	16	CC	red
GO:0090150	0.011492	establishment of protein localization to membrane	13	BP	red
GO:0031152	0.011495	aggregation involved in sorocarp development	7	BP	red
GO:0031624	0.011495	ubiquitin conjugating enzyme binding	8	MF	red
GO:0036477	0.011495	somatodendritic compartment	7	CC	red
GO:0044774	0.011495	mitotic DNA integrity checkpoint	7	BP	red
GO:0071027	0.011495	nuclear RNA surveillance	8	BP	red
GO:0098630	0.011495	aggregation of unicellular organisms	7	BP	red
GO:0098743	0.011495	cell aggregation	7	BP	red
GO:0045930	0.011533	negative regulation of mitotic cell cycle	12	BP	red
GO:0000398	0.011687	mRNA splicing, via spliceosome	28	BP	red
GO:0001227	0.011687	DNA-binding transcription repressor activity, RNA polymerase II-specific	4	MF	red
GO:0003871	0.011687	5-methyltetrahydropteroyltriglutamate-homocysteine S-methyltransferase activity	4	MF	red
GO:0008705	0.011687	methionine synthase activity	4	MF	red
GO:0010372	0.011687	positive regulation of gibberellin biosynthetic process	4	BP	red
GO:0030124	0.011687	AP-4 adaptor complex	4	CC	red
GO:0032183	0.011687	SUMO binding	4	MF	red
GO:0042084	0.011687	5-methyltetrahydrofolate-dependent methyltransferase activity	4	MF	red
GO:0042085	0.011687	5-methyltetrahydropteroyltri-L-glutamate-dependent methyltransferase activity	4	MF	red
GO:0043630	0.011687	ncRNA polyadenylation involved in polyadenylation-dependent ncRNA catabolic process	4	BP	red
GO:0052742	0.011687	phosphatidylinositol kinase activity	4	MF	red
GO:0072553	0.011687	terminal button organization	4	BP	red
GO:0099172	0.011687	presynapse organization	4	BP	red
GO:0000993	0.011902	RNA polymerase II complex binding	6	MF	red
GO:0043175	0.011902	RNA polymerase core enzyme binding	6	MF	red
GO:0032434	0.012263	regulation of proteasomal ubiquitin-dependent protein catabolic process	11	BP	red
GO:2000058	0.012263	regulation of ubiquitin-dependent protein catabolic process	11	BP	red
GO:0030554	0.01248	adenyl nucleotide binding	33	MF	red
GO:0032559	0.01248	adenyl ribonucleotide binding	33	MF	red
GO:0120114	0.012655	Sm-like protein family complex	16	CC	red
GO:0051346	0.012681	negative regulation of hydrolase activity	15	BP	red
GO:0007093	0.012938	mitotic cell cycle checkpoint	10	BP	red
GO:0043009	0.013031	chordate embryonic development	7	BP	red
GO:0000974	0.013064	Prp19 complex	5	CC	red
GO:0005769	0.013064	early endosome	19	CC	red
GO:0008375	0.013064	acetylglucosaminyltransferase activity	5	MF	red
GO:0017110	0.013064	nucleoside-diphosphatase activity	5	MF	red
GO:0032453	0.013064	histone demethylase activity (H3-K4 specific)	5	MF	red
GO:0035267	0.013064	NuA4 histone acetyltransferase complex	5	CC	red
GO:0043189	0.013064	H4/H2A histone acetyltransferase complex	5	CC	red
GO:0051338	0.013064	regulation of transferase activity	30	BP	red
GO:0072350	0.013064	tricarboxylic acid metabolic process	9	BP	red
GO:0140014	0.013064	mitotic nuclear division	17	BP	red
GO:1902562	0.013064	H4 histone acetyltransferase complex	5	CC	red
GO:1903320	0.013064	regulation of protein modification by small protein conjugation or removal	9	BP	red
GO:1905898	0.013064	positive regulation of response to endoplasmic reticulum stress	5	BP	red
GO:2001242	0.013064	regulation of intrinsic apoptotic signaling pathway	5	BP	red
GO:0051781	0.013152	positive regulation of cell division	11	BP	red
GO:0051015	0.013231	actin filament binding	16	MF	red
GO:0004843	0.013896	thiol-dependent ubiquitin-specific protease activity	6	MF	red
GO:0034593	0.014029	phosphatidylinositol bisphosphate phosphatase activity	10	MF	red
GO:0043230	0.014167	extracellular organelle	8	CC	red
GO:0045862	0.014167	positive regulation of proteolysis	14	BP	red
GO:0070062	0.014167	extracellular exosome	8	CC	red
GO:1903561	0.014167	extracellular vesicle	8	CC	red
GO:0008170	0.014206	N-methyltransferase activity	15	MF	red
GO:0009911	0.014916	positive regulation of flower development	13	BP	red
GO:0003682	0.015075	chromatin binding	30	MF	red
GO:0022604	0.015148	regulation of cell morphogenesis	21	BP	red
GO:0000798	0.015168	nuclear cohesin complex	4	CC	red
GO:0002090	0.015168	regulation of receptor internalization	4	BP	red
GO:0002092	0.015168	positive regulation of receptor internalization	4	BP	red
GO:0009100	0.015168	glycoprotein metabolic process	23	BP	red
GO:0036293	0.015168	response to decreased oxygen levels	23	BP	red
GO:0042946	0.015168	glucoside transport	4	BP	red
GO:0042947	0.015168	glucoside transmembrane transporter activity	4	MF	red
GO:0045860	0.015168	positive regulation of protein kinase activity	20	BP	red
GO:0048259	0.015168	regulation of receptor-mediated endocytosis	4	BP	red
GO:0048260	0.015168	positive regulation of receptor-mediated endocytosis	4	BP	red
GO:0051645	0.015168	Golgi localization	4	BP	red
GO:0070577	0.015168	lysine-acetylated histone binding	4	MF	red
GO:0097327	0.015168	response to antineoplastic agent	4	BP	red
GO:0140033	0.015168	acetylation-dependent protein binding	4	MF	red
GO:1901656	0.015168	glycoside transport	4	BP	red
GO:0032875	0.015718	regulation of DNA endoreduplication	8	BP	red
GO:0043244	0.015764	regulation of protein-containing complex disassembly	9	BP	red
GO:0000812	0.015768	Swr1 complex	5	CC	red
GO:0043434	0.015768	response to peptide hormone	5	BP	red
GO:0051353	0.015768	positive regulation of oxidoreductase activity	5	BP	red
GO:0000324	0.015939	fungal-type vacuole	6	CC	red
GO:0031312	0.015939	extrinsic component of organelle membrane	6	CC	red
GO:0031346	0.015939	positive regulation of cell projection organization	6	BP	red
GO:0048194	0.015939	Golgi vesicle budding	6	BP	red
GO:0030258	0.01612	lipid modification	24	BP	red
GO:0036002	0.01647	pre-mRNA binding	7	MF	red
GO:0017022	0.017409	myosin binding	9	MF	red
GO:0010267	0.017496	production of ta-siRNAs involved in RNA interference	8	BP	red
GO:0043473	0.017496	pigmentation	8	BP	red
GO:0071025	0.017496	RNA surveillance	8	BP	red
GO:0098586	0.017496	cellular response to virus	8	BP	red
GO:0051240	0.018074	positive regulation of multicellular organismal process	34	BP	red
GO:0031122	0.018215	cytoplasmic microtubule organization	14	BP	red
GO:0071241	0.018558	cellular response to inorganic substance	22	BP	red
GO:0008757	0.018603	S-adenosylmethionine-dependent methyltransferase activity	29	MF	red
GO:0080001	0.018774	mucilage extrusion from seed coat	7	BP	red
GO:0035280	0.019056	miRNA loading onto RISC involved in gene silencing by miRNA	5	BP	red
GO:0043023	0.019056	ribosomal large subunit binding	5	MF	red
GO:0051010	0.019056	microtubule plus-end binding	5	MF	red
GO:0070922	0.019056	small RNA loading onto RISC	5	BP	red
GO:0097157	0.019056	pre-mRNA intronic binding	5	MF	red
GO:1901988	0.019058	negative regulation of cell cycle phase transition	9	BP	red
GO:0006275	0.019321	regulation of DNA replication	13	BP	red
GO:0000973	0.019555	posttranscriptional tethering of RNA polymerase II gene DNA at nuclear periphery	4	BP	red
GO:0034397	0.019555	telomere localization	4	BP	red
GO:0034398	0.019555	telomere tethering at nuclear periphery	4	BP	red
GO:1990841	0.019555	promoter-specific chromatin binding	4	MF	red
GO:0032436	0.019562	positive regulation of proteasomal ubiquitin-dependent protein catabolic process	10	BP	red
GO:0000377	0.019849	RNA splicing, via transesterification reactions with bulged adenosine as nucleophile	29	BP	red
GO:0032984	0.020309	protein-containing complex disassembly	12	BP	red
GO:0042594	0.020452	response to starvation	34	BP	red
GO:0048586	0.02062	regulation of long-day photoperiodism, flowering	13	BP	red
GO:0005682	0.021012	U5 snRNP	7	CC	red
GO:0015923	0.021012	mannosidase activity	7	MF	red
GO:0016246	0.021012	RNA interference	11	BP	red
GO:0030422	0.021012	production of siRNA involved in RNA interference	11	BP	red
GO:0031072	0.021012	heat shock protein binding	7	MF	red
GO:0000049	0.02132	tRNA binding	6	MF	red
GO:0001098	0.02132	basal transcription machinery binding	6	MF	red
GO:0001099	0.02132	basal RNA polymerase II transcription machinery binding	6	MF	red
GO:0061061	0.02132	muscle structure development	6	BP	red
GO:0034976	0.022483	response to endoplasmic reticulum stress	21	BP	red
GO:0006102	0.022591	isocitrate metabolic process	5	BP	red
GO:0010330	0.022591	cellulose synthase complex	5	CC	red
GO:0030619	0.022591	U1 snRNA binding	5	MF	red
GO:0030865	0.022591	cortical cytoskeleton organization	15	BP	red
GO:0051241	0.022591	negative regulation of multicellular organismal process	32	BP	red
GO:1904064	0.022591	positive regulation of cation transmembrane transport	5	BP	red
GO:0000375	0.022764	RNA splicing, via transesterification reactions	29	BP	red
GO:0052866	0.023028	phosphatidylinositol phosphate phosphatase activity	10	MF	red
GO:0045927	0.023097	positive regulation of growth	14	BP	red
GO:0000075	0.023178	cell cycle checkpoint	12	BP	red
GO:0005795	0.023178	Golgi stack	12	CC	red
GO:0046777	0.023458	protein autophosphorylation	37	BP	red
GO:0010216	0.023509	maintenance of DNA methylation	7	BP	red
GO:0030139	0.023688	endocytic vesicle	8	CC	red
GO:0030863	0.024547	cortical cytoskeleton	14	CC	red
GO:0030951	0.024547	establishment or maintenance of microtubule cytoskeleton polarity	4	BP	red
GO:0030952	0.024547	establishment or maintenance of cytoskeleton polarity	4	BP	red
GO:0031010	0.024547	ISWI-type complex	4	CC	red
GO:0036064	0.024547	ciliary basal body	4	CC	red
GO:0080171	0.024547	lytic vacuole organization	4	BP	red
GO:0009798	0.024768	axis specification	13	BP	red
GO:0042157	0.024768	lipoprotein metabolic process	9	BP	red
GO:0045995	0.02624	regulation of embryonic development	8	BP	red
GO:0006304	0.026505	DNA modification	13	BP	red
GO:0031080	0.026505	nuclear pore outer ring	5	CC	red
GO:0035371	0.026505	microtubule plus-end	5	CC	red
GO:0048497	0.026505	maintenance of floral organ identity	5	BP	red
GO:0060211	0.026505	regulation of nuclear-transcribed mRNA poly(A) tail shortening	5	BP	red
GO:0090700	0.026505	maintenance of plant organ identity	5	BP	red
GO:1900151	0.026505	regulation of nuclear-transcribed mRNA catabolic process, deadenylation-dependent decay	5	BP	red
GO:1903069	0.026505	regulation of ER-associated ubiquitin-dependent protein catabolic process	5	BP	red
GO:1904292	0.026505	regulation of ERAD pathway	5	BP	red
GO:0048581	0.026969	negative regulation of post-embryonic development	24	BP	red
GO:2000060	0.026969	positive regulation of ubiquitin-dependent protein catabolic process	9	BP	red
GO:1903311	0.027034	regulation of mRNA metabolic process	20	BP	red
GO:0009867	0.027645	jasmonic acid mediated signaling pathway	19	BP	red
GO:0043487	0.027902	regulation of RNA stability	11	BP	red
GO:0043021	0.028002	ribonucleoprotein complex binding	13	MF	red
GO:0016101	0.028311	diterpenoid metabolic process	17	BP	red
GO:0030182	0.02904	neuron differentiation	10	BP	red
GO:0031331	0.029515	positive regulation of cellular catabolic process	18	BP	red
GO:0001558	0.03039	regulation of cell growth	22	BP	red
GO:0016849	0.030427	phosphorus-oxygen lyase activity	4	MF	red
GO:0043570	0.030427	maintenance of DNA repeat elements	4	BP	red
GO:0044614	0.030427	nuclear pore cytoplasmic filaments	4	CC	red
GO:0050667	0.030427	homocysteine metabolic process	4	BP	red
GO:0090436	0.030427	leaf pavement cell development	4	BP	red
GO:0009825	0.030755	multidimensional cell growth	14	BP	red
GO:0071470	0.030755	cellular response to osmotic stress	14	BP	red
GO:0010364	0.030911	regulation of ethylene biosynthetic process	5	BP	red
GO:0031335	0.030911	regulation of sulfur amino acid metabolic process	5	BP	red
GO:0034656	0.030911	nucleobase-containing small molecule catabolic process	5	BP	red
GO:0046825	0.030911	regulation of protein export from nucleus	5	BP	red
GO:1900407	0.030911	regulation of cellular response to oxidative stress	5	BP	red
GO:1900908	0.030911	regulation of olefin metabolic process	5	BP	red
GO:1900911	0.030911	regulation of olefin biosynthetic process	5	BP	red
GO:0052543	0.031061	callose deposition in cell wall	10	BP	red
GO:0090351	0.031206	seedling development	24	BP	red
GO:0048768	0.031269	root hair cell tip growth	6	BP	red
GO:0048481	0.031364	plant ovule development	13	BP	red
GO:0031570	0.031635	DNA integrity checkpoint	9	BP	red
GO:0060090	0.031635	molecular adaptor activity	9	MF	red
GO:0006487	0.031772	protein N-linked glycosylation	11	BP	red
GO:0044089	0.031967	positive regulation of cellular component biogenesis	18	BP	red
GO:0002020	0.032189	protease binding	7	MF	red
GO:0042023	0.032189	DNA endoreduplication	7	BP	red
GO:0051321	0.032398	meiotic cell cycle	27	BP	red
GO:0060341	0.032699	regulation of cellular localization	19	BP	red
GO:0006418	0.033937	tRNA aminoacylation for protein translation	12	BP	red
GO:0008285	0.033937	negative regulation of cell population proliferation	12	BP	red
GO:0010152	0.034208	pollen maturation	8	BP	red
GO:0035639	0.034568	purine ribonucleoside triphosphate binding	35	MF	red
GO:0000387	0.035355	spliceosomal snRNP assembly	6	BP	red
GO:0033169	0.035355	histone H3-K9 demethylation	6	BP	red
GO:0008154	0.035657	actin polymerization or depolymerization	7	BP	red
GO:0030014	0.035657	CCR4-NOT complex	5	CC	red
GO:0030015	0.035657	CCR4-NOT core complex	5	CC	red
GO:0034720	0.035657	histone H3-K4 demethylation	5	BP	red
GO:0043618	0.035657	regulation of transcription from RNA polymerase II promoter in response to stress	5	BP	red
GO:0045786	0.035657	negative regulation of cell cycle	17	BP	red
GO:0071260	0.035657	cellular response to mechanical stimulus	5	BP	red
GO:1901880	0.035657	negative regulation of protein depolymerization	7	BP	red
GO:0004812	0.035819	aminoacyl-tRNA ligase activity	12	MF	red
GO:0006869	0.035819	lipid transport	16	BP	red
GO:0008299	0.035819	isoprenoid biosynthetic process	24	BP	red
GO:0016875	0.035819	ligase activity, forming carbon-oxygen bonds	12	MF	red
GO:0048764	0.036121	trichoblast maturation	22	BP	red
GO:0048765	0.036121	root hair cell differentiation	22	BP	red
GO:0048438	0.036205	floral whorl development	33	BP	red
GO:0007019	0.036224	microtubule depolymerization	4	BP	red
GO:0031936	0.036224	negative regulation of chromatin silencing	4	BP	red
GO:0045807	0.036224	positive regulation of endocytosis	4	BP	red
GO:0046931	0.036224	pore complex assembly	4	BP	red
GO:0051292	0.036224	nuclear pore complex assembly	4	BP	red
GO:1902446	0.036224	regulation of shade avoidance	4	BP	red
GO:0031050	0.036787	dsRNA processing	13	BP	red
GO:0070918	0.036787	production of small RNA involved in gene silencing by RNA	13	BP	red
GO:0048868	0.038348	pollen tube development	24	BP	red
GO:0007018	0.038824	microtubule-based movement	20	BP	red
GO:0140013	0.038824	meiotic nuclear division	20	BP	red
GO:0043484	0.03974	regulation of RNA splicing	15	BP	red
GO:0003712	0.040571	transcription coregulator activity	20	MF	red
GO:0000407	0.040589	phagophore assembly site	5	CC	red
GO:0007035	0.040589	vacuolar acidification	5	BP	red
GO:0031023	0.040589	microtubule organizing center organization	5	BP	red
GO:0035510	0.040589	DNA dealkylation	5	BP	red
GO:0035973	0.040589	aggrephagy	5	BP	red
GO:0042060	0.040589	wound healing	5	BP	red
GO:0051093	0.040589	negative regulation of developmental process	33	BP	red
GO:0051452	0.040589	intracellular pH reduction	5	BP	red
GO:0060491	0.040589	regulation of cell projection assembly	5	BP	red
GO:0120032	0.040589	regulation of plasma membrane bounded cell projection assembly	5	BP	red
GO:2001257	0.040589	regulation of cation channel activity	5	BP	red
GO:0010286	0.040605	heat acclimation	10	BP	red
GO:0090329	0.04064	regulation of DNA-dependent DNA replication	11	BP	red
GO:0071359	0.041007	cellular response to dsRNA	13	BP	red
GO:0010054	0.041621	trichoblast differentiation	22	BP	red
GO:0051052	0.041661	regulation of DNA metabolic process	25	BP	red
GO:0005102	0.042315	signaling receptor binding	24	MF	red
GO:0043038	0.042384	amino acid activation	12	BP	red
GO:0043039	0.042384	tRNA aminoacylation	12	BP	red
GO:0000291	0.0433	nuclear-transcribed mRNA catabolic process, exonucleolytic	8	BP	red
GO:0005797	0.0433	Golgi medial cisterna	4	CC	red
GO:0006283	0.0433	transcription-coupled nucleotide-excision repair	4	BP	red
GO:0008278	0.0433	cohesin complex	4	CC	red
GO:0008360	0.0433	regulation of cell shape	10	BP	red
GO:0031048	0.0433	heterochromatin assembly by small RNA	4	BP	red
GO:0042162	0.0433	telomeric DNA binding	8	MF	red
GO:0018196	0.043316	peptidyl-asparagine modification	6	BP	red
GO:0018279	0.043316	protein N-linked glycosylation via asparagine	6	BP	red
GO:0051604	0.043327	protein maturation	14	BP	red
GO:0000290	0.044394	deadenylation-dependent decapping of nuclear-transcribed mRNA	3	BP	red
GO:0006622	0.044394	protein targeting to lysosome	3	BP	red
GO:0010068	0.044394	protoderm histogenesis	3	BP	red
GO:0010071	0.044394	root meristem specification	3	BP	red
GO:0010595	0.044394	positive regulation of endothelial cell migration	3	BP	red
GO:0010634	0.044394	positive regulation of epithelial cell migration	3	BP	red
GO:0030875	0.044394	rDNA protrusion	3	CC	red
GO:0032877	0.044394	positive regulation of DNA endoreduplication	3	BP	red
GO:0042765	0.044394	GPI-anchor transamidase complex	3	CC	red
GO:0051014	0.044394	actin filament severing	3	BP	red
GO:0051489	0.044394	regulation of filopodium assembly	3	BP	red
GO:0051491	0.044394	positive regulation of filopodium assembly	3	BP	red
GO:0051783	0.044394	regulation of nuclear division	12	BP	red
GO:0061462	0.044394	protein localization to lysosome	3	BP	red
GO:0071014	0.044394	post-mRNA release spliceosomal complex	3	CC	red
GO:0071391	0.044394	cellular response to estrogen stimulus	3	BP	red
GO:0072332	0.044394	intrinsic apoptotic signaling pathway by p53 class mediator	3	BP	red
GO:0120034	0.044394	positive regulation of plasma membrane bounded cell projection assembly	3	BP	red
GO:2000249	0.044394	regulation of actin cytoskeleton reorganization	3	BP	red
GO:2000251	0.044394	positive regulation of actin cytoskeleton reorganization	3	BP	red
GO:2001234	0.044394	negative regulation of apoptotic signaling pathway	3	BP	red
GO:0035670	0.044724	plant-type ovary development	13	BP	red
GO:1903046	0.04503	meiotic cell cycle process	25	BP	red
GO:0010324	0.045138	membrane invagination	5	BP	red
GO:0032410	0.045138	negative regulation of transporter activity	5	BP	red
GO:0032413	0.045138	negative regulation of ion transmembrane transporter activity	5	BP	red
GO:0034763	0.045138	negative regulation of transmembrane transport	5	BP	red
GO:0034766	0.045138	negative regulation of ion transmembrane transport	5	BP	red
GO:0099024	0.045138	plasma membrane invagination	5	BP	red
GO:0035295	0.045196	tube development	10	BP	red
GO:0010563	0.046331	negative regulation of phosphorus metabolic process	12	BP	red
GO:0045936	0.046331	negative regulation of phosphate metabolic process	12	BP	red
GO:0006879	0.047228	cellular iron ion homeostasis	6	BP	red
GO:0043271	0.047228	negative regulation of ion transport	6	BP	red
GO:0051084	0.047228	de novo' posttranslational protein folding	6	BP	red
GO:0005819	0.047404	spindle	20	CC	red
GO:0034765	0.047604	regulation of ion transmembrane transport	11	BP	red
GO:0048579	0.047856	negative regulation of long-day photoperiodism, flowering	9	BP	red
GO:0048443	0.049323	stamen development	20	BP	red
GO:0048466	0.049323	androecium development	20	BP	red
GO:0007127	0.049511	meiosis I	13	BP	red
GO:0001103	0.04979	RNA polymerase II repressing transcription factor binding	4	MF	red
GO:0006903	0.04979	vesicle targeting	4	BP	red
GO:0008172	0.04979	S-methyltransferase activity	4	MF	red
GO:0009920	0.04979	cell plate formation involved in plant-type cell wall biogenesis	4	BP	red
GO:0043242	0.04979	negative regulation of protein-containing complex disassembly	7	BP	red
GO:0043629	0.04979	ncRNA polyadenylation	4	BP	red
GO:0044088	0.04979	regulation of vacuole organization	4	BP	red
GO:0048524	0.04979	positive regulation of viral process	4	BP	red
GO:0000976	1.09e-14	transcription regulatory region sequence-specific DNA binding	98	MF	turquoise
GO:0006366	1.09e-14	transcription by RNA polymerase II	110	BP	turquoise
GO:0001228	1.98e-13	DNA-binding transcription activator activity, RNA polymerase II-specific	59	MF	turquoise
GO:0045944	1.17e-12	positive regulation of transcription by RNA polymerase II	103	BP	turquoise
GO:0001046	7.84e-11	core promoter sequence-specific DNA binding	29	MF	turquoise
GO:1990837	2.96e-10	sequence-specific double-stranded DNA binding	103	MF	turquoise
GO:0010272	4.61e-08	response to silver ion	19	BP	turquoise
GO:0071217	4.61e-08	cellular response to external biotic stimulus	19	BP	turquoise
GO:0009909	1.9e-07	regulation of flower development	106	BP	turquoise
GO:0010228	4.59e-07	vegetative to reproductive phase transition of meristem	92	BP	turquoise
GO:0009624	5.37e-07	response to nematode	69	BP	turquoise
GO:0048573	6.8e-07	photoperiodism, flowering	54	BP	turquoise
GO:2000024	1.3e-06	regulation of leaf development	58	BP	turquoise
GO:0009648	3.18e-06	photoperiodism	56	BP	turquoise
GO:0000981	4.16e-06	DNA-binding transcription factor activity, RNA polymerase II-specific	87	MF	turquoise
GO:0046982	1.15e-05	protein heterodimerization activity	44	MF	turquoise
GO:0000160	1.97e-05	phosphorelay signal transduction system	60	BP	turquoise
GO:0009873	3.03e-05	ethylene-activated signaling pathway	47	BP	turquoise
GO:0035690	3.03e-05	cellular response to drug	56	BP	turquoise
GO:0009862	3.28e-05	systemic acquired resistance, salicylic acid mediated signaling pathway	20	BP	turquoise
GO:0007623	4.42e-05	circadian rhythm	66	BP	turquoise
GO:0048511	4.42e-05	rhythmic process	66	BP	turquoise
GO:0071407	5.53e-05	cellular response to organic cyclic compound	82	BP	turquoise
GO:0046898	6.88e-05	response to cycloheximide	20	BP	turquoise
GO:0060992	6.88e-05	response to fungicide	20	BP	turquoise
GO:0009751	7.03e-05	response to salicylic acid	94	BP	turquoise
GO:0002253	8.61e-05	activation of immune response	46	BP	turquoise
GO:0071446	9.05e-05	cellular response to salicylic acid stimulus	34	BP	turquoise
GO:0009863	9.4e-05	salicylic acid mediated signaling pathway	27	BP	turquoise
GO:0051094	9.4e-05	positive regulation of developmental process	98	BP	turquoise
GO:0071369	9.4e-05	cellular response to ethylene stimulus	55	BP	turquoise
GO:0071216	0.0001	cellular response to biotic stimulus	25	BP	turquoise
GO:0080050	0.000106	regulation of seed development	37	BP	turquoise
GO:0032269	0.000132	negative regulation of cellular protein metabolic process	84	BP	turquoise
GO:0002684	0.000152	positive regulation of immune system process	61	BP	turquoise
GO:0003682	0.000152	chromatin binding	81	MF	turquoise
GO:0002682	0.000176	regulation of immune system process	98	BP	turquoise
GO:0050778	0.000185	positive regulation of immune response	58	BP	turquoise
GO:0071395	0.000202	cellular response to jasmonic acid stimulus	59	BP	turquoise
GO:0009867	0.000203	jasmonic acid mediated signaling pathway	53	BP	turquoise
GO:0071236	0.000222	cellular response to antibiotic	38	BP	turquoise
GO:0051248	0.000227	negative regulation of protein metabolic process	85	BP	turquoise
GO:0006376	0.000264	mRNA splice site selection	15	BP	turquoise
GO:0048509	0.000275	regulation of meristem development	78	BP	turquoise
GO:0008134	0.000368	transcription factor binding	68	MF	turquoise
GO:0009292	0.000368	genetic transfer	24	BP	turquoise
GO:0009294	0.000368	DNA mediated transformation	24	BP	turquoise
GO:0009739	0.000368	response to gibberellin	74	BP	turquoise
GO:0050776	0.000404	regulation of immune response	84	BP	turquoise
GO:0080113	0.000404	regulation of seed growth	21	BP	turquoise
GO:0009639	0.000413	response to red or far red light	92	BP	turquoise
GO:0002218	0.000423	activation of innate immune response	42	BP	turquoise
GO:0009738	0.000518	abscisic acid-activated signaling pathway	69	BP	turquoise
GO:0000302	0.00054	response to reactive oxygen species	89	BP	turquoise
GO:0031349	0.000554	positive regulation of defense response	63	BP	turquoise
GO:0071215	0.000624	cellular response to abscisic acid stimulus	79	BP	turquoise
GO:0097306	0.000624	cellular response to alcohol	79	BP	turquoise
GO:0010337	0.000724	regulation of salicylic acid metabolic process	14	BP	turquoise
GO:2001057	0.00092	reactive nitrogen species metabolic process	13	BP	turquoise
GO:0009864	0.000987	induced systemic resistance, jasmonic acid mediated signaling pathway	17	BP	turquoise
GO:0048582	0.000987	positive regulation of post-embryonic development	58	BP	turquoise
GO:0031425	0.000988	chloroplast RNA processing	18	BP	turquoise
GO:0044092	0.001006	negative regulation of molecular function	77	BP	turquoise
GO:0009299	0.001075	mRNA transcription	14	BP	turquoise
GO:1905622	0.001358	negative regulation of leaf development	17	BP	turquoise
GO:0051240	0.001558	positive regulation of multicellular organismal process	88	BP	turquoise
GO:0000395	0.001749	mRNA 5'-splice site recognition	12	BP	turquoise
GO:2000243	0.001749	positive regulation of reproductive process	47	BP	turquoise
GO:0005681	0.001758	spliceosomal complex	57	CC	turquoise
GO:0010200	0.001902	response to chitin	82	BP	turquoise
GO:0045088	0.001902	regulation of innate immune response	71	BP	turquoise
GO:0001085	0.002115	RNA polymerase II transcription factor binding	30	MF	turquoise
GO:1900055	0.002149	regulation of leaf senescence	31	BP	turquoise
GO:0031400	0.002176	negative regulation of protein modification process	43	BP	turquoise
GO:0035670	0.002176	plant-type ovary development	35	BP	turquoise
GO:0000375	0.002235	RNA splicing, via transesterification reactions	75	BP	turquoise
GO:0000987	0.002309	cis-regulatory region sequence-specific DNA binding	21	MF	turquoise
GO:1901654	0.002309	response to ketone	21	BP	turquoise
GO:0010022	0.00231	meristem determinacy	16	BP	turquoise
GO:0044390	0.00231	ubiquitin-like protein conjugating enzyme binding	23	MF	turquoise
GO:0000377	0.002504	RNA splicing, via transesterification reactions with bulged adenosine as nucleophile	74	BP	turquoise
GO:0009610	0.002688	response to symbiotic fungus	19	BP	turquoise
GO:0045089	0.002851	positive regulation of innate immune response	50	BP	turquoise
GO:0000782	0.003077	telomere cap complex	11	CC	turquoise
GO:0000783	0.003077	nuclear telomere cap complex	11	CC	turquoise
GO:0051093	0.003573	negative regulation of developmental process	88	BP	turquoise
GO:0005684	0.003702	U2-type spliceosomal complex	28	CC	turquoise
GO:0031627	0.003702	telomeric loop formation	12	BP	turquoise
GO:0042562	0.003735	hormone binding	29	MF	turquoise
GO:0016661	0.004086	oxidoreductase activity, acting on other nitrogenous compounds as donors	7	MF	turquoise
GO:0006809	0.004229	nitric oxide biosynthetic process	9	BP	turquoise
GO:0046209	0.004229	nitric oxide metabolic process	9	BP	turquoise
GO:0000977	0.004599	RNA polymerase II transcription regulatory region sequence-specific DNA binding	37	MF	turquoise
GO:0019901	0.005045	protein kinase binding	49	MF	turquoise
GO:0009682	0.00505	induced systemic resistance	23	BP	turquoise
GO:0051241	0.00505	negative regulation of multicellular organismal process	81	BP	turquoise
GO:0042136	0.005583	neurotransmitter biosynthetic process	15	BP	turquoise
GO:0043086	0.006179	negative regulation of catalytic activity	62	BP	turquoise
GO:0001666	0.006518	response to hypoxia	50	BP	turquoise
GO:0048638	0.006559	regulation of developmental growth	70	BP	turquoise
GO:0071359	0.006559	cellular response to dsRNA	33	BP	turquoise
GO:0010014	0.006832	meristem Initiation	29	BP	turquoise
GO:0071941	0.006832	nitrogen cycle metabolic process	11	BP	turquoise
GO:0010201	0.006917	response to continuous far red light stimulus by the high-irradiance response system	9	BP	turquoise
GO:0010089	0.006983	xylem development	35	BP	turquoise
GO:1900056	0.00715	negative regulation of leaf senescence	15	BP	turquoise
GO:0010582	0.007425	floral meristem determinacy	14	BP	turquoise
GO:0010039	0.007561	response to iron ion	42	BP	turquoise
GO:0042126	0.00771	nitrate metabolic process	8	BP	turquoise
GO:0042128	0.00771	nitrate assimilation	8	BP	turquoise
GO:0009608	0.007895	response to symbiont	19	BP	turquoise
GO:0016688	0.007895	L-ascorbate peroxidase activity	7	MF	turquoise
GO:0051090	0.007904	regulation of DNA-binding transcription factor activity	22	BP	turquoise
GO:0010075	0.008824	regulation of meristem growth	28	BP	turquoise
GO:1901000	0.008824	regulation of response to salt stress	28	BP	turquoise
GO:0003714	0.00891	transcription corepressor activity	21	MF	turquoise
GO:0006368	0.00891	transcription Elongation from RNA polymerase II promoter	15	BP	turquoise
GO:0010044	0.00891	response to aluminum ion	15	BP	turquoise
GO:0031050	0.009263	dsRNA processing	32	BP	turquoise
GO:0070918	0.009263	production of small RNA involved in gene silencing by RNA	32	BP	turquoise
GO:0000785	0.009508	chromatin	86	CC	turquoise
GO:1901001	0.009545	negative regulation of response to salt stress	13	BP	turquoise
GO:0043331	0.010212	response to dsRNA	33	BP	turquoise
GO:0051512	0.010212	positive regulation of unidimensional cell growth	9	BP	turquoise
GO:0002757	0.010258	immune response-activating signal transduction	16	BP	turquoise
GO:0005983	0.010461	starch catabolic process	21	BP	turquoise
GO:0036293	0.010698	response to decreased oxygen levels	54	BP	turquoise
GO:0010563	0.010736	negative regulation of phosphorus metabolic process	30	BP	turquoise
GO:0045936	0.010736	negative regulation of phosphate metabolic process	30	BP	turquoise
GO:0048506	0.010736	regulation of timing of meristematic phase transition	34	BP	turquoise
GO:0048510	0.010736	regulation of timing of transition from vegetative to reproductive phase	34	BP	turquoise
GO:0009816	0.010752	defense response to bacterium, incompatible interaction	29	BP	turquoise
GO:0004721	0.010755	phosphoprotein phosphatase activity	47	MF	turquoise
GO:1901699	0.010755	cellular response to nitrogen compound	60	BP	turquoise
GO:0009251	0.010859	glucan catabolic process	27	BP	turquoise
GO:0009736	0.011363	cytokinin-activated signaling pathway	35	BP	turquoise
GO:0016132	0.011363	brassinosteroid biosynthetic process	14	BP	turquoise
GO:0048481	0.011451	plant ovule development	31	BP	turquoise
GO:0016607	0.011452	nuclear speck	56	CC	turquoise
GO:2000036	0.011452	regulation of stem cell population maintenance	8	BP	turquoise
GO:0045292	0.011716	mRNA cis splicing, via spliceosome	13	BP	turquoise
GO:0070482	0.011833	response to oxygen levels	54	BP	turquoise
GO:0002764	0.011835	immune response-regulating signaling pathway	16	BP	turquoise
GO:0003691	0.011835	double-stranded telomeric DNA binding	12	MF	turquoise
GO:0000023	0.01243	maltose metabolic process	7	BP	turquoise
GO:0003712	0.01243	transcription coregulator activity	50	MF	turquoise
GO:0004861	0.01243	cyclin-dependent protein serine/threonine kinase inhibitor activity	7	MF	turquoise
GO:0009961	0.01243	response to 1-aminocyclopropane-1-carboxylic acid	7	BP	turquoise
GO:0030291	0.01243	protein serine/threonine kinase inhibitor activity	7	MF	turquoise
GO:0045736	0.01243	negative regulation of cyclin-dependent protein serine/threonine kinase activity	7	BP	turquoise
GO:1904030	0.01243	negative regulation of cyclin-dependent protein kinase activity	7	BP	turquoise
GO:0019220	0.012832	regulation of phosphate metabolic process	88	BP	turquoise
GO:0051174	0.012832	regulation of phosphorus metabolic process	88	BP	turquoise
GO:0002252	0.013186	immune effector process	47	BP	turquoise
GO:0010218	0.013623	response to far red light	37	BP	turquoise
GO:1903311	0.013623	regulation of mRNA metabolic process	48	BP	turquoise
GO:0040034	0.013695	regulation of development, heterochronic	39	BP	turquoise
GO:0048572	0.014896	short-day photoperiodism	10	BP	turquoise
GO:0048575	0.014896	short-day photoperiodism, flowering	10	BP	turquoise
GO:0071368	0.014896	cellular response to cytokinin stimulus	35	BP	turquoise
GO:2000068	0.014896	regulation of defense response to insect	10	BP	turquoise
GO:0044247	0.015199	cellular polysaccharide catabolic process	27	BP	turquoise
GO:0012501	0.015373	programmed cell death	54	BP	turquoise
GO:0016538	0.015373	cyclin-dependent protein serine/threonine kinase regulator activity	15	MF	turquoise
GO:0071901	0.015373	negative regulation of protein serine/threonine kinase activity	15	BP	turquoise
GO:0006470	0.015563	protein dephosphorylation	51	BP	turquoise
GO:0008380	0.015563	RNA splicing	90	BP	turquoise
GO:0016859	0.016194	cis-trans isomerase activity	29	MF	turquoise
GO:0019840	0.017118	isoprenoid binding	16	MF	turquoise
GO:0048440	0.017374	carpel development	38	BP	turquoise
GO:0016246	0.017961	RNA interference	24	BP	turquoise
GO:0030422	0.017961	production of siRNA involved in RNA interference	24	BP	turquoise
GO:0006469	0.018295	negative regulation of protein kinase activity	17	BP	turquoise
GO:0033673	0.018295	negative regulation of kinase activity	17	BP	turquoise
GO:0000304	0.019302	response to singlet oxygen	9	BP	turquoise
GO:0000373	0.019302	Group II intron splicing	12	BP	turquoise
GO:0010268	0.019302	brassinosteroid homeostasis	18	BP	turquoise
GO:0009706	0.019622	chloroplast inner membrane	33	CC	turquoise
GO:0048467	0.019622	gynoecium development	44	BP	turquoise
GO:0097237	0.019622	cellular response to toxic substance	47	BP	turquoise
GO:0010114	0.019724	response to red light	37	BP	turquoise
GO:0080168	0.019724	abscisic acid transport	7	BP	turquoise
GO:1902456	0.01973	regulation of stomatal opening	10	BP	turquoise
GO:0010565	0.020283	regulation of cellular ketone metabolic process	40	BP	turquoise
GO:0005685	0.020477	U1 snRNP	14	CC	turquoise
GO:0048532	0.021032	anatomical structure arrangement	41	BP	turquoise
GO:0000156	0.021298	phosphorelay response regulator activity	17	MF	turquoise
GO:0000413	0.021298	protein peptidyl-prolyl isomerization	27	BP	turquoise
GO:0003755	0.021298	peptidyl-prolyl cis-trans isomerase activity	27	MF	turquoise
GO:0008301	0.021549	DNA binding, bending	6	MF	turquoise
GO:0034599	0.021549	cellular response to oxidative stress	49	BP	turquoise
GO:0071071	0.021549	regulation of phospholipid biosynthetic process	6	BP	turquoise
GO:0071452	0.021549	cellular response to singlet oxygen	6	BP	turquoise
GO:0010073	0.021588	meristem maintenance	68	BP	turquoise
GO:0000079	0.021679	regulation of cyclin-dependent protein serine/threonine kinase activity	18	BP	turquoise
GO:0010476	0.021679	gibberellin mediated signaling pathway	29	BP	turquoise
GO:0019207	0.021679	kinase regulator activity	25	MF	turquoise
GO:1904029	0.021679	regulation of cyclin-dependent protein kinase activity	18	BP	turquoise
GO:0035327	0.0217	transcriptionally active chromatin	15	CC	turquoise
GO:2000022	0.022323	regulation of jasmonic acid mediated signaling pathway	23	BP	turquoise
GO:0051348	0.022363	negative regulation of transferase activity	20	BP	turquoise
GO:0042133	0.023221	neurotransmitter metabolic process	16	BP	turquoise
GO:0048574	0.023221	long-day photoperiodism, flowering	12	BP	turquoise
GO:0071489	0.023221	cellular response to red or far red light	30	BP	turquoise
GO:0032101	0.024623	regulation of response to external stimulus	55	BP	turquoise
GO:0048530	0.025305	fruit morphogenesis	9	BP	turquoise
GO:0047484	0.026257	regulation of response to osmotic stress	30	BP	turquoise
GO:0010112	0.02716	regulation of systemic acquired resistance	13	BP	turquoise
GO:0016570	0.02716	histone modification	88	BP	turquoise
GO:0010017	0.0273	red or far-red light signaling pathway	29	BP	turquoise
GO:0010119	0.02907	regulation of stomatal movement	49	BP	turquoise
GO:0004860	0.0292	protein kinase inhibitor activity	7	MF	turquoise
GO:0006308	0.0292	DNA catabolic process	7	BP	turquoise
GO:0008219	0.0292	cell death	65	BP	turquoise
GO:0009968	0.0292	negative regulation of signal transduction	85	BP	turquoise
GO:0019210	0.0292	kinase inhibitor activity	7	MF	turquoise
GO:2000693	0.0292	positive regulation of seed maturation	7	BP	turquoise
GO:0006354	0.032346	DNA-templated transcription, Elongation	15	BP	turquoise
GO:0019887	0.032793	protein kinase regulator activity	24	MF	turquoise
GO:0033119	0.033683	negative regulation of RNA splicing	13	BP	turquoise
GO:0048025	0.033683	negative regulation of mRNA splicing, via spliceosome	13	BP	turquoise
GO:0010082	0.033712	regulation of root meristem growth	16	BP	turquoise
GO:0051346	0.034413	negative regulation of hydrolase activity	31	BP	turquoise
GO:0010223	0.03452	secondary shoot formation	17	BP	turquoise
GO:0010346	0.03452	shoot axis formation	17	BP	turquoise
GO:1903312	0.034563	negative regulation of mRNA metabolic process	21	BP	turquoise
GO:0000398	0.034892	mRNA splicing, via spliceosome	62	BP	turquoise
GO:0004645	0.034892	1,4-alpha-oligoglucan phosphorylase activity	6	MF	turquoise
GO:0004722	0.034892	protein serine/threonine phosphatase activity	28	MF	turquoise
GO:0010447	0.034892	response to acidic pH	6	BP	turquoise
GO:0032988	0.034892	ribonucleoprotein complex disassembly	6	BP	turquoise
GO:1900367	0.034892	positive regulation of defense response to insect	6	BP	turquoise
GO:0050684	0.03511	regulation of mRNA processing	32	BP	turquoise
GO:0016129	0.035237	phytosteroid biosynthetic process	14	BP	turquoise
GO:0071010	0.035237	prespliceosome	14	CC	turquoise
GO:0016569	0.035642	covalent chromatin modification	88	BP	turquoise
GO:0071370	0.03661	cellular response to gibberellin stimulus	29	BP	turquoise
GO:0017148	0.036687	negative regulation of translation	31	BP	turquoise
GO:0071345	0.037042	cellular response to cytokine stimulus	15	BP	turquoise
GO:1902882	0.037042	regulation of response to oxidative stress	15	BP	turquoise
GO:0009583	0.038582	detection of light stimulus	16	BP	turquoise
GO:0008023	0.039613	transcription Elongation factor complex	18	CC	turquoise
GO:0009937	0.039613	regulation of gibberellic acid mediated signaling pathway	19	BP	turquoise
GO:0009528	0.040066	plastid inner membrane	33	CC	turquoise
GO:0051338	0.040437	regulation of transferase activity	67	BP	turquoise
GO:0016209	0.041314	antioxidant activity	40	MF	turquoise
GO:0015740	0.041581	C4-dicarboxylate transport	14	BP	turquoise
GO:0046864	0.041581	isoprenoid transport	7	BP	turquoise
GO:0046865	0.041581	terpenoid transport	7	BP	turquoise
GO:0048534	0.041581	hematopoietic or lymphoid organ development	10	BP	turquoise
GO:0071004	0.041581	U2-type prespliceosome	10	CC	turquoise
GO:0071218	0.041581	cellular response to misfolded protein	14	BP	turquoise
GO:0000123	0.042791	histone acetyltransferase complex	20	CC	turquoise
GO:0000188	0.042791	inactivation of MAPK activity	8	BP	turquoise
GO:0010647	0.042791	positive regulation of cell communication	76	BP	turquoise
GO:0015995	0.042791	chlorophyll biosynthetic process	15	BP	turquoise
GO:0030097	0.042791	hemopoiesis	9	BP	turquoise
GO:0032104	0.042791	regulation of response to extracellular stimulus	8	BP	turquoise
GO:0032107	0.042791	regulation of response to nutrient levels	8	BP	turquoise
GO:0033549	0.042791	MAP kinase phosphatase activity	8	MF	turquoise
GO:0036473	0.042791	cell death in response to oxidative stress	9	BP	turquoise
GO:0043407	0.042791	negative regulation of MAP kinase activity	8	BP	turquoise
GO:0045859	0.042791	regulation of protein kinase activity	57	BP	turquoise
GO:0097468	0.042791	programmed cell death in response to reactive oxygen species	9	BP	turquoise
GO:0004725	0.046232	protein tyrosine phosphatase activity	13	MF	turquoise
GO:0035335	0.046232	peptidyl-tyrosine dephosphorylation	13	BP	turquoise
GO:0050686	0.046232	negative regulation of mRNA processing	13	BP	turquoise
GO:0044764	0.047413	multi-organism cellular process	27	BP	turquoise
GO:0001505	0.047735	regulation of neurotransmitter levels	21	BP	turquoise
GO:0019900	0.047785	kinase binding	52	MF	turquoise
GO:0031969	0.047785	chloroplast membrane	58	CC	turquoise
GO:1900057	0.048137	positive regulation of leaf senescence	14	BP	turquoise
GO:1905623	0.048137	positive regulation of leaf development	14	BP	turquoise
GO:0071900	0.048526	regulation of protein serine/threonine kinase activity	35	BP	turquoise
GO:0009559	0.04934	embryo sac central cell differentiation	19	BP	turquoise
GO:0010380	0.04934	regulation of chlorophyll biosynthetic process	19	BP	turquoise
GO:0000018	0.017493	regulation of DNA recombination	16	BP	brown
GO:0000049	0.020646	tRNA binding	10	MF	brown
GO:0000070	7.37e-06	mitotic sister chromatid segregation	29	BP	brown
GO:0000082	0.000294	G1/S transition of mitotic cell cycle	19	BP	brown
GO:0000178	0.036956	exosome (RNase complex)	10	CC	brown
GO:0000226	0.001074	microtubule cytoskeleton organization	64	BP	brown
GO:0000228	6.43e-05	nuclear chromosome	81	CC	brown
GO:0000280	1.34e-16	nuclear division	103	BP	brown
GO:0000281	0.001909	mitotic cytokinesis	52	BP	brown
GO:0000347	4.44e-06	THO complex	16	CC	brown
GO:0000428	0.025579	DNA-directed RNA polymerase complex	47	CC	brown
GO:0000724	0.015787	double-strand break repair via homologous recombination	28	BP	brown
GO:0000725	0.018884	recombinational repair	28	BP	brown
GO:0000727	0.020646	double-strand break repair via break-induced replication	6	BP	brown
GO:0000775	1.48e-07	chromosome, centromeric region	41	CC	brown
GO:0000776	0.002602	kinetochore	24	CC	brown
GO:0000777	0.002118	condensed chromosome kinetochore	11	CC	brown
GO:0000778	0.009897	condensed nuclear chromosome kinetochore	9	CC	brown
GO:0000779	0.00021	condensed chromosome, centromeric region	16	CC	brown
GO:0000780	0.003864	condensed nuclear chromosome, centromeric region	11	CC	brown
GO:0000785	6.9e-08	chromatin	89	CC	brown
GO:0000786	1.59e-15	nucleosome	26	CC	brown
GO:0000790	0.020646	nuclear chromatin	39	CC	brown
GO:0000793	0.001536	condensed chromosome	29	CC	brown
GO:0000794	0.026992	condensed nuclear chromosome	20	CC	brown
GO:0000819	3.31e-08	sister chromatid segregation	41	BP	brown
GO:0000822	0.001698	inositol hexakisphosphate binding	10	MF	brown
GO:0000910	0.00059	cytokinesis	57	BP	brown
GO:0000911	0.003171	cytokinesis by cell plate formation	31	BP	brown
GO:0000912	0.000574	assembly of actomyosin apparatus involved in cytokinesis	7	BP	brown
GO:0000914	0.000574	phragmoplast assembly	7	BP	brown
GO:0000923	0.020646	equatorial microtubule organizing center	6	CC	brown
GO:0000930	0.040513	gamma-tubulin complex	6	CC	brown
GO:0000972	0.04293	transcription-dependent tethering of RNA polymerase II gene DNA at nuclear periphery	7	BP	brown
GO:0001510	0.016846	RNA methylation	23	BP	brown
GO:0001708	0.039827	cell fate specification	13	BP	brown
GO:0002478	0.002443	antigen processing and presentation of exogenous peptide antigen	14	BP	brown
GO:0002495	0.008438	antigen processing and presentation of peptide antigen via MHC class II	14	BP	brown
GO:0002504	0.008438	antigen processing and presentation of peptide or polysaccharide antigen via MHC class II	14	BP	brown
GO:0003682	0.0006	chromatin binding	63	MF	brown
GO:0003697	0.002994	single-stranded DNA binding	32	MF	brown
GO:0003774	3.11e-09	motor activity	60	MF	brown
GO:0003777	6.03e-12	microtubule motor activity	56	MF	brown
GO:0003899	2.95e-05	DNA-directed 5'-3' RNA polymerase activity	22	MF	brown
GO:0004066	0.044787	asparagine synthase (glutamine-hydrolyzing) activity	5	MF	brown
GO:0004252	0.017493	serine-type endopeptidase activity	16	MF	brown
GO:0004430	0.03091	1-phosphatidylinositol 4-kinase activity	5	MF	brown
GO:0004478	0.040513	methionine adenosyltransferase activity	6	MF	brown
GO:0004650	0.000744	polygalacturonase activity	10	MF	brown
GO:0005635	1.98e-05	nuclear envelope	62	CC	brown
GO:0005643	0.00021	nuclear pore	26	CC	brown
GO:0005657	0.000131	replication fork	25	CC	brown
GO:0005662	0.03091	DNA replication factor A complex	5	CC	brown
GO:0005675	0.009071	transcription factor TFIIH holo complex	7	CC	brown
GO:0005677	0.003111	chromatin silencing complex	12	CC	brown
GO:0005819	1.47e-06	spindle	54	CC	brown
GO:0005828	0.040368	kinetochore microtubule	9	CC	brown
GO:0005871	6.03e-12	kinesin complex	56	CC	brown
GO:0005874	2.83e-05	microtubule	57	CC	brown
GO:0005875	1.82e-12	microtubule associated complex	70	CC	brown
GO:0005876	0.008438	spindle microtubule	18	CC	brown
GO:0005881	0.026992	cytoplasmic microtubule	20	CC	brown
GO:0006260	1.69e-14	DNA replication	80	BP	brown
GO:0006261	1.41e-14	DNA-dependent DNA replication	70	BP	brown
GO:0006268	6.35e-12	DNA unwinding involved in DNA replication	17	BP	brown
GO:0006269	0.002602	DNA replication, synthesis of RNA primer	8	BP	brown
GO:0006270	0.000323	DNA replication Initiation	13	BP	brown
GO:0006275	9.53e-07	regulation of DNA replication	34	BP	brown
[truncated: 301 more rows]

## Sheet: Supplementary Table5
Supplementary Table 5. The association analysis between the five fiber traits and the expression in 15 dpa fiber of 77 hub genes identified by cGENIE3.
Gene ID	Target gene number	TF family	Arabidopsis gene	gene name	Orthologue gene function	correlation (FL)	pvalue (FL)	correlation to FU	pvalue (FU)	correlation to FS	pvalue (FS)	correlation to FE	pvalue (FE)	correlation to MV	pvalue (MV)	reference
Gohir.D10G037100	2755	G2-like	AT2G38300	GhMYS1_D10	involved in wax biosynthesis	0.2385	0.0001	0.1516	0.0162	0.1898	0.0025	NA	NA	NA	NA
Gohir.A10G036400	2602	G2-like	AT2G38300	GhMYS1_A10	involved in wax biosynthesis	0.1369	0.0302	NA	NA	NA	NA	-0.1702	0.0069	NA	NA
Gohir.D13G165700	2194	MYB	AT1G08810	GhMYB60_D13	no	0.2873	0	NA	NA	0.1718	0.0064	NA	NA	NA	NA
Gohir.A01G153200	1664	MYB	AT4G38620	GhMYB4_A01	regulation of phenylpropanoid metabolic process,	0.2131	0.0007	0.137	0.0301	NA	NA	0.1266	0.0451	NA	NA
Gohir.A13G160500	1652	MYB	AT1G08810	GhMYB60_A13	no	0.2165	0.0006	NA	NA	NA	NA	NA	NA	NA	NA
Gohir.D04G185300	1562	MADS	AT1G24260	GhSPE3_D04	no	0.2184	0.0005	NA	NA	NA	NA	NA	NA	NA	NA
Gohir.D05G301150	1484	Dof	AT2G37590	GhDOF2.4_D05	PEAR protein involved in the formation of a short-range concentration gradient that peaks at protophloem sieve elements, and activates gene expression that promotes radial growth. Locally promotes transcription of inhibitory HD-ZIP III genes, and thereby establishes a negative-feedback loop that forms a robust boundary that demarks the zone of cell division.	NA	NA	NA	NA	NA	NA	0.156	0.0134	NA	NA
Gohir.A04G140801	1397	MADS	AT1G24260	GhSPE3_A04	no	0.1792	0.0044	NA	NA	NA	NA	NA	NA	NA	NA
Gohir.A07G205266	1391	MYB	AT3G28910	GhMYB30_A07	Involved in very long-chain fatty acid biosynthetic process	0.138	0.0288	NA	NA	NA	NA	NA	NA	NA	NA
Gohir.A11G328900	1150	MYB	AT2G38090	GhDIV1_A11	no	NA	NA	NA	NA	NA	NA	NA	NA	NA	NA
Gohir.D05G161100	1105	NAC	AT4G28500	GhSND2_D05	regulation of secondary cell wall biogenesis	-0.2754	0	-0.1546	0.0142	NA	NA	NA	NA	NA	NA
Gohir.A12G037700	1091	MYB	AT2G16720	GhMYB7_A12	no	-0.3769	0	-0.2247	0.0003	NA	NA	NA	NA	NA	NA	Wang et al.(2017)
Gohir.D07G211500	1070	MYB	AT3G28910	GhMYB30_D07	very long-chain fatty acid biosynthetic process	0.1803	0.0042	NA	NA	NA	NA	NA	NA	NA	NA
Gohir.D07G019600	995	trihelix	AT1G76890	GhGT2_D07	no	NA	NA	NA	NA	NA	NA	NA	NA	NA	NA
Gohir.D07G136400	976	MYB	AT1G09540	GhMYB61_D07	affect terpene metabolism and trichome development	-0.3984	0	-0.2183	0.0005	-0.1376	0.0294	NA	NA	0.13	0.039542
Gohir.A12G177400	957	MYB	AT3G47600	GhMYB94_A12	MYB94 positive regulation of wax biosynthetic process, response to auxin	NA	NA	NA	NA	NA	NA	NA	NA	NA	NA
Gohir.A05G374700	942	ZF-HD	AT2G02540	GhHB21_A05	Expressed in vascular tissue	NA	NA	NA	NA	NA	NA	NA	NA	NA	NA
Gohir.D09G245700	935	C2H2	AT3G48430	GhJMJ12_D09	REF6 may play a role in brassinoteroid signaling by affecting histone methylation in the promoters of BR-responsive genes.	NA	NA	-0.172	0.0063	NA	NA	NA	NA	NA	NA	Liu et al.(2020)
Gohir.A05G301500	928	Dof	AT3G55370	GhOBP3_A05	nature	NA	NA	NA	NA	NA	NA	NA	NA	NA	NA
Gohir.A06G031200	916	GATA	AT3G21175	GhZML1_A06	nature	NA	NA	NA	NA	NA	NA	NA	NA	NA	NA
Gohir.A12G116300	903	NAC	GhFSN1(NAC)	GhNST1_A12	plant-type secondary cell wall biogenesis	NA	NA	NA	NA	NA	NA	NA	NA	NA	NA	Zhang et al. (2018)
Gohir.A12G139400	896	NAC	AT4G28500	GhSND2_A12	regulation of secondary cell wall biogenesis	NA	NA	NA	NA	NA	NA	NA	NA	NA	NA
Gohir.A05G158500	893	NAC	AT4G28500	GhSND2_A05	regulation of secondary cell wall biogenesis	NA	NA	NA	NA	NA	NA	NA	NA	NA	NA
Gohir.A07G132100	857	MYB	AT1G09540	GhMYB61_A07	affect terpene metabolism and trichome development	-0.4017	0	-0.1621	0.0101	-0.1788	0.0045	NA	NA	NA	NA
Gohir.A04G031300	850	NAC	AT3G15510	GhNAC2_A04	no	NA	NA	-0.1253	0.0474	NA	NA	NA	NA	NA	NA
Gohir.A09G040400	839	HD-ZIP	AT4G00730	GhANL2_A09	plant-type cell wall modification	NA	NA	NA	NA	NA	NA	NA	NA	NA	NA
Gohir.D10G243400	827	MYB	AT3G11280	no name	response to gibberellin	NA	NA	NA	NA	NA	NA	NA	NA	NA	NA
Gohir.D05G359900	818	NAC	AT3G15510	NAC2	no	-0.1269	0.0447	NA	NA	NA	NA	NA	NA	NA	NA
Gohir.A01G020800	789	Trihelix	AT2G33550	ASR3	no	NA	NA	NA	NA	NA	NA	NA	NA	NA	NA
Gohir.D01G019300	779	Trihelix	AT2G33550	ASR3	no	-0.1374	0.0295	-0.1276	0.0434	NA	NA	NA	NA	NA	NA
Gohir.D08G112600	757	HD-ZIP	AT4G00730	ANL2	plant-type cell wall modification	-0.1424	0.024	NA	NA	NA	NA	NA	NA	NA	NA
Gohir.A09G244800	747	C2H2	AT3G48430	GhJMJ12_A09	REF6 may play a role in brassinoteroid signaling by affecting histone methylation in the promoters of BR-responsive genes.	-0.125	0.0479	-0.2172	0.0005	NA	NA	NA	NA	NA	NA	Liu et al.(2020)
Gohir.A06G133404	736	NAC	AT4G28500	SND2	regulation of secondary cell wall biogenesis	-0.2683	0	-0.1484	0.0186	NA	NA	NA	NA	NA	NA
Gohir.D04G049200	712	MYB	AT3G28910	MYB30	It is a a positive regulator of brassinosteroid and abscisic acid signaling	-0.2935	0	-0.1563	0.0132	-0.1443	0.0222	NA	NA	NA	NA
Gohir.D05G198700	712	C2H2	AT5G66730	IDD1	regulation of gibberellic acid mediated signaling pathway	-0.1538	0.0147	NA	NA	NA	NA	NA	NA	NA	NA
Gohir.D03G089200	708	Trihelix	AT1G33240	GTL1	trichome morphogenesis	NA	NA	NA	NA	NA	NA	NA	NA	NA	NA
Gohir.A05G262400	692	MYB	AT4G37260	MYB73		NA	NA	NA	NA	NA	NA	NA	NA	NA	NA
Gohir.A05G365800	671	MYB	AT3G28910	MYB30		-0.3224	0	-0.1334	0.0347	-0.2091	0.0009	NA	NA	NA	NA
Gohir.D12G179800	611	MYB	AT3G47600	GhMYB94	MYB94 positive regulation of wax biosynthetic process, response to auxin	-0.2096	0.0008	NA	NA	-0.1776	0.0048	NA	NA	NA	NA
Gohir.D12G119800	607	NAC	GhFSN1(NAC)AT2G46770	NST1	plant-type secondary cell wall biogenesis	NA	NA	NA	NA	NA	NA	NA	NA	NA	NA
Gohir.D09G015200	600	MYB	AT3G28910	MYB30		0.1623	0.01	NA	NA	NA	NA	NA	NA	NA	NA
Gohir.D05G244700	599	Trihelix	AT1G76880	DF1		-0.2907	0	-0.1876	0.0028	-0.1575	0.0125	NA	NA	NA	NA
Gohir.A07G054000	593	C2H2	AT3G48430	GhJMJ12	REF6 may play a role in brassinoteroid signaling by affecting histone methylation in the promoters of BR-responsive genes.	NA	NA	NA	NA	NA	NA	NA	NA	NA	NA
Gohir.A02G094200	587	Trihelix	AT1G33240	GTL1	trichome morphogenesis	NA	NA	NA	NA	NA	NA	NA	NA	NA	NA
Gohir.A03G113400	587	C2H2	AT2G01940	SGR5	regulates auxin biosynthesis and transport	0.1536	0.0149	NA	NA	NA	NA	NA	NA	NA	NA
Gohir.D07G058400	581	C2H2	AT3G48430	REF6	regulation of ethylene-activated signaling pathway,	NA	NA	NA	NA	NA	NA	NA	NA	NA	NA
Gohir.D12G242500	581	NAC	AT1G32770	SND1	regulation of secondary cell wall biogenesis	-0.3668	0	-0.2043	0.0011	-0.1759	0.0052	NA	NA	NA	NA
Gohir.D13G220200	573	MYB	AT5G12870	GhMYB46_D13		-0.4017	0	-0.2626	0	-0.1675	0.0078	NA	NA	NA	NA	Huang et al. (2019)
Gohir.D05G201700	561	B3	AT4G33280	no name	unknow	NA	NA	NA	NA	NA	NA	NA	NA	NA	NA
Gohir.A09G014900	557	Dof	AT3G47500	CDF3	regulation of timing of transition from vegetative to reproductive phase	0.2077	0.0009	NA	NA	NA	NA	NA	NA	NA	NA
Gohir.A05G199100	548	Dof	AT3G50410	OBP1	cell wall modification	-0.2968	0	NA	NA	-0.1607	0.0108	NA	NA	NA	NA
Gohir.A12G062200	548	bZIP	AT1G75390	bZIP44		NA	NA	NA	NA	NA	NA	-0.1536	0.0149	NA	NA
Gohir.A05G403400	534	bZIP	AT2G40620	bZIP18	tissue development	NA	NA	NA	NA	NA	NA	NA	NA	NA	NA
Gohir.D06G019045	522	WRKY	AT4G24240	WRKY16	WRKY7	NA	NA	NA	NA	NA	NA	NA	NA	NA	NA
Gohir.D11G034000	517	TCP	AT3G47620	ATTCP14	AtTCP14 is predominantly expressed in the vascular tissue of the embryo, and affects gene expression in radicles in a non-cell-autonomous manner. Modulates GA-dependent stamen filament Elongation by direct activation of SAUR63 subfamily genes through conserved target sites in their promoters.	0.323	0	NA	NA	NA	NA	NA	NA	NA	NA
Gohir.D12G272900	516	HD-ZIP	AT1G73360	GhHOX3		NA	NA	NA	NA	NA	NA	NA	NA	NA	NA	Shan et al. (2014)
Gohir.A02G105200	506	WRKY	AT4G23550	WRKY29		NA	NA	NA	NA	-0.1912	0.0024	NA	NA	NA	NA
Gohir.A08G094800	496	HD-ZIP	AT4G00730	ANL2	plant-type cell wall modification,	-0.1342	0.0336	-0.1866	0.003	NA	NA	NA	NA	NA	NA
Gohir.D06G135700	495	NAC	AT4G28500	SND2	regulation of secondary cell wall biogenesis	-0.2486	0.0001	-0.1647	0.0089	-0.1482	0.0188	NA	NA	NA	NA
Gohir.A10G070500	485	NAC	AT5G13180	VNI2	xylem development	0.2434	0.0001	NA	NA	0.142	0.0245	NA	NA	NA	NA
Gohir.A01G115300	483	ZF-HD	AT2G18350	HB24		0.138	0.0288	NA	NA	0.1542	0.0145	NA	NA	NA	NA
Gohir.D05G103700	482	GATA	AT1G08000	GATA10	cell differentiation	NA	NA	NA	NA	NA	NA	-0.1356	0.0318	NA	NA
Gohir.D08G174900	478	G2-like	AT1G32240	KAN2		NA	NA	NA	NA	0.1242	0.0493	NA	NA	NA	NA
Gohir.D11G347900	469	MYB_related	AT5G58900	DIV1		-0.3533	0	-0.2376	0.0001	-0.2068	0.001	NA	NA	NA	NA
Gohir.A05G027000	464	NAC	AT4G29230	SND4	regulation of secondary cell wall biogenesis	NA	NA	NA	NA	NA	NA	NA	NA	NA	NA
Gohir.D12G168800	459	TCP	AT1G69690	GbTCP	intracellular auxin homeostasis	-0.1423	0.0242	NA	NA	NA	NA	NA	NA	NA	NA
Gohir.A13G144700	458	NAC	AT3G15510	NAC2		NA	NA	NA	NA	NA	NA	NA	NA	NA	NA
Gohir.A05G195500	456	C2H2	AT3G50700	IDD2	regulation of gibberellic acid mediated signaling pathway	-0.2667	0	-0.1352	0.0323	NA	NA	NA	NA	NA	NA
Gohir.A05G243100	456	Trihelix	AT1G76880	DF1		-0.1999	0.0015	NA	NA	NA	NA	NA	NA	NA	NA
Gohir.D07G149600	450	HD-ZIP	AT4G00730	ANL2	plant-type cell wall modification,	NA	NA	NA	NA	NA	NA	NA	NA	NA	NA
Gohir.D12G108200	445	HD-ZIP	AT4G00730	ANL2	plant-type cell wall modification,	NA	NA	-0.1688	0.0074	NA	NA	NA	NA	NA	NA
Gohir.D05G028900	443	NAC	AT4G29230	SND4	regulation of secondary cell wall biogenesis	NA	NA	NA	NA	NA	NA	NA	NA	NA	NA
Gohir.A12G165700	442	TCP	AT1G69690	TCP15	intracellular auxin homeostasis	NA	NA	NA	NA	NA	NA	-0.1512	0.0165	NA	NA
Gohir.A05G103900	438	GATA	AT1G08000	GATA10	cell differentiation,	0.2614	0	NA	NA	NA	NA	NA	NA	NA	NA
Gohir.A12G095200	434	C2H2	AT3G60580	ZAT9		NA	NA	NA	NA	NA	NA	NA	NA	-0.1303	0.039067
Gohir.A11G030701	427	TCP	AT3G47620	GhTCP14	response to cytokinin, response to gibberellin	0.2414	0.0001	NA	NA	NA	NA	NA	NA	NA	NA
Gohir.D12G143900	426	NAC	AT4G28500	SND2	regulation of secondary cell wall biogenesis	NA	NA	NA	NA	NA	NA	NA	NA	NA	NA

## Sheet: Supplementary Table 6
Supplementary Table 6. A comprehensive ranking of TFs based on target gene numbers among cGENIE3, cCorto, and cdynGENIE3.
TF id	Target genes in cGENIE3	Rank in cGENIE3	Target genes in cCorto	Rank in cCorto	Target genes in cdynGENIE3	Rank in cdynGENIE3	Comprehensive ranking
Gohir.D10G037100	2755	1	507	0.673307	974	0.583234	2.25654
Gohir.D04G185300	1562	0.566969	753	1	721	0.431737	1.99871
Gohir.A04G140801	1397	0.507078	517	0.686587	377	0.225749	1.41941
Gohir.A10G036400	2602	0.944465	256	0.339973	0	0	1.28444
Gohir.D05G244700	599	0.217423	28	0.0371846	1670	1	1.25461
Gohir.A13G160500	1652	0.599637	188	0.249668	609	0.364671	1.21398
Gohir.A12G037700	1091	0.396007	140	0.185923	1009	0.604192	1.18612
Gohir.A05G243200	209	0.0758621	21	0.0278884	1618	0.968862	1.07261
Gohir.D13G165700	2194	0.79637	179	0.237716	0	0	1.03409
Gohir.A12G177400	957	0.347368	405	0.537849	223	0.133533	1.01875
Gohir.A05G199100	548	0.198911	121	0.160691	1055	0.631737	0.991338
Gohir.A09G040400	839	0.304537	254	0.337317	578	0.346108	0.987962
Gohir.D03G089200	708	0.256987	214	0.284197	631	0.377844	0.919028
Gohir.D08G112600	757	0.274773	228	0.302789	560	0.335329	0.912891
Gohir.D10G027400	410	0.14882	43	0.0571049	1036	0.620359	0.826285
Gohir.D03G091100	78	0.0283122	18	0.0239044	1265	0.757485	0.809702
Gohir.A12G104200	397	0.144102	40	0.0531208	994	0.59521	0.792432
Gohir.A05G196300	433	0.157169	0	0	1033	0.618563	0.775732
Gohir.A09G244800	747	0.271143	115	0.152722	568	0.34012	0.763986
Gohir.D12G034700	353	0.128131	38	0.0504648	971	0.581437	0.760033
Gohir.A11G328900	1150	0.417423	255	0.338645	0	0	0.756068
Gohir.D12G272900	516	0.187296	149	0.197875	598	0.358084	0.743255
Gohir.D09G245700	935	0.339383	124	0.164675	374	0.223952	0.72801
Gohir.D05G301150	1484	0.538657	142	0.188579	0	0	0.727236
Gohir.A01G153200	1664	0.603993	89	0.118194	0	0	0.722187
Gohir.D09G041200	139	0.0504537	24	0.0318725	1061	0.635329	0.717656
Gohir.A05G195500	456	0.165517	52	0.0690571	794	0.475449	0.710023
Gohir.D05G201700	561	0.20363	152	0.201859	503	0.301198	0.706687
Gohir.A02G094200	587	0.213067	83	0.110226	635	0.38024	0.703532
Gohir.A05G243100	456	0.165517	90	0.119522	648	0.388024	0.673063
Gohir.D12G108200	445	0.161525	108	0.143426	582	0.348503	0.653454
Gohir.D12G121000	152	0.0551724	15	0.0199203	944	0.565269	0.640362
Gohir.A05G158500	893	0.324138	236	0.313413	0	0	0.637551
Gohir.A12G254000	231	0.0838476	33	0.0438247	847	0.507186	0.634858
Gohir.D07G019600	995	0.361162	206	0.273572	0	0	0.634734
Gohir.A11G101800	20	0.00725953	8	0.0106242	1013	0.606587	0.624471
Gohir.A10G033100	324	0.117604	103	0.136786	573	0.343114	0.597504
Gohir.D12G180500	70	0.0254083	45	0.059761	854	0.511377	0.596547
Gohir.A12G272100	262	0.0950998	60	0.0796813	701	0.41976	0.594542
Gohir.A03G124900	258	0.0936479	46	0.061089	734	0.439521	0.594258
Gohir.D10G033700	255	0.092559	200	0.265604	378	0.226347	0.584511
Gohir.A05G301500	928	0.336842	183	0.243028	0	0	0.57987
Gohir.A02G033800	311	0.112886	30	0.0398406	713	0.426946	0.579672
Gohir.A05G262400	692	0.25118	91	0.12085	345	0.206587	0.578616
Gohir.A06G031200	916	0.332486	185	0.245684	0	0	0.57817
Gohir.A07G205266	1391	0.5049	53	0.0703851	0	0	0.575285
Gohir.D11G347900	469	0.170236	118	0.156707	383	0.229341	0.556284
Gohir.D05G198700	712	0.258439	31	0.0411687	428	0.256287	0.555895
Gohir.D02G147300	273	0.0990926	53	0.0703851	641	0.383832	0.55331
Gohir.A08G132400	136	0.0493648	20	0.0265604	794	0.475449	0.551374
Gohir.A08G094800	496	0.180036	90	0.119522	399	0.238922	0.53848
Gohir.D13G211400	111	0.0402904	26	0.0345286	772	0.462275	0.537094
Gohir.A03G025100	80	0.0290381	17	0.0225764	808	0.483832	0.535447
Gohir.A07G131500	302	0.109619	31	0.0411687	642	0.384431	0.535219
Gohir.A05G369100	66	0.0239564	43	0.0571049	755	0.452096	0.533157
Gohir.A12G117400	176	0.0638838	14	0.0185923	746	0.446707	0.529183
Gohir.A03G091000	211	0.076588	33	0.0438247	679	0.406587	0.527
Gohir.A01G225700	229	0.0831216	73	0.0969456	575	0.344311	0.524379
Gohir.A12G272500	374	0.135753	50	0.0664011	522	0.312575	0.514729
Gohir.A10G235900	385	0.139746	25	0.0332005	570	0.341317	0.514264
Gohir.D12G179800	611	0.221779	80	0.106242	307	0.183832	0.511853
Gohir.D12G242500	581	0.210889	41	0.0544489	409	0.24491	0.510248
Gohir.A11G012600	99	0.0359347	25	0.0332005	736	0.440719	0.509854
Gohir.A03G099000	159	0.0577132	56	0.0743692	620	0.371257	0.50334
Gohir.D13G072800	196	0.0711434	63	0.0836653	570	0.341317	0.496126
Gohir.A04G088500	162	0.0588022	51	0.0677291	616	0.368862	0.495394
Gohir.D05G292600	213	0.077314	178	0.236388	293	0.175449	0.489151
Gohir.A07G054000	593	0.215245	205	0.272244	0	0	0.487489
Gohir.A02G164200	34	0.0123412	15	0.0199203	759	0.454491	0.486753
Gohir.A05G103900	438	0.158984	89	0.118194	345	0.206587	0.483764
Gohir.D05G161100	1105	0.401089	62	0.0823373	0	0	0.483426
Gohir.D07G136400	976	0.354265	95	0.126162	0	0	0.480427
Gohir.D12G121100	70	0.0254083	11	0.0146082	735	0.44012	0.480136
Gohir.A10G033000	414	0.150272	152	0.201859	210	0.125749	0.47788
Gohir.D03G098000	54	0.0196007	21	0.0278884	709	0.424551	0.47204
Gohir.A07G065100	91	0.0330309	44	0.0584329	634	0.379641	0.471105
Gohir.A07G171300	41	0.014882	30	0.0398406	692	0.414371	0.469094
Gohir.D02G093100	199	0.0722323	129	0.171315	365	0.218563	0.46211
Gohir.D02G040400	349	0.126679	76	0.10093	389	0.232934	0.460543
Gohir.D10G033800	195	0.0707804	95	0.126162	438	0.262275	0.459218
Gohir.D13G235600	271	0.0983666	30	0.0398406	535	0.320359	0.458567
Gohir.A03G122600	267	0.0969147	89	0.118194	404	0.241916	0.457025
Gohir.D07G058400	581	0.210889	182	0.2417	0	0	0.452589
Gohir.D11G051200	34	0.0123412	17	0.0225764	691	0.413772	0.44869
Gohir.A09G160800	277	0.100544	41	0.0544489	490	0.293413	0.448407
Gohir.A12G026400	45	0.0163339	8	0.0106242	697	0.417365	0.444323
Gohir.D07G012300	100	0.0362976	43	0.0571049	578	0.346108	0.43951
Gohir.D06G029700	282	0.102359	253	0.335989	0	0	0.438349
Gohir.A03G034800	344	0.124864	109	0.144754	279	0.167066	0.436684
Gohir.D11G209000	293	0.106352	139	0.184595	243	0.145509	0.436456
Gohir.A01G150200	416	0.150998	84	0.111554	290	0.173653	0.436205
Gohir.D11G037700	79	0.0286751	24	0.0318725	626	0.37485	0.435398
Gohir.A03G034900	280	0.101633	76	0.10093	384	0.22994	0.432503
Gohir.D10G213600	95	0.0344828	22	0.0292165	615	0.368263	0.431963
Gohir.A08G168200	119	0.0431942	16	0.0212483	612	0.366467	0.43091
Gohir.A07G128500	2	0.000725953	1	0.00132802	712	0.426347	0.428401
Gohir.D12G208900	72	0.0261343	22	0.0292165	620	0.371257	0.426608
Gohir.A12G116300	903	0.327768	73	0.0969456	0	0	0.424713
Gohir.D07G211500	1070	0.388385	25	0.0332005	0	0	0.421585
Gohir.A05G291500	229	0.0831216	80	0.106242	379	0.226946	0.416309
Gohir.D05G244600	261	0.0947368	74	0.0982736	371	0.222156	0.415166
Gohir.A02G099000	288	0.104537	34	0.0451527	442	0.264671	0.414361
Gohir.A11G047600	23	0.00834846	9	0.0119522	653	0.391018	0.411319
Gohir.A12G139400	896	0.325227	63	0.0836653	0	0	0.408892
Gohir.A10G034900	98	0.0355717	3	0.00398406	614	0.367665	0.40722
Gohir.D04G046300	162	0.0588022	37	0.0491368	495	0.296407	0.404346
Gohir.A01G156400	28	0.0101633	10	0.0132802	636	0.380838	0.404282
Gohir.A12G215300	79	0.0286751	39	0.0517928	538	0.322156	0.402624
Gohir.D12G173000	51	0.0185118	7	0.00929615	615	0.368263	0.396071
Gohir.A03G064800	36	0.0130672	24	0.0318725	585	0.350299	0.395239
Gohir.D11G110500	151	0.0548094	18	0.0239044	525	0.314371	0.393085
Gohir.A12G117500	299	0.10853	72	0.0956175	315	0.188623	0.39277
Gohir.D01G215400	162	0.0588022	121	0.160691	287	0.171856	0.391349
Gohir.A05G377900	92	0.0333938	71	0.0942895	435	0.260479	0.388162
Gohir.D07G066100	61	0.0221416	4	0.00531209	597	0.357485	0.384939
Gohir.A12G169700	66	0.0239564	8	0.0106242	584	0.349701	0.384281
Gohir.D10G208450	76	0.0275862	29	0.0385126	531	0.317964	0.384063
Gohir.D05G359900	818	0.296915	65	0.0863214	0	0	0.383236
Gohir.A11G173900	235	0.0852995	33	0.0438247	420	0.251497	0.380621
Gohir.A13G072700	47	0.0170599	24	0.0318725	549	0.328743	0.377675
Gohir.A03G113400	587	0.213067	123	0.163347	0	0	0.376414
Gohir.D01G143500	271	0.0983666	36	0.0478088	382	0.228743	0.374918
Gohir.A13G230100	80	0.0290381	29	0.0385126	513	0.307186	0.374736
Gohir.A05G374700	942	0.341924	22	0.0292165	0	0	0.37114
Gohir.A11G034200	32	0.0116152	10	0.0132802	576	0.34491	0.369806
Gohir.D12G256300	18	0.00653357	16	0.0212483	571	0.341916	0.369698
Gohir.D12G273200	63	0.0228675	5	0.00664011	565	0.338323	0.367831
Gohir.D12G119800	607	0.220327	111	0.14741	0	0	0.367737
Gohir.A11G105600	269	0.0976407	10	0.0132802	427	0.255689	0.366609
Gohir.D05G201940	47	0.0170599	3	0.00398406	570	0.341317	0.362361
Gohir.A05G199000	208	0.0754991	40	0.0531208	385	0.230539	0.359159
Gohir.D04G129000	68	0.0246824	26	0.0345286	496	0.297006	0.356217
Gohir.A01G167300	277	0.100544	74	0.0982736	261	0.156287	0.355105
Gohir.A05G403400	534	0.193829	42	0.0557769	172	0.102994	0.3526
Gohir.D03G143400	27	0.00980036	5	0.00664011	559	0.334731	0.351171
Gohir.A07G132100	857	0.311071	28	0.0371846	0	0	0.348255
Gohir.D10G243400	827	0.300181	34	0.0451527	0	0	0.345334
Gohir.D08G174900	478	0.173503	128	0.169987	0	0	0.343489
Gohir.D05G292900	128	0.046461	46	0.061089	394	0.235928	0.343478
Gohir.A04G031300	850	0.30853	26	0.0345286	0	0	0.343058
Gohir.D12G151700	68	0.0246824	67	0.0889774	383	0.229341	0.343001
Gohir.D03G084900	183	0.0664247	50	0.0664011	349	0.208982	0.341808
Gohir.A13G206800	156	0.0566243	13	0.0172643	445	0.266467	0.340356
Gohir.A07G023600	205	0.0744102	122	0.162019	173	0.103593	0.340022
Gohir.D13G235700	27	0.00980036	14	0.0185923	519	0.310778	0.339171
Gohir.D03G029100	43	0.015608	49	0.065073	430	0.257485	0.338166
Gohir.D09G156500	235	0.0852995	190	0.252324	0	0	0.337623
Gohir.D09G041050	137	0.0497278	9	0.0119522	457	0.273653	0.335333
Gohir.D02G145200	243	0.0882033	15	0.0199203	378	0.226347	0.334471
Gohir.A02G095700	99	0.0359347	45	0.059761	395	0.236527	0.332223
Gohir.D08G153800	21	0.0076225	8	0.0106242	524	0.313772	0.332019
Gohir.A01G020800	789	0.286388	34	0.0451527	0	0	0.331541
Gohir.D01G019300	779	0.282759	35	0.0464807	0	0	0.329239
Gohir.D07G000300	186	0.0675136	16	0.0212483	396	0.237126	0.325888
Gohir.D11G106400	21	0.0076225	5	0.00664011	520	0.311377	0.32564
Gohir.D05G206200	79	0.0286751	6	0.00796813	481	0.288024	0.324667
Gohir.D07G135800	256	0.092922	20	0.0265604	339	0.202994	0.322476
Gohir.A07G002000	50	0.0181488	34	0.0451527	431	0.258084	0.321385
Gohir.A06G133404	736	0.267151	40	0.0531208	0	0	0.320271
Gohir.D08G144300	165	0.0598911	127	0.168659	145	0.086826	0.315376
Gohir.D05G103700	482	0.174955	105	0.139442	0	0	0.314397
Gohir.A04G101400	25	0.00907441	7	0.00929615	494	0.295808	0.314179
Gohir.A04G109440	155	0.0562613	38	0.0504648	346	0.207186	0.313912
Gohir.D11G011800	8	0.00290381	1	0.00132802	517	0.309581	0.313813
Gohir.D06G107100	97	0.0352087	18	0.0239044	425	0.254491	0.313604
Gohir.D12G217900	35	0.0127042	34	0.0451527	427	0.255689	0.313546
Gohir.D07G069800	53	0.0192378	26	0.0345286	429	0.256886	0.310653
Gohir.A08G095300	244	0.0885662	167	0.22178	0	0	0.310346
Gohir.A10G205300	77	0.0279492	46	0.061089	369	0.220958	0.309996
Gohir.D03G133500	108	0.0392015	52	0.0690571	335	0.200599	0.308857
Gohir.D04G012200	418	0.151724	40	0.0531208	169	0.101198	0.306043
Gohir.A11G214400	133	0.0482759	38	0.0504648	346	0.207186	0.305926
Gohir.A07G133500	30	0.0108893	37	0.0491368	410	0.245509	0.305535
Gohir.A11G070000	105	0.0381125	21	0.0278884	396	0.237126	0.303127
Gohir.A01G066800	37	0.0134301	14	0.0185923	450	0.269461	0.301484
Gohir.D09G015200	600	0.217786	63	0.0836653	0	0	0.301451
Gohir.D01G073200	67	0.0243194	35	0.0464807	382	0.228743	0.299543
Gohir.A05G027000	464	0.168421	97	0.128818	0	0	0.297239
Gohir.A11G227600	415	0.150635	106	0.14077	0	0	0.291405
Gohir.A11G093900	73	0.0264973	2	0.00265604	437	0.261677	0.29083
Gohir.A08G196600	63	0.0228675	22	0.0292165	396	0.237126	0.28921
Gohir.A12G147100	80	0.0290381	18	0.0239044	390	0.233533	0.286475
Gohir.D12G244800	256	0.092922	50	0.0664011	212	0.126946	0.286269
Gohir.D07G083800	219	0.0794918	33	0.0438247	271	0.162275	0.285592
Gohir.D08G174200	238	0.0863884	52	0.0690571	217	0.12994	0.285386
Gohir.A13G156700	92	0.0333938	31	0.0411687	351	0.21018	0.284742
Gohir.A01G143100	223	0.0809437	96	0.12749	126	0.075449	0.283883
Gohir.D07G132900	5	0.00181488	1	0.00132802	467	0.279641	0.282784
Gohir.A08G167600	383	0.13902	108	0.143426	0	0	0.282446
Gohir.D01G054000	58	0.0210526	34	0.0451527	359	0.21497	0.281175
Gohir.A05G134900	402	0.145917	101	0.13413	0	0	0.280047
Gohir.D07G149600	450	0.163339	86	0.11421	0	0	0.277549
Gohir.A03G192100	7	0.00254083	8	0.0106242	441	0.264072	0.277237
Gohir.D08G186800	64	0.0232305	4	0.00531209	414	0.247904	0.276447
Gohir.D11G098900	118	0.0428312	35	0.0464807	312	0.186826	0.276138
Gohir.A13G036700	144	0.0522686	104	0.138114	141	0.084431	0.274814
Gohir.D12G168800	459	0.166606	81	0.10757	0	0	0.274176
Gohir.D12G219400	49	0.0177858	9	0.0119522	408	0.244311	0.274049
Gohir.A12G110600	25	0.00907441	5	0.00664011	428	0.256287	0.272002
Gohir.D08G106800	218	0.0791289	144	0.191235	0	0	0.270364
Gohir.A05G365800	671	0.243557	20	0.0265604	0	0	0.270118
Gohir.A05G203000	102	0.0370236	16	0.0212483	353	0.211377	0.269649
Gohir.D03G016000	23	0.00834846	3	0.00398406	429	0.256886	0.269219
Gohir.D04G049200	712	0.258439	8	0.0106242	0	0	0.269063
Gohir.A12G081000	83	0.030127	45	0.059761	299	0.179042	0.26893
Gohir.D11G016700	26	0.00943739	11	0.0146082	408	0.244311	0.268357
Gohir.A02G151200	22	0.00798548	6	0.00796813	420	0.251497	0.267451
Gohir.A07G012500	21	0.0076225	20	0.0265604	389	0.232934	0.267117
Gohir.A09G051400	39	0.0141561	11	0.0146082	398	0.238323	0.267088
Gohir.D05G226300	63	0.0228675	19	0.0252324	365	0.218563	0.266663
Gohir.D12G128700	119	0.0431942	19	0.0252324	330	0.197605	0.266031
Gohir.D09G198800	33	0.0119782	14	0.0185923	391	0.234132	0.264702
Gohir.D06G219100	167	0.0606171	117	0.155378	76	0.045509	0.261505
Gohir.A05G298700	32	0.0116152	29	0.0385126	347	0.207784	0.257912
Gohir.A13G050400	7	0.00254083	20	0.0265604	382	0.228743	0.257844
Gohir.D03G087700	88	0.0319419	10	0.0132802	355	0.212575	0.257797
Gohir.A08G179400	30	0.0108893	10	0.0132802	389	0.232934	0.257104
Gohir.A03G150700	62	0.0225045	24	0.0318725	331	0.198204	0.252581
Gohir.D04G037800	70	0.0254083	43	0.0571049	283	0.169461	0.251974
Gohir.A01G115300	483	0.175318	57	0.0756972	0	0	0.251015
Gohir.A03G196600	21	0.0076225	11	0.0146082	381	0.228144	0.250374
Gohir.D12G068300	329	0.119419	98	0.130146	0	0	0.249565
Gohir.A13G154100	84	0.03049	28	0.0371846	301	0.18024	0.247914
Gohir.A09G205100	42	0.015245	30	0.0398406	322	0.192814	0.2479
Gohir.A12G062200	548	0.198911	36	0.0478088	0	0	0.24672
Gohir.D08G213800	8	0.00290381	4	0.00531209	396	0.237126	0.245342
Gohir.A10G071300	16	0.00580762	5	0.00664011	388	0.232335	0.244783
Gohir.D08G117200	72	0.0261343	33	0.0438247	291	0.174251	0.24421
Gohir.D03G135500	103	0.0373866	32	0.0424967	272	0.162874	0.242758
Gohir.A02G164100	15	0.00544465	6	0.00796813	383	0.229341	0.242754
Gohir.D11G114200	31	0.0112523	10	0.0132802	363	0.217365	0.241898
Gohir.D09G145100	68	0.0246824	39	0.0517928	276	0.165269	0.241745
Gohir.D13G220200	573	0.207985	23	0.0305445	0	0	0.23853
Gohir.A09G014900	557	0.202178	27	0.0358566	0	0	0.238034
Gohir.A13G062200	56	0.0203267	7	0.00929615	348	0.208383	0.238006
Gohir.D10G101400	9	0.00326679	13	0.0172643	363	0.217365	0.237896
Gohir.A13G061400	192	0.0696915	31	0.0411687	211	0.126347	0.237207
Gohir.D02G217800	43	0.015608	8	0.0106242	352	0.210778	0.237011
Gohir.D01G106300	370	0.134301	77	0.102258	0	0	0.236559
Gohir.A02G156100	199	0.0722323	45	0.059761	174	0.104192	0.236185
Gohir.A01G087000	22	0.00798548	5	0.00664011	369	0.220958	0.235584
Gohir.D05G136900	339	0.123049	84	0.111554	0	0	0.234603
Gohir.D11G249900	38	0.0137931	22	0.0292165	317	0.18982	0.23283
Gohir.D05G345000	0	0	1	0.00132802	384	0.22994	0.231268
Gohir.A09G149200	46	0.0166969	18	0.0239044	318	0.190419	0.23102
Gohir.A12G200700	247	0.0896552	67	0.0889774	86	0.051497	0.23013
Gohir.A11G246200	49	0.0177858	31	0.0411687	284	0.17006	0.229014
Gohir.D09G064200	167	0.0606171	73	0.0969456	119	0.071257	0.22882
Gohir.A12G016900	24	0.00871143	12	0.0159363	340	0.203593	0.228241
Gohir.D12G136200	14	0.00508167	12	0.0159363	346	0.207186	0.228204
Gohir.A10G179600	92	0.0333938	14	0.0185923	293	0.175449	0.227435
Gohir.A05G270000	309	0.11216	9	0.0119522	172	0.102994	0.227106
Gohir.D09G220800	324	0.117604	82	0.108898	0	0	0.226502
Gohir.D08G186400	316	0.114701	84	0.111554	0	0	0.226254
Gohir.A02G105200	506	0.183666	32	0.0424967	0	0	0.226163
Gohir.A06G021900	68	0.0246824	32	0.0424967	265	0.158683	0.225862
Gohir.D04G161000	177	0.0642468	7	0.00929615	254	0.152096	0.225639
Gohir.A07G043600	68	0.0246824	35	0.0464807	257	0.153892	0.225055
Gohir.D04G166600	59	0.0214156	23	0.0305445	287	0.171856	0.223816
Gohir.A05G101500	76	0.0275862	10	0.0132802	305	0.182635	0.223501
Gohir.D11G341900	127	0.046098	50	0.0664011	185	0.110778	0.223278
Gohir.A03G032900	100	0.0362976	28	0.0371846	249	0.149102	0.222584
Gohir.A03G182000	17	0.0061706	0	0	361	0.216168	0.222338
Gohir.D12G143700	297	0.107804	86	0.11421	0	0	0.222014
Gohir.A05G128600	89	0.0323049	20	0.0265604	272	0.162874	0.22174
Gohir.A12G243800	90	0.0326679	17	0.0225764	278	0.166467	0.221711
Gohir.A11G091800	199	0.0722323	112	0.148738	0	0	0.220971
Gohir.A03G177600	19	0.00689655	7	0.00929615	341	0.204192	0.220384
Gohir.D06G019045	522	0.189474	23	0.0305445	0	0	0.220018
Gohir.A11G100500	342	0.124138	72	0.0956175	0	0	0.219755
Gohir.D11G034000	517	0.187659	24	0.0318725	0	0	0.219531
Gohir.D12G275100	176	0.0638838	116	0.15405	0	0	0.217934
Gohir.D12G017600	18	0.00653357	23	0.0305445	302	0.180838	0.217916
Gohir.A06G199100	11	0.00399274	8	0.0106242	339	0.202994	0.217611
Gohir.A09G016600	422	0.153176	48	0.063745	0	0	0.216921
Gohir.A01G071033	136	0.0493648	126	0.167331	0	0	0.216695
Gohir.A13G105000	329	0.119419	73	0.0969456	0	0	0.216365
Gohir.A10G070500	485	0.176044	29	0.0385126	0	0	0.214556
Gohir.D06G135700	495	0.179673	26	0.0345286	0	0	0.214202
Gohir.D12G026000	12	0.00435572	16	0.0212483	314	0.188024	0.213628
Gohir.D11G181000	89	0.0323049	25	0.0332005	247	0.147904	0.21341
Gohir.D02G201300	16	0.00580762	7	0.00929615	330	0.197605	0.212709
Gohir.D02G115900	292	0.105989	80	0.106242	0	0	0.212231
Gohir.D11G031100	41	0.014882	34	0.0451527	254	0.152096	0.212131
Gohir.D01G101100	144	0.0522686	35	0.0464807	189	0.113174	0.211923
Gohir.A11G028100	101	0.0366606	54	0.0717131	172	0.102994	0.211368
Gohir.A11G253900	54	0.0196007	23	0.0305445	269	0.161078	0.211223
Gohir.A11G027500	400	0.145191	49	0.065073	0	0	0.210264
Gohir.D08G037301	33	0.0119782	2	0.00265604	326	0.19521	0.209844
Gohir.D11G263800	406	0.147368	47	0.062417	0	0	0.209785
Gohir.D06G219200	63	0.0228675	46	0.061089	210	0.125749	0.209705
Gohir.D05G028900	443	0.160799	36	0.0478088	0	0	0.208607
Gohir.A05G090200	43	0.015608	16	0.0212483	286	0.171257	0.208114
Gohir.A12G165700	442	0.160436	33	0.0438247	0	0	0.20426
Gohir.A05G247400	15	0.00544465	32	0.0424967	260	0.155689	0.20363
Gohir.A10G169200	28	0.0101633	8	0.0106242	302	0.180838	0.201626
Gohir.A06G202500	43	0.015608	23	0.0305445	259	0.15509	0.201242
Gohir.A05G291800	50	0.0181488	13	0.0172643	276	0.165269	0.200683
Gohir.A04G012200	19	0.00689655	1	0.00132802	320	0.191617	0.199841
Gohir.D04G140500	54	0.0196007	16	0.0212483	264	0.158084	0.198933
Gohir.D11G203400	128	0.046461	46	0.061089	152	0.091018	0.198568
Gohir.D12G143900	426	0.154628	33	0.0438247	0	0	0.198453
Gohir.D13G236400	357	0.129583	51	0.0677291	0	0	0.197312
Gohir.A03G116200	343	0.124501	54	0.0717131	0	0	0.196214
Gohir.A01G033500	110	0.0399274	53	0.0703851	142	0.08503	0.195342
Gohir.D05G101300	103	0.0373866	32	0.0424967	192	0.11497	0.194853
Gohir.A05G331000	244	0.0885662	80	0.106242	0	0	0.194808
Gohir.A07G078700	178	0.0646098	31	0.0411687	148	0.088623	0.194401
Gohir.A13G144700	458	0.166243	21	0.0278884	0	0	0.194132
Gohir.A11G016900	3	0.00108893	7	0.00929615	306	0.183234	0.193619
Gohir.A04G119400	35	0.0127042	9	0.0119522	282	0.168862	0.193519
Gohir.A05G311400	99	0.0359347	13	0.0172643	234	0.14012	0.193319
Gohir.D12G049900	175	0.0635209	37	0.0491368	134	0.08024	0.192897
Gohir.A13G111375	328	0.119056	55	0.0730412	0	0	0.192097
Gohir.D01G135000	73	0.0264973	35	0.0464807	198	0.118563	0.191541
Gohir.A07G019800	276	0.100181	68	0.0903054	0	0	0.190487
Gohir.A13G037600	19	0.00689655	13	0.0172643	277	0.165868	0.190029
Gohir.A11G110000	5	0.00181488	6	0.00796813	301	0.18024	0.190023
Gohir.D02G203700	9	0.00326679	4	0.00531209	303	0.181437	0.190016
Gohir.D05G160900	174	0.0631579	30	0.0398406	145	0.086826	0.189825
Gohir.D03G024500	146	0.0529946	16	0.0212483	192	0.11497	0.189213
Gohir.D01G136800	298	0.108167	61	0.0810093	0	0	0.189176
Gohir.A12G139500	243	0.0882033	76	0.10093	0	0	0.189133
Gohir.D03G016100	42	0.015245	11	0.0146082	265	0.158683	0.188536
Gohir.D06G112800	2	0.000725953	4	0.00531209	304	0.182036	0.188074
Gohir.A08G249700	346	0.12559	45	0.059761	0	0	0.185351
Gohir.D08G149300	115	0.0417423	108	0.143426	0	0	0.185169
Gohir.A03G118000	197	0.0715064	39	0.0517928	103	0.061677	0.184976
Gohir.A10G001000	147	0.0533575	99	0.131474	0	0	0.184832
Gohir.A11G240500	40	0.0145191	6	0.00796813	271	0.162275	0.184763
Gohir.A06G095400	136	0.0493648	48	0.063745	116	0.069461	0.182571
Gohir.A06G007200	59	0.0214156	24	0.0318725	215	0.128743	0.182031
Gohir.A08G153300	254	0.092196	19	0.0252324	107	0.064072	0.1815
Gohir.D04G162500	80	0.0290381	34	0.0451527	179	0.107186	0.181376
Gohir.D02G114400	185	0.0671506	86	0.11421	0	0	0.18136
Gohir.A01G112800	94	0.0341198	36	0.0478088	166	0.099401	0.18133
Gohir.D08G124900	360	0.130672	38	0.0504648	0	0	0.181136
Gohir.D08G034500	2	0.000725953	0	0	300	0.179641	0.180367
Gohir.A10G058700	248	0.0900181	68	0.0903054	0	0	0.180324
Gohir.A11G258100	387	0.140472	30	0.0398406	0	0	0.180313
Gohir.A06G039900	13	0.00471869	32	0.0424967	222	0.132934	0.18015
Gohir.A13G216600	367	0.133212	35	0.0464807	0	0	0.179693
Gohir.A12G100400	173	0.0627949	88	0.116866	0	0	0.179661
Gohir.A08G106000	50	0.0181488	7	0.00929615	253	0.151497	0.178942
Gohir.A01G083800	52	0.0188748	9	0.0119522	245	0.146707	0.177534
Gohir.D05G194300	83	0.030127	23	0.0305445	195	0.116766	0.177438
Gohir.D10G001200	148	0.0537205	93	0.123506	0	0	0.177226
Gohir.A11G099900	113	0.0410163	28	0.0371846	165	0.098802	0.177003
Gohir.D08G147500	113	0.0410163	10	0.0132802	204	0.122156	0.176452
Gohir.A08G236500	75	0.0272232	38	0.0504648	164	0.098204	0.175892
Gohir.D01G102700	71	0.0257713	21	0.0278884	204	0.122156	0.175815
Gohir.A10G027000	374	0.135753	30	0.0398406	0	0	0.175594
Gohir.A12G095200	434	0.157532	12	0.0159363	0	0	0.173468
Gohir.A11G220200	67	0.0243194	22	0.0292165	200	0.11976	0.173296
Gohir.D02G066100	52	0.0188748	26	0.0345286	200	0.11976	0.173164
Gohir.A11G083600	231	0.0838476	67	0.0889774	0	0	0.172825
Gohir.D13G108200	267	0.0969147	57	0.0756972	0	0	0.172612
Gohir.A07G096900	251	0.0911071	61	0.0810093	0	0	0.172116
Gohir.D08G198000	20	0.00725953	5	0.00664011	263	0.157485	0.171385
Gohir.D11G106932	32	0.0116152	7	0.00929615	251	0.150299	0.171211
Gohir.A04G124500	52	0.0188748	22	0.0292165	204	0.122156	0.170247
Gohir.A12G153000	316	0.114701	41	0.0544489	0	0	0.169149
Gohir.D08G270500	396	0.143739	19	0.0252324	0	0	0.168971
Gohir.D07G153200	62	0.0225045	2	0.00265604	240	0.143713	0.168873
Gohir.D05G272000	91	0.0330309	11	0.0146082	202	0.120958	0.168597
Gohir.A09G186966	14	0.00508167	3	0.00398406	266	0.159281	0.168347
Gohir.A11G030701	427	0.154991	10	0.0132802	0	0	0.168271
Gohir.D12G228300	43	0.015608	7	0.00929615	238	0.142515	0.167419
Gohir.A11G097600	383	0.13902	21	0.0278884	0	0	0.166908
Gohir.A05G305000	177	0.0642468	77	0.102258	0	0	0.166504
Gohir.A05G291700	37	0.0134301	9	0.0119522	235	0.140719	0.166101
Gohir.D05G248900	111	0.0402904	28	0.0371846	148	0.088623	0.166098
Gohir.D12G136600	333	0.120871	34	0.0451527	0	0	0.166024
Gohir.D13G161500	13	0.00471869	4	0.00531209	259	0.15509	0.165121
Gohir.D09G181800	26	0.00943739	7	0.00929615	243	0.145509	0.164243
Gohir.A13G215700	18	0.00653357	51	0.0677291	149	0.089222	0.163484
Gohir.A09G244000	213	0.077314	64	0.0849934	0	0	0.162307
Gohir.A09G189300	10	0.00362976	6	0.00796813	251	0.150299	0.161897
Gohir.A05G204200	109	0.0395644	33	0.0438247	130	0.077844	0.161233
Gohir.D01G126000	271	0.0983666	47	0.062417	0	0	0.160784
Gohir.A04G121000	23	0.00834846	28	0.0371846	189	0.113174	0.158707
Gohir.D11G192300	56	0.0203267	9	0.0119522	211	0.126347	0.158626
Gohir.D09G236600	48	0.0174229	26	0.0345286	174	0.104192	0.156143
Gohir.A07G131900	269	0.0976407	44	0.0584329	0	0	0.156074
Gohir.D13G158700	53	0.0192378	16	0.0212483	190	0.113772	0.154259
Gohir.D13G180900	216	0.0784029	57	0.0756972	0	0	0.1541
Gohir.D02G082400	11	0.00399274	17	0.0225764	212	0.126946	0.153515
Gohir.A04G062201	301	0.109256	33	0.0438247	0	0	0.153081
Gohir.A10G008200	96	0.0348457	55	0.0730412	74	0.044311	0.152198
Gohir.D06G040800	12	0.00435572	2	0.00265604	240	0.143713	0.150724
Gohir.D12G156400	276	0.100181	37	0.0491368	0	0	0.149318
Gohir.A12G132800	46	0.0166969	8	0.0106242	203	0.121557	0.148878
Gohir.D05G312500	18	0.00653357	7	0.00929615	221	0.132335	0.148165
Gohir.A08G154032	220	0.0798548	51	0.0677291	0	0	0.147584
Gohir.D06G003300	27	0.00980036	8	0.0106242	212	0.126946	0.147371
Gohir.D11G268100	343	0.124501	17	0.0225764	0	0	0.147077
Gohir.A01G143900	261	0.0947368	39	0.0517928	0	0	0.14653
Gohir.D03G078600	369	0.133938	9	0.0119522	0	0	0.14589
Gohir.D09G114000	100	0.0362976	41	0.0544489	92	0.05509	0.145836
Gohir.D11G286100	206	0.0747731	53	0.0703851	0	0	0.145158
Gohir.D06G189700	252	0.0914701	40	0.0531208	0	0	0.144591
Gohir.D09G151500	1	0.000362976	1	0.00132802	238	0.142515	0.144206
Gohir.A12G119100	15	0.00544465	9	0.0119522	211	0.126347	0.143744
Gohir.A05G177600	318	0.115426	21	0.0278884	0	0	0.143315
Gohir.D02G067300	29	0.0105263	3	0.00398406	215	0.128743	0.143253
Gohir.D13G219400	35	0.0127042	24	0.0318725	164	0.098204	0.14278
Gohir.A03G000030	13	0.00471869	11	0.0146082	206	0.123353	0.14268
Gohir.A12G133100	118	0.0428312	9	0.0119522	146	0.087425	0.142209
Gohir.A08G024100	7	0.00254083	2	0.00265604	228	0.136527	0.141724
Gohir.A12G079700	177	0.0642468	58	0.0770252	0	0	0.141272
Gohir.A03G000700	23	0.00834846	7	0.00929615	205	0.122754	0.140399
Gohir.A07G144400	115	0.0417423	74	0.0982736	0	0	0.140016
Gohir.D01G103600	274	0.0994555	30	0.0398406	0	0	0.139296
Gohir.A08G221668	5	0.00181488	7	0.00929615	214	0.128144	0.139255
Gohir.D10G060400	204	0.0740472	49	0.065073	0	0	0.13912
Gohir.D06G023700	56	0.0203267	24	0.0318725	144	0.086228	0.138427
Gohir.A02G061700	41	0.014882	15	0.0199203	173	0.103593	0.138395
Gohir.A08G198800	63	0.0228675	22	0.0292165	144	0.086228	0.138312
Gohir.A12G274400	117	0.0424682	72	0.0956175	0	0	0.138086
Gohir.D11G288400	22	0.00798548	2	0.00265604	210	0.125749	0.13639
Gohir.D03G126700	218	0.0791289	43	0.0571049	0	0	0.136234
Gohir.A11G102300	100	0.0362976	75	0.0996016	0	0	0.135899
Gohir.D13G001800	120	0.0435572	15	0.0199203	120	0.071856	0.135334
Gohir.D02G139900	77	0.0279492	17	0.0225764	141	0.084431	0.134957
Gohir.A07G167300	99	0.0359347	21	0.0278884	118	0.070659	0.134482
Gohir.D11G001300	319	0.115789	14	0.0185923	0	0	0.134382
Gohir.D02G119800	63	0.0228675	19	0.0252324	144	0.086228	0.134327
Gohir.D06G031800	129	0.046824	65	0.0863214	0	0	0.133145
Gohir.D11G240100	213	0.077314	42	0.0557769	0	0	0.133091
Gohir.A06G094200	212	0.076951	42	0.0557769	0	0	0.132728
Gohir.D08G241700	28	0.0101633	15	0.0199203	169	0.101198	0.131281
Gohir.A06G031300	55	0.0199637	25	0.0332005	130	0.077844	0.131009
Gohir.D06G095500	82	0.0297641	37	0.0491368	87	0.052096	0.130997
Gohir.D11G188500	306	0.111071	15	0.0199203	0	0	0.130991
Gohir.D12G103400	31	0.0112523	90	0.119522	0	0	0.130774
Gohir.D11G087700	212	0.076951	40	0.0531208	0	0	0.130072
Gohir.A09G065200	86	0.031216	36	0.0478088	85	0.050898	0.129923
Gohir.D06G030500	20	0.00725953	1	0.00132802	202	0.120958	0.129546
Gohir.A04G037900	23	0.00834846	10	0.0132802	180	0.107784	0.129413
Gohir.D05G165000	132	0.0479129	61	0.0810093	0	0	0.128922
Gohir.A02G052901	88	0.0319419	73	0.0969456	0	0	0.128887
Gohir.D02G086250	0	0	0	0	214	0.128144	0.128144
Gohir.A08G126200	55	0.0199637	8	0.0106242	162	0.097006	0.127594
Gohir.D10G175500	87	0.0315789	22	0.0292165	111	0.066467	0.127262
Gohir.A02G072400	94	0.0341198	11	0.0146082	131	0.078443	0.127171
Gohir.A05G273300	63	0.0228675	77	0.102258	0	0	0.125125
Gohir.A13G134600	191	0.0693285	42	0.0557769	0	0	0.125105
Gohir.A12G065466	21	0.0076225	5	0.00664011	185	0.110778	0.125041
Gohir.D10G008000	109	0.0395644	37	0.0491368	58	0.034731	0.123432
Gohir.D02G139000	142	0.0515427	54	0.0717131	0	0	0.123256
Gohir.D09G015000	74	0.0268603	72	0.0956175	0	0	0.122478
Gohir.D11G026700	204	0.0740472	36	0.0478088	0	0	0.121856
Gohir.D12G210800	31	0.0112523	7	0.00929615	168	0.100599	0.121147
Gohir.A11G275700	136	0.0493648	54	0.0717131	0	0	0.121078
Gohir.A09G117100	171	0.062069	10	0.0132802	76	0.045509	0.120858
Gohir.D12G113600	8	0.00290381	3	0.00398406	190	0.113772	0.12066
Gohir.D11G105200	243	0.0882033	24	0.0318725	0	0	0.120076
Gohir.D13G149400	221	0.0802178	30	0.0398406	0	0	0.120058
Gohir.A12G271900	290	0.105263	11	0.0146082	0	0	0.119871
Gohir.A07G047300	96	0.0348457	8	0.0106242	124	0.074251	0.119721
Gohir.A02G011700	129	0.046824	24	0.0318725	68	0.040719	0.119415
Gohir.A08G000092	50	0.0181488	21	0.0278884	122	0.073054	0.119091
Gohir.A01G097000	180	0.0653358	40	0.0531208	0	0	0.118457
Gohir.D12G203500	87	0.0315789	28	0.0371846	79	0.047305	0.116069
Gohir.A02G129800	143	0.0519056	48	0.063745	0	0	0.115651
Gohir.A11G038500	119	0.0431942	21	0.0278884	74	0.044311	0.115394
Gohir.A09G219000	288	0.104537	8	0.0106242	0	0	0.115161
Gohir.D03G060612	144	0.0522686	47	0.062417	0	0	0.114686
Gohir.A11G084100	187	0.0678766	35	0.0464807	0	0	0.114357
Gohir.A03G116600	157	0.0569873	43	0.0571049	0	0	0.114092
Gohir.A01G137643	131	0.0475499	50	0.0664011	0	0	0.113951
Gohir.A03G091400	106	0.0384755	18	0.0239044	86	0.051497	0.113877
Gohir.D05G207400	54	0.0196007	16	0.0212483	121	0.072455	0.113304
Gohir.D11G195101	45	0.0163339	73	0.0969456	0	0	0.113279
Gohir.A05G266900	285	0.103448	7	0.00929615	0	0	0.112744
Gohir.D11G256400	2	0.000725953	0	0	186	0.111377	0.112103
Gohir.A11G049100	102	0.0370236	56	0.0743692	0	0	0.111393
Gohir.D02G093000	149	0.0540835	43	0.0571049	0	0	0.111188
Gohir.A06G011800	119	0.0431942	51	0.0677291	0	0	0.110923
Gohir.A12G125000	56	0.0203267	8	0.0106242	133	0.079641	0.110592
Gohir.D11G102300	65	0.0235935	4	0.00531209	136	0.081437	0.110343
Gohir.D13G114000	66	0.0239564	65	0.0863214	0	0	0.110278
Gohir.A08G111000	95	0.0344828	57	0.0756972	0	0	0.11018
Gohir.D09G100700	18	0.00653357	3	0.00398406	166	0.099401	0.109919
Gohir.A02G064500	39	0.0141561	16	0.0212483	124	0.074251	0.109656
Gohir.A11G307000	55	0.0199637	17	0.0225764	112	0.067066	0.109606
Gohir.A01G114100	20	0.00725953	77	0.102258	0	0	0.109517
Gohir.A07G100200	1	0.000362976	0	0	182	0.108982	0.109345
Gohir.D07G172700	77	0.0279492	17	0.0225764	98	0.058683	0.109208
Gohir.A13G230900	213	0.077314	24	0.0318725	0	0	0.109186
Gohir.D07G051500	72	0.0261343	3	0.00398406	132	0.079042	0.10916
Gohir.D12G122900	2	0.000725953	2	0.00265604	176	0.105389	0.108771
Gohir.A02G060700	24	0.00871143	9	0.0119522	147	0.088024	0.108688
Gohir.D03G011100	152	0.0551724	40	0.0531208	0	0	0.108293
Gohir.A05G285300	181	0.0656987	32	0.0424967	0	0	0.108195
Gohir.D06G097200	38	0.0137931	5	0.00664011	146	0.087425	0.107858
Gohir.D03G051700	32	0.0116152	2	0.00265604	155	0.092814	0.107086
Gohir.D08G149900	68	0.0246824	62	0.0823373	0	0	0.10702
Gohir.D02G137700	31	0.0112523	6	0.00796813	146	0.087425	0.106646
Gohir.D11G156600	29	0.0105263	6	0.00796813	147	0.088024	0.106518
Gohir.D02G070600	34	0.0123412	10	0.0132802	135	0.080838	0.10646
Gohir.A06G086800	142	0.0515427	41	0.0544489	0	0	0.105992
Gohir.A12G241200	244	0.0885662	13	0.0172643	0	0	0.105831
Gohir.A05G147300	68	0.0246824	9	0.0119522	115	0.068862	0.105497
Gohir.D11G322500	20	0.00725953	23	0.0305445	113	0.067665	0.105469
Gohir.D07G048000	40	0.0145191	17	0.0225764	114	0.068263	0.105359
Gohir.D12G156300	175	0.0635209	31	0.0411687	0	0	0.10469
Gohir.D05G304200	109	0.0395644	49	0.065073	0	0	0.104637
Gohir.A05G158300	71	0.0257713	3	0.00398406	125	0.07485	0.104606
Gohir.A07G143800	171	0.062069	32	0.0424967	0	0	0.104566
Gohir.D08G122500	107	0.0388385	49	0.065073	0	0	0.103912
Gohir.A13G000200	35	0.0127042	6	0.00796813	139	0.083234	0.103906
Gohir.D01G041800	22	0.00798548	3	0.00398406	152	0.091018	0.102988
Gohir.A06G026400	4	0.00145191	6	0.00796813	156	0.093413	0.102833
Gohir.D05G207700	6	0.00217786	3	0.00398406	161	0.096407	0.102569
Gohir.D11G041800	35	0.0127042	13	0.0172643	119	0.071257	0.101226
Gohir.D07G148500	230	0.0834846	13	0.0172643	0	0	0.100749
Gohir.D03G040600	175	0.0635209	28	0.0371846	0	0	0.100705
Gohir.A11G257800	133	0.0482759	39	0.0517928	0	0	0.100069
Gohir.D11G037900	13	0.00471869	1	0.00132802	157	0.094012	0.100059
Gohir.D06G186400	22	0.00798548	3	0.00398406	147	0.088024	0.099993
Gohir.A08G109700	96	0.0348457	49	0.065073	0	0	0.099919
Gohir.D07G101401	179	0.0649728	26	0.0345286	0	0	0.099501
Gohir.D06G083400	167	0.0606171	29	0.0385126	0	0	0.09913
Gohir.A03G155300	12	0.00435572	5	0.00664011	147	0.088024	0.09902
Gohir.A01G124900	111	0.0402904	43	0.0571049	0	0	0.097395
Gohir.A04G143400	4	0.00145191	5	0.00664011	149	0.089222	0.097314
Gohir.A11G322800	128	0.046461	38	0.0504648	0	0	0.096926
Gohir.A12G051600	45	0.0163339	12	0.0159363	107	0.064072	0.096342
Gohir.D05G286200	54	0.0196007	8	0.0106242	110	0.065868	0.096093
Gohir.D12G195600	34	0.0123412	6	0.00796813	126	0.075449	0.095758
Gohir.A07G147700	171	0.062069	25	0.0332005	0	0	0.095269
Gohir.A05G162200	83	0.030127	49	0.065073	0	0	0.0952
Gohir.D11G212100	148	0.0537205	31	0.0411687	0	0	0.094889
Gohir.D05G387300	27	0.00980036	64	0.0849934	0	0	0.094794
Gohir.A01G117900	113	0.0410163	40	0.0531208	0	0	0.094137
Gohir.D04G005800	3	0.00108893	2	0.00265604	150	0.08982	0.093565
Gohir.A11G322400	71	0.0257713	10	0.0132802	90	0.053892	0.092944
Gohir.D12G128100	106	0.0384755	41	0.0544489	0	0	0.092924
Gohir.A11G287500	6	0.00217786	0	0	150	0.08982	0.091998
Gohir.A05G154900	66	0.0239564	51	0.0677291	0	0	0.091686
Gohir.D04G187002	4	0.00145191	3	0.00398406	144	0.086228	0.091664
Gohir.D10G029000	29	0.0105263	12	0.0159363	108	0.064671	0.091133
Gohir.A11G030971	186	0.0675136	17	0.0225764	0	0	0.09009
Gohir.D11G305400	21	0.0076225	0	0	137	0.082036	0.089658
Gohir.A12G052900	60	0.0217786	51	0.0677291	0	0	0.089508
Gohir.A05G048000	100	0.0362976	40	0.0531208	0	0	0.089418
Gohir.A05G138300	30	0.0108893	5	0.00664011	120	0.071856	0.089386
Gohir.D11G134400	75	0.0272232	20	0.0265604	59	0.035329	0.089113
Gohir.D11G088300	132	0.0479129	31	0.0411687	0	0	0.089082
Gohir.A13G148300	51	0.0185118	15	0.0199203	84	0.050299	0.088732
Gohir.D02G094100	68	0.0246824	16	0.0212483	71	0.042515	0.088446
Gohir.D05G196400	159	0.0577132	23	0.0305445	0	0	0.088258
Gohir.A05G390000	89	0.0323049	42	0.0557769	0	0	0.088082
Gohir.D05G307300	50	0.0181488	12	0.0159363	90	0.053892	0.087977
Gohir.D03G176500	2	0.000725953	12	0.0159363	118	0.070659	0.087321
Gohir.D05G208300	171	0.062069	19	0.0252324	0	0	0.087301
Gohir.D11G082200	136	0.0493648	28	0.0371846	0	0	0.086549
Gohir.A10G037000	120	0.0435572	8	0.0106242	54	0.032335	0.086517
Gohir.D13G173300	63	0.0228675	10	0.0132802	82	0.049102	0.08525
Gohir.A02G141200	7	0.00254083	1	0.00132802	135	0.080838	0.084707
Gohir.D01G158500	83	0.030127	41	0.0544489	0	0	0.084576
Gohir.A01G052400	16	0.00580762	2	0.00265604	127	0.076048	0.084512
Gohir.D06G086300	122	0.0442831	30	0.0398406	0	0	0.084124
Gohir.A07G117200	81	0.0294011	41	0.0544489	0	0	0.08385
Gohir.A08G156400	14	0.00508167	3	0.00398406	124	0.074251	0.083317
Gohir.D10G029650	152	0.0551724	21	0.0278884	0	0	0.083061
Gohir.D07G216000	97	0.0352087	36	0.0478088	0	0	0.083017
Gohir.D13G060500	104	0.0377495	34	0.0451527	0	0	0.082902
Gohir.A07G215100	100	0.0362976	35	0.0464807	0	0	0.082778
Gohir.D07G184800	56	0.0203267	47	0.062417	0	0	0.082744
Gohir.A05G154400	162	0.0588022	18	0.0239044	0	0	0.082707
Gohir.A11G150100	15	0.00544465	0	0	129	0.077246	0.08269
Gohir.A03G130500	96	0.0348457	36	0.0478088	0	0	0.082654
Gohir.A02G078901	0	0	0	0	138	0.082635	0.082635
Gohir.D05G061200	164	0.0595281	17	0.0225764	0	0	0.082104
Gohir.D02G003400	145	0.0526316	22	0.0292165	0	0	0.081848
Gohir.D07G208200	13	0.00471869	9	0.0119522	108	0.064671	0.081342
Gohir.D13G066800	16	0.00580762	9	0.0119522	106	0.063473	0.081233
Gohir.D05G279100	81	0.0294011	39	0.0517928	0	0	0.081194
Gohir.D05G242400	106	0.0384755	32	0.0424967	0	0	0.080972
Gohir.D11G102200	34	0.0123412	10	0.0132802	92	0.05509	0.080711
Gohir.A11G097500	33	0.0119782	8	0.0106242	97	0.058084	0.080686
Gohir.D09G013200	94	0.0341198	35	0.0464807	0	0	0.080601
Gohir.A05G059100	130	0.0471869	25	0.0332005	0	0	0.080387
Gohir.A06G097802	29	0.0105263	20	0.0265604	72	0.043114	0.080201
Gohir.A10G050900	21	0.0076225	9	0.0119522	101	0.060479	0.080054
Gohir.D13G139000	9	0.00326679	4	0.00531209	119	0.071257	0.079836
Gohir.A03G174200	64	0.0232305	13	0.0172643	65	0.038922	0.079417
Gohir.A06G179400	0	0	0	0	132	0.079042	0.079042
Gohir.A10G217400	53	0.0192378	45	0.059761	0	0	0.078999
Gohir.A10G028600	13	0.00471869	4	0.00531209	114	0.068263	0.078294
Gohir.A08G102900	119	0.0431942	26	0.0345286	0	0	0.077723
Gohir.A07G201900	13	0.00471869	17	0.0225764	84	0.050299	0.077594
Gohir.A07G210000	107	0.0388385	29	0.0385126	0	0	0.077351
Gohir.D09G096400	44	0.015971	46	0.061089	0	0	0.07706
Gohir.A12G167300	9	0.00326679	0	0	123	0.073653	0.076919
Gohir.D05G025800	148	0.0537205	17	0.0225764	0	0	0.076297
Gohir.D02G178500	9	0.00326679	3	0.00398406	115	0.068862	0.076113
Gohir.D11G104100	74	0.0268603	37	0.0491368	0	0	0.075997
Gohir.A05G227900	20	0.00725953	8	0.0106242	97	0.058084	0.075968
Gohir.A10G158300	28	0.0101633	13	0.0172643	81	0.048503	0.075931
Gohir.D05G165500	153	0.0555354	15	0.0199203	0	0	0.075456
Gohir.A11G128600	81	0.0294011	13	0.0172643	48	0.028743	0.075408
Gohir.D02G057800	39	0.0141561	46	0.061089	0	0	0.075245
Gohir.A07G185200	141	0.0511797	18	0.0239044	0	0	0.075084
Gohir.A05G020700	97	0.0352087	30	0.0398406	0	0	0.075049
Gohir.D06G093800	92	0.0333938	31	0.0411687	0	0	0.074562
Gohir.A05G204500	25	0.00907441	3	0.00398406	102	0.061078	0.074136
Gohir.A08G034500	120	0.0435572	23	0.0305445	0	0	0.074102
Gohir.A13G055300	9	0.00326679	17	0.0225764	79	0.047305	0.073149
Gohir.A13G073700	99	0.0359347	28	0.0371846	0	0	0.073119
Gohir.D05G140500	25	0.00907441	8	0.0106242	89	0.053293	0.072992
Gohir.D09G205600	26	0.00943739	14	0.0185923	75	0.04491	0.07294
Gohir.D05G149800	10	0.00362976	8	0.0106242	98	0.058683	0.072937
Gohir.D08G162600	80	0.0290381	33	0.0438247	0	0	0.072863
Gohir.A11G186400	131	0.0475499	19	0.0252324	0	0	0.072782
Gohir.D06G030400	108	0.0392015	25	0.0332005	0	0	0.072402
Gohir.A11G278300	11	0.00399274	0	0	114	0.068263	0.072256
Gohir.D11G130700	56	0.0203267	39	0.0517928	0	0	0.07212
Gohir.D08G061700	74	0.0268603	34	0.0451527	0	0	0.072013
Gohir.D10G011400	95	0.0344828	28	0.0371846	0	0	0.071667
Gohir.A02G160000	87	0.0315789	30	0.0398406	0	0	0.07142
Gohir.D10G186300	123	0.0446461	20	0.0265604	0	0	0.071207
Gohir.D08G114600	112	0.0406534	23	0.0305445	0	0	0.071198
Gohir.D12G016900	53	0.0192378	39	0.0517928	0	0	0.071031
Gohir.A03G204800	82	0.0297641	31	0.0411687	0	0	0.070933
Gohir.D02G168300	122	0.0442831	20	0.0265604	0	0	0.070844
Gohir.D01G112400	78	0.0283122	32	0.0424967	0	0	0.070809
Gohir.A11G185800	85	0.030853	30	0.0398406	0	0	0.070694
Gohir.A09G175300	77	0.0279492	32	0.0424967	0	0	0.070446
Gohir.A06G202600	25	0.00907441	15	0.0199203	69	0.041317	0.070312
Gohir.A11G211000	102	0.0370236	25	0.0332005	0	0	0.070224
Gohir.D12G077900	76	0.0275862	32	0.0424967	0	0	0.070083
Gohir.D07G176700	4	0.00145191	7	0.00929615	99	0.059281	0.070029
Gohir.D10G084000	19	0.00689655	11	0.0146082	81	0.048503	0.070008
Gohir.D12G217600	72	0.0261343	33	0.0438247	0	0	0.069959
Gohir.A10G040900	90	0.0326679	28	0.0371846	0	0	0.069852
Gohir.A02G053500	81	0.0294011	11	0.0146082	43	0.025749	0.069758
Gohir.A02G112600	97	0.0352087	26	0.0345286	0	0	0.069737
Gohir.A11G104800	60	0.0217786	36	0.0478088	0	0	0.069587
Gohir.A11G034400	4	0.00145191	2	0.00265604	109	0.065269	0.069377
Gohir.A08G130300	69	0.0250454	33	0.0438247	0	0	0.06887
Gohir.D12G092100	50	0.0181488	38	0.0504648	0	0	0.068614
Gohir.D13G059700	63	0.0228675	34	0.0451527	0	0	0.06802
Gohir.A03G116700	54	0.0196007	6	0.00796813	67	0.04012	0.067689
Gohir.A08G064100	62	0.0225045	34	0.0451527	0	0	0.067657
Gohir.D06G206400	91	0.0330309	26	0.0345286	0	0	0.067559
Gohir.D01G070200	15	0.00544465	5	0.00664011	92	0.05509	0.067175
Gohir.D05G157300	140	0.0508167	12	0.0159363	0	0	0.066753
Gohir.A11G254450	74	0.0268603	30	0.0398406	0	0	0.066701
Gohir.A03G154300	120	0.0435572	17	0.0225764	0	0	0.066134
Gohir.A11G008900	21	0.0076225	44	0.0584329	0	0	0.066055
Gohir.A05G260200	2	0.000725953	5	0.00664011	98	0.058683	0.066049
Gohir.A05G179000	105	0.0381125	21	0.0278884	0	0	0.066001
Gohir.D05G216400	83	0.030127	27	0.0358566	0	0	0.065984
Gohir.A03G071400	130	0.0471869	14	0.0185923	0	0	0.065779
Gohir.A06G037400	18	0.00653357	3	0.00398406	92	0.05509	0.065607
Gohir.D12G187350	107	0.0388385	20	0.0265604	0	0	0.065399
Gohir.D05G143400	14	0.00508167	3	0.00398406	94	0.056287	0.065353
Gohir.A05G093600	1	0.000362976	2	0.00265604	104	0.062275	0.065294
Gohir.A02G108800	84	0.03049	26	0.0345286	0	0	0.065019
Gohir.D05G133100	94	0.0341198	23	0.0305445	0	0	0.064664
Gohir.A08G028800	134	0.0486388	12	0.0159363	0	0	0.064575
Gohir.D05G182200	101	0.0366606	21	0.0278884	0	0	0.064549
Gohir.D12G146000	66	0.0239564	30	0.0398406	0	0	0.063797
Gohir.D03G001900	95	0.0344828	22	0.0292165	0	0	0.063699
Gohir.D12G009800	90	0.0326679	23	0.0305445	0	0	0.063212
Gohir.D11G047000	79	0.0286751	26	0.0345286	0	0	0.063204
Gohir.A08G102700	115	0.0417423	16	0.0212483	0	0	0.062991
Gohir.D07G027200	74	0.0268603	27	0.0358566	0	0	0.062717
Gohir.A05G204000	125	0.0453721	13	0.0172643	0	0	0.062636
Gohir.D06G008400	99	0.0359347	20	0.0265604	0	0	0.062495
Gohir.D03G088500	87	0.0315789	23	0.0305445	0	0	0.062123
Gohir.A07G221900	94	0.0341198	21	0.0278884	0	0	0.062008
Gohir.A06G105100	61	0.0221416	30	0.0398406	0	0	0.061982
Gohir.A01G154000	93	0.0337568	21	0.0278884	0	0	0.061645
Gohir.D11G073900	106	0.0384755	17	0.0225764	0	0	0.061052
Gohir.A05G307000	8	0.00290381	9	0.0119522	77	0.046108	0.060964
Gohir.D07G228600	76	0.0275862	25	0.0332005	0	0	0.060787
Gohir.A09G014600	65	0.0235935	28	0.0371846	0	0	0.060778
Gohir.D13G049200	54	0.0196007	31	0.0411687	0	0	0.060769
Gohir.D02G012500	26	0.00943739	2	0.00265604	81	0.048503	0.060596
Gohir.D06G038900	3	0.00108893	4	0.00531209	90	0.053892	0.060293
Gohir.D12G118100	38	0.0137931	35	0.0464807	0	0	0.060274
Gohir.D05G207200	111	0.0402904	15	0.0199203	0	0	0.060211
Gohir.A05G190900	96	0.0348457	19	0.0252324	0	0	0.060078
Gohir.D01G086600	60	0.0217786	9	0.0119522	44	0.026347	0.060078
Gohir.D01G135100	52	0.0188748	31	0.0411687	0	0	0.060043
Gohir.A11G051900	28	0.0101633	5	0.00664011	72	0.043114	0.059917
Gohir.D05G030700	33	0.0119782	36	0.0478088	0	0	0.059787
Gohir.D10G035600	73	0.0264973	25	0.0332005	0	0	0.059698
Gohir.D05G292800	7	0.00254083	5	0.00664011	84	0.050299	0.05948
Gohir.D08G036600	3	0.00108893	2	0.00265604	93	0.055689	0.059434
Gohir.A13G076300	104	0.0377495	16	0.0212483	0	0	0.058998
Gohir.D01G100400	59	0.0214156	28	0.0371846	0	0	0.0586
Gohir.D13G152900	23	0.00834846	2	0.00265604	79	0.047305	0.05831
Gohir.A05G404200	64	0.0232305	26	0.0345286	0	0	0.057759
Gohir.A13G088700	17	0.0061706	17	0.0225764	48	0.028743	0.057489
Gohir.A13G102300	19	0.00689655	38	0.0504648	0	0	0.057361
Gohir.D09G111400	103	0.0373866	15	0.0199203	0	0	0.057307
Gohir.D09G039400	70	0.0254083	24	0.0318725	0	0	0.057281
Gohir.A05G141200	4	0.00145191	2	0.00265604	88	0.052695	0.056803
Gohir.D12G170700	10	0.00362976	1	0.00132802	86	0.051497	0.056455
Gohir.D02G087600	60	0.0217786	26	0.0345286	0	0	0.056307
Gohir.D03G031800	60	0.0217786	26	0.0345286	0	0	0.056307
Gohir.A05G284900	129	0.046824	7	0.00929615	0	0	0.05612
Gohir.D07G237600	136	0.0493648	5	0.00664011	0	0	0.056005
Gohir.A11G102400	47	0.0170599	29	0.0385126	0	0	0.055573
Gohir.A08G220600	98	0.0355717	15	0.0199203	0	0	0.055492
Gohir.D08G176900	11	0.00399274	0	0	86	0.051497	0.05549
Gohir.A06G011000	28	0.0101633	34	0.0451527	0	0	0.055316
Gohir.D11G192900	93	0.0337568	16	0.0212483	0	0	0.055005
Gohir.A08G144600	82	0.0297641	19	0.0252324	0	0	0.054996
Gohir.D10G027600	92	0.0333938	16	0.0212483	0	0	0.054642
Gohir.D11G096600	37	0.0134301	31	0.0411687	0	0	0.054599
Gohir.D06G202200	7	0.00254083	8	0.0106242	69	0.041317	0.054482
Gohir.D11G052700	61	0.0221416	24	0.0318725	0	0	0.054014
Gohir.A11G103700	31	0.0112523	19	0.0252324	29	0.017365	0.05385
Gohir.A07G170500	1	0.000362976	1	0.00132802	87	0.052096	0.053787
Gohir.D06G018900	49	0.0177858	27	0.0358566	0	0	0.053642
Gohir.A11G247950	16	0.00580762	4	0.00531209	71	0.042515	0.053635
Gohir.D05G286100	96	0.0348457	14	0.0185923	0	0	0.053438
Gohir.A09G212100	1	0.000362976	0	0	88	0.052695	0.053058
Gohir.A06G194500	8	0.00290381	9	0.0119522	63	0.037725	0.052581
Gohir.D12G051400	46	0.0166969	27	0.0358566	0	0	0.052553
Gohir.D10G043432	31	0.0112523	4	0.00531209	60	0.035928	0.052492
Gohir.D05G286300	86	0.031216	16	0.0212483	0	0	0.052464
Gohir.D04G069600	64	0.0232305	22	0.0292165	0	0	0.052447
Gohir.D10G037600	13	0.00471869	0	0	79	0.047305	0.052024
Gohir.A08G121900	81	0.0294011	17	0.0225764	0	0	0.051977
Gohir.D04G025600	26	0.00943739	32	0.0424967	0	0	0.051934
Gohir.D06G137400	66	0.0239564	21	0.0278884	0	0	0.051845
Gohir.D07G136200	62	0.0225045	22	0.0292165	0	0	0.051721
Gohir.D10G177800	22	0.00798548	9	0.0119522	53	0.031737	0.051674
Gohir.D11G267800	69	0.0250454	20	0.0265604	0	0	0.051606
Gohir.D04G011700	79	0.0286751	17	0.0225764	0	0	0.051251
Gohir.D11G121400	35	0.0127042	29	0.0385126	0	0	0.051217
Gohir.D06G201900	11	0.00399274	3	0.00398406	72	0.043114	0.051091
Gohir.A08G128600	70	0.0254083	19	0.0252324	0	0	0.050641
Gohir.D10G127400	37	0.0134301	28	0.0371846	0	0	0.050615
Gohir.D10G052600	10	0.00362976	1	0.00132802	76	0.045509	0.050467
Gohir.A10G029150	106	0.0384755	9	0.0119522	0	0	0.050428
Gohir.A06G026300	62	0.0225045	21	0.0278884	0	0	0.050393
Gohir.A06G101400	90	0.0326679	13	0.0172643	0	0	0.049932
Gohir.D08G047700	36	0.0130672	16	0.0212483	26	0.015569	0.049884
Gohir.D08G237200	86	0.031216	14	0.0185923	0	0	0.049808
Gohir.D04G075200	64	0.0232305	20	0.0265604	0	0	0.049791
Gohir.A10G167000	19	0.00689655	11	0.0146082	47	0.028144	0.049648
Gohir.A01G101500	54	0.0196007	7	0.00929615	34	0.020359	0.049256
Gohir.A04G143500	29	0.0105263	29	0.0385126	0	0	0.049039
Gohir.D07G178100	21	0.0076225	31	0.0411687	0	0	0.048791
Gohir.A03G177200	10	0.00362976	34	0.0451527	0	0	0.048782
Gohir.A12G175190	35	0.0127042	27	0.0358566	0	0	0.048561
Gohir.A13G040900	2	0.000725953	3	0.00398406	73	0.043713	0.048423
Gohir.A01G145200	104	0.0377495	8	0.0106242	0	0	0.048374
Gohir.A05G081300	67	0.0243194	18	0.0239044	0	0	0.048224
Gohir.A13G101800	34	0.0123412	27	0.0358566	0	0	0.048198
Gohir.D07G163300	52	0.0188748	22	0.0292165	0	0	0.048091
Gohir.D11G250700	26	0.00943739	29	0.0385126	0	0	0.04795
Gohir.A09G073000	69	0.0250454	17	0.0225764	0	0	0.047622
Gohir.A13G167900	42	0.015245	8	0.0106242	36	0.021557	0.047426
Gohir.A04G126000	123	0.0446461	2	0.00265604	0	0	0.047302
Gohir.A12G088700	22	0.00798548	6	0.00796813	52	0.031138	0.047091
Gohir.D10G182700	85	0.030853	12	0.0159363	0	0	0.046789
Gohir.D11G258300	32	0.0116152	7	0.00929615	43	0.025749	0.04666
Gohir.A09G208450	48	0.0174229	22	0.0292165	0	0	0.046639
Gohir.A07G005200	18	0.00653357	30	0.0398406	0	0	0.046374
Gohir.D07G143900	76	0.0275862	14	0.0185923	0	0	0.046179
Gohir.D08G143300	61	0.0221416	18	0.0239044	0	0	0.046046
Gohir.A12G170100	27	0.00980036	27	0.0358566	0	0	0.045657
Gohir.D05G199400	20	0.00725953	4	0.00531209	55	0.032934	0.045506
Gohir.D06G103300	80	0.0290381	12	0.0159363	0	0	0.044974
Gohir.A08G026100	72	0.0261343	14	0.0185923	0	0	0.044727
Gohir.D07G068700	75	0.0272232	13	0.0172643	0	0	0.044488
Gohir.D06G070200	41	0.014882	22	0.0292165	0	0	0.044099
Gohir.D05G262100	1	0.000362976	3	0.00398406	66	0.039521	0.043868
Gohir.D09G193200	7	0.00254083	2	0.00265604	64	0.038323	0.04352
Gohir.A13G064566	72	0.0261343	13	0.0172643	0	0	0.043399
Gohir.D10G164500	19	0.00689655	7	0.00929615	45	0.026946	0.043139
Gohir.D05G264600	78	0.0283122	11	0.0146082	0	0	0.04292
Gohir.D05G209501	34	0.0123412	23	0.0305445	0	0	0.042886
Gohir.D13G054300	5	0.00181488	2	0.00265604	64	0.038323	0.042794
Gohir.D05G347900	7	0.00254083	1	0.00132802	65	0.038922	0.042791
Gohir.D13G035900	63	0.0228675	15	0.0199203	0	0	0.042788
Gohir.D13G070000	52	0.0188748	18	0.0239044	0	0	0.042779
Gohir.A08G024700	15	0.00544465	28	0.0371846	0	0	0.042629
Gohir.D10G243300	69	0.0250454	13	0.0172643	0	0	0.04231
Gohir.A09G201500	4	0.00145191	1	0.00132802	66	0.039521	0.042301
Gohir.A10G170700	26	0.00943739	4	0.00531209	46	0.027545	0.042294
Gohir.D12G179300	32	0.0116152	23	0.0305445	0	0	0.04216
Gohir.A05G412400	39	0.0141561	21	0.0278884	0	0	0.042045
Gohir.A08G097550	57	0.0206897	16	0.0212483	0	0	0.041938
Gohir.A05G241100	75	0.0272232	11	0.0146082	0	0	0.041831
Gohir.D05G091200	42	0.015245	20	0.0265604	0	0	0.041805
Gohir.D12G173400	71	0.0257713	12	0.0159363	0	0	0.041708
Gohir.A12G069600	56	0.0203267	16	0.0212483	0	0	0.041575
Gohir.A12G208200	4	0.00145191	0	0	67	0.04012	0.041572
Gohir.D02G197400	23	0.00834846	1	0.00132802	53	0.031737	0.041413
Gohir.A09G114700	59	0.0214156	15	0.0199203	0	0	0.041336
Gohir.D05G230700	12	0.00435572	3	0.00398406	55	0.032934	0.041274
Gohir.A05G205000	36	0.0130672	21	0.0278884	0	0	0.040956
Gohir.A11G121700	65	0.0235935	13	0.0172643	0	0	0.040858
Gohir.D07G113800	94	0.0341198	5	0.00664011	0	0	0.04076
Gohir.A12G152900	61	0.0221416	14	0.0185923	0	0	0.040734
Gohir.D05G157900	17	0.0061706	26	0.0345286	0	0	0.040699
Gohir.A09G007800	2	0.000725953	3	0.00398406	60	0.035928	0.040638
Gohir.D04G135800	49	0.0177858	17	0.0225764	0	0	0.040362
Gohir.A06G098212	38	0.0137931	20	0.0265604	0	0	0.040354
Gohir.A05G277500	67	0.0243194	12	0.0159363	0	0	0.040256
Gohir.A02G057700	20	0.00725953	8	0.0106242	37	0.022156	0.040039
Gohir.A13G096200	37	0.0134301	20	0.0265604	0	0	0.039991
Gohir.D03G020100	77	0.0279492	9	0.0119522	0	0	0.039901
Gohir.D09G072600	77	0.0279492	9	0.0119522	0	0	0.039901
Gohir.A02G177900	44	0.015971	18	0.0239044	0	0	0.039875
Gohir.A13G046200	44	0.015971	18	0.0239044	0	0	0.039875
Gohir.A06G016000	33	0.0119782	21	0.0278884	0	0	0.039867
Gohir.D09G049500	73	0.0264973	10	0.0132802	0	0	0.039777
Gohir.D04G018500	29	0.0105263	22	0.0292165	0	0	0.039743
Gohir.D01G047800	3	0.00108893	1	0.00132802	62	0.037126	0.039543
Gohir.D06G099900	39	0.0141561	19	0.0252324	0	0	0.039388
Gohir.D08G008900	6	0.00217786	8	0.0106242	44	0.026347	0.039149
Gohir.A12G120900	28	0.0101633	11	0.0146082	24	0.014371	0.039143
Gohir.D09G244900	52	0.0188748	15	0.0199203	0	0	0.038795
Gohir.A05G213000	55	0.0199637	14	0.0185923	0	0	0.038556
Gohir.A05G067500	91	0.0330309	4	0.00531209	0	0	0.038343
Gohir.A06G082400	91	0.0330309	4	0.00531209	0	0	0.038343
Gohir.A07G103300	61	0.0221416	12	0.0159363	0	0	0.038078
Gohir.A01G033700	49	0.0177858	15	0.0199203	0	0	0.037706
Gohir.D12G089600	45	0.0163339	16	0.0212483	0	0	0.037582
Gohir.A12G271800	34	0.0123412	19	0.0252324	0	0	0.037574
Gohir.A03G041400	48	0.0174229	15	0.0199203	0	0	0.037343
Gohir.D05G275700	7	0.00254083	26	0.0345286	0	0	0.037069
Gohir.D04G005900	3	0.00108893	0	0	60	0.035928	0.037017
Gohir.A06G096700	58	0.0210526	12	0.0159363	0	0	0.036989
Gohir.A03G014700	43	0.015608	16	0.0212483	0	0	0.036856
Gohir.A13G053414	32	0.0116152	19	0.0252324	0	0	0.036848
Gohir.D07G191900	32	0.0116152	19	0.0252324	0	0	0.036848
Gohir.A04G035500	11	0.00399274	1	0.00132802	52	0.031138	0.036458
Gohir.A11G300300	49	0.0177858	14	0.0185923	0	0	0.036378
Gohir.D08G045000	59	0.0214156	11	0.0146082	0	0	0.036024
Gohir.D07G184200	37	0.0134301	17	0.0225764	0	0	0.036006
Gohir.D06G217600	33	0.0119782	18	0.0239044	0	0	0.035883
Gohir.A05G153600	22	0.00798548	21	0.0278884	0	0	0.035874
Gohir.A10G042460	21	0.0076225	5	0.00664011	36	0.021557	0.035819
Gohir.D08G140800	62	0.0225045	10	0.0132802	0	0	0.035785
Gohir.A11G155900	23	0.00834846	3	0.00398406	39	0.023353	0.035686
Gohir.A11G010000	36	0.0130672	17	0.0225764	0	0	0.035644
Gohir.D13G105600	43	0.015608	15	0.0199203	0	0	0.035528
Gohir.A05G041500	39	0.0141561	16	0.0212483	0	0	0.035404
Gohir.D11G034300	68	0.0246824	8	0.0106242	0	0	0.035307
Gohir.D11G141500	42	0.015245	15	0.0199203	0	0	0.035165
Gohir.A12G206500	49	0.0177858	13	0.0172643	0	0	0.03505
Gohir.D11G100800	23	0.00834846	20	0.0265604	0	0	0.034909
Gohir.A04G094600	12	0.00435572	23	0.0305445	0	0	0.0349
Gohir.A01G126000	63	0.0228675	9	0.0119522	0	0	0.03482
Gohir.D02G209300	4	0.00145191	2	0.00265604	51	0.030539	0.034647
Gohir.D01G206600	1	0.000362976	1	0.00132802	55	0.032934	0.034625
Gohir.D12G083300	25	0.00907441	2	0.00265604	38	0.022754	0.034485
Gohir.A13G146600	62	0.0225045	9	0.0119522	0	0	0.034457
Gohir.A08G158200	40	0.0145191	15	0.0199203	0	0	0.034439
Gohir.A08G132900	29	0.0105263	18	0.0239044	0	0	0.034431
Gohir.D05G135800	29	0.0105263	18	0.0239044	0	0	0.034431
Gohir.A10G033800	25	0.00907441	19	0.0252324	0	0	0.034307
Gohir.A12G009800	25	0.00907441	19	0.0252324	0	0	0.034307
Gohir.D08G132800	25	0.00907441	19	0.0252324	0	0	0.034307
Gohir.D01G188100	14	0.00508167	22	0.0292165	0	0	0.034298
Gohir.D02G198000	54	0.0196007	11	0.0146082	0	0	0.034209
Gohir.D06G017800	54	0.0196007	11	0.0146082	0	0	0.034209
Gohir.A10G229300	21	0.0076225	20	0.0265604	0	0	0.034183
Gohir.D12G098700	39	0.0141561	15	0.0199203	0	0	0.034076
Gohir.A01G141389	4	0.00145191	2	0.00265604	50	0.02994	0.034048
Gohir.D01G146000	13	0.00471869	22	0.0292165	0	0	0.033935
Gohir.A05G336700	60	0.0217786	9	0.0119522	0	0	0.033731
Gohir.A10G200600	60	0.0217786	9	0.0119522	0	0	0.033731
Gohir.A11G240600	60	0.0217786	9	0.0119522	0	0	0.033731
Gohir.A13G072500	56	0.0203267	10	0.0132802	0	0	0.033607
Gohir.A10G229400	12	0.00435572	22	0.0292165	0	0	0.033572
Gohir.D12G064300	59	0.0214156	9	0.0119522	0	0	0.033368
Gohir.A12G215000	48	0.0174229	12	0.0159363	0	0	0.033359
Gohir.D05G021800	48	0.0174229	12	0.0159363	0	0	0.033359
Gohir.D13G039600	8	0.00290381	3	0.00398406	44	0.026347	0.033235
Gohir.A11G116200	25	0.00907441	18	0.0239044	0	0	0.032979
Gohir.D01G126700	1	0.000362976	6	0.00796813	41	0.024551	0.032882
Gohir.A10G012000	32	0.0116152	16	0.0212483	0	0	0.032864
Gohir.D10G045300	50	0.0181488	11	0.0146082	0	0	0.032757
Gohir.D09G007300	75	0.0272232	4	0.00531209	0	0	0.032535
Gohir.A04G096000	42	0.015245	13	0.0172643	0	0	0.032509
Gohir.D08G257100	56	0.0203267	9	0.0119522	0	0	0.032279
Gohir.A05G198800	48	0.0174229	11	0.0146082	0	0	0.032031
Gohir.D12G267100	48	0.0174229	11	0.0146082	0	0	0.032031
Gohir.D08G178500	37	0.0134301	14	0.0185923	0	0	0.032022
Gohir.A08G037400	39	0.0141561	3	0.00398406	23	0.013772	0.031913
Gohir.A01G112300	33	0.0119782	15	0.0199203	0	0	0.031899
Gohir.A08G141500	61	0.0221416	7	0.00929615	0	0	0.031438
Gohir.D09G007200	7	0.00254083	1	0.00132802	46	0.027545	0.031414
Gohir.D13G170100	57	0.0206897	8	0.0106242	0	0	0.031314
Gohir.A10G086300	64	0.0232305	6	0.00796813	0	0	0.031199
Gohir.A02G148600	31	0.0112523	15	0.0199203	0	0	0.031173
Gohir.D02G190200	27	0.00980036	16	0.0212483	0	0	0.031049
Gohir.D09G146400	27	0.00980036	16	0.0212483	0	0	0.031049
Gohir.D11G162800	19	0.00689655	1	0.00132802	38	0.022754	0.030979
Gohir.A06G182900	45	0.0163339	11	0.0146082	0	0	0.030942
Gohir.D05G142600	41	0.014882	12	0.0159363	0	0	0.030818
Gohir.A03G188600	6	0.00217786	3	0.00398406	41	0.024551	0.030713
Gohir.A05G187900	66	0.0239564	5	0.00664011	0	0	0.030597
Gohir.A12G080500	29	0.0105263	15	0.0199203	0	0	0.030447
Gohir.D13G085900	2	0.000725953	2	0.00265604	45	0.026946	0.030328
Gohir.A01G195200	54	0.0196007	8	0.0106242	0	0	0.030225
Gohir.D05G153100	43	0.015608	11	0.0146082	0	0	0.030216
Gohir.D01G182600	35	0.0127042	13	0.0172643	0	0	0.029968
Gohir.D03G153000	35	0.0127042	13	0.0172643	0	0	0.029968
Gohir.A07G138800	31	0.0112523	14	0.0185923	0	0	0.029845
Gohir.A13G067400	4	0.00145191	1	0.00132802	45	0.026946	0.029726
Gohir.A09G047900	34	0.0123412	13	0.0172643	0	0	0.029605
Gohir.A11G009300	41	0.014882	11	0.0146082	0	0	0.02949
Gohir.A12G023700	3	0.00108893	1	0.00132802	45	0.026946	0.029363
Gohir.D08G230600	26	0.00943739	15	0.0199203	0	0	0.029358
Gohir.D05G061300	44	0.015971	10	0.0132802	0	0	0.029251
Gohir.A12G076300	37	0.0134301	0	0	26	0.015569	0.028999
Gohir.A09G150700	21	0.0076225	16	0.0212483	0	0	0.028871
Gohir.D08G062000	39	0.0141561	11	0.0146082	0	0	0.028764
Gohir.A11G322900	24	0.00871143	15	0.0199203	0	0	0.028632
Gohir.D07G002900	24	0.00871143	15	0.0199203	0	0	0.028632
Gohir.A10G104100	30	0.0108893	7	0.00929615	14	0.008383	0.028569
Gohir.A04G082100	42	0.015245	10	0.0132802	0	0	0.028525
Gohir.D08G187000	71	0.0257713	2	0.00265604	0	0	0.028427
Gohir.D10G041700	38	0.0137931	11	0.0146082	0	0	0.028401
Gohir.A06G085300	45	0.0163339	9	0.0119522	0	0	0.028286
Gohir.D05G053400	26	0.00943739	14	0.0185923	0	0	0.02803
Gohir.D06G137100	4	0.00145191	20	0.0265604	0	0	0.028012
Gohir.A01G137695	0	0	2	0.00265604	42	0.02515	0.027806
Gohir.D10G170350	14	0.00508167	17	0.0225764	0	0	0.027658
Gohir.D11G341500	54	0.0196007	6	0.00796813	0	0	0.027569
Gohir.D11G200500	43	0.015608	9	0.0119522	0	0	0.02756
Gohir.A02G003000	21	0.0076225	15	0.0199203	0	0	0.027543
Gohir.A06G180000	21	0.0076225	15	0.0199203	0	0	0.027543
Gohir.A06G020500	39	0.0141561	10	0.0132802	0	0	0.027436
Gohir.A05G196400	28	0.0101633	13	0.0172643	0	0	0.027428
Gohir.D01G110500	24	0.00871143	14	0.0185923	0	0	0.027304
Gohir.D05G199500	24	0.00871143	14	0.0185923	0	0	0.027304
Gohir.D11G239700	13	0.00471869	17	0.0225764	0	0	0.027295
Gohir.D01G132300	11	0.00399274	4	0.00531209	30	0.017964	0.027269
Gohir.A10G088200	42	0.015245	9	0.0119522	0	0	0.027197
Gohir.A04G002000	20	0.00725953	15	0.0199203	0	0	0.02718
Gohir.D12G124700	20	0.00725953	5	0.00664011	22	0.013174	0.027073
Gohir.A12G114800	8	0.00290381	18	0.0239044	0	0	0.026808
Gohir.A05G063500	59	0.0214156	4	0.00531209	0	0	0.026728
Gohir.D01G108400	55	0.0199637	5	0.00664011	0	0	0.026604
Gohir.A06G199000	33	0.0119782	11	0.0146082	0	0	0.026586
Gohir.A12G253300	33	0.0119782	11	0.0146082	0	0	0.026586
Gohir.D10G194500	22	0.00798548	14	0.0185923	0	0	0.026578
Gohir.D02G058200	47	0.0170599	7	0.00929615	0	0	0.026356
Gohir.A03G101700	43	0.015608	8	0.0106242	0	0	0.026232
Gohir.D12G074400	32	0.0116152	11	0.0146082	0	0	0.026223
Gohir.A09G139000	21	0.0076225	14	0.0185923	0	0	0.026215
Gohir.D05G049700	72	0.0261343	0	0	0	0	0.026134
Gohir.A06G131500	39	0.0141561	9	0.0119522	0	0	0.026108
Gohir.D01G196300	39	0.0141561	9	0.0119522	0	0	0.026108
Gohir.D11G008600	39	0.0141561	9	0.0119522	0	0	0.026108
Gohir.A07G142700	24	0.00871143	13	0.0172643	0	0	0.025976
Gohir.A12G225800	24	0.00871143	13	0.0172643	0	0	0.025976
Gohir.D12G178100	27	0.00980036	12	0.0159363	0	0	0.025737
Gohir.D06G138500	16	0.00580762	15	0.0199203	0	0	0.025728
Gohir.D05G201500	41	0.014882	8	0.0106242	0	0	0.025506
Gohir.D06G067400	41	0.014882	8	0.0106242	0	0	0.025506
Gohir.D10G026100	41	0.014882	8	0.0106242	0	0	0.025506
Gohir.D05G070400	59	0.0214156	3	0.00398406	0	0	0.0254
Gohir.D05G059500	48	0.0174229	6	0.00796813	0	0	0.025391
Gohir.A10G176100	37	0.0134301	9	0.0119522	0	0	0.025382
Gohir.D12G020300	37	0.0134301	9	0.0119522	0	0	0.025382
Gohir.D12G062100	26	0.00943739	12	0.0159363	0	0	0.025374
Gohir.A05G119500	58	0.0210526	3	0.00398406	0	0	0.025037
Gohir.D05G124000	25	0.00907441	12	0.0159363	0	0	0.025011
Gohir.A06G194100	21	0.0076225	13	0.0172643	0	0	0.024887
Gohir.A10G101400	10	0.00362976	16	0.0212483	0	0	0.024878
Gohir.D11G104500	68	0.0246824	0	0	0	0	0.024682
Gohir.D13G045300	53	0.0192378	4	0.00531209	0	0	0.02455
Gohir.A11G043500	20	0.00725953	13	0.0172643	0	0	0.024524
Gohir.A08G111800	45	0.0163339	6	0.00796813	0	0	0.024302
Gohir.D07G128400	34	0.0123412	9	0.0119522	0	0	0.024293
Gohir.D06G181000	63	0.0228675	1	0.00132802	0	0	0.024196
Gohir.D07G107200	41	0.014882	7	0.00929615	0	0	0.024178
Gohir.D10G099700	37	0.0134301	8	0.0106242	0	0	0.024054
Gohir.A05G273600	26	0.00943739	11	0.0146082	0	0	0.024046
Gohir.A05G209000	40	0.0145191	7	0.00929615	0	0	0.023815
Gohir.A05G199916	7	0.00254083	16	0.0212483	0	0	0.023789
Gohir.D12G123100	14	0.00508167	14	0.0185923	0	0	0.023674
Gohir.A08G153966	21	0.0076225	12	0.0159363	0	0	0.023559
Gohir.D10G173000	8	0.00290381	2	0.00265604	30	0.017964	0.023524
Gohir.D03G107800	35	0.0127042	8	0.0106242	0	0	0.023328
Gohir.A09G162400	31	0.0112523	9	0.0119522	0	0	0.023204
Gohir.D11G108100	18	0.00653357	3	0.00398406	21	0.012575	0.023092
Gohir.A02G081300	27	0.00980036	10	0.0132802	0	0	0.023081
Gohir.A05G250000	16	0.00580762	13	0.0172643	0	0	0.023072
Gohir.A13G019500	12	0.00435572	14	0.0185923	0	0	0.022948
Gohir.D11G250100	52	0.0188748	3	0.00398406	0	0	0.022859
Gohir.D08G155100	37	0.0134301	7	0.00929615	0	0	0.022726
Gohir.D09G170800	37	0.0134301	7	0.00929615	0	0	0.022726
Gohir.A03G167100	26	0.00943739	10	0.0132802	0	0	0.022718
Gohir.D01G099100	15	0.00544465	13	0.0172643	0	0	0.022709
Gohir.D10G208551	29	0.0105263	9	0.0119522	0	0	0.022479
Gohir.D02G137800	36	0.0130672	7	0.00929615	0	0	0.022363
Gohir.A11G099600	25	0.00907441	10	0.0132802	0	0	0.022355
Gohir.D02G200900	25	0.00907441	10	0.0132802	0	0	0.022355
Gohir.D06G186900	21	0.0076225	11	0.0146082	0	0	0.022231
Gohir.D09G241700	10	0.00362976	14	0.0185923	0	0	0.022222
Gohir.A03G144900	28	0.0101633	9	0.0119522	0	0	0.022116
Gohir.D11G331300	17	0.0061706	12	0.0159363	0	0	0.022107
Gohir.A08G000200	57	0.0206897	1	0.00132802	0	0	0.022018
Gohir.D09G184100	24	0.00871143	10	0.0132802	0	0	0.021992
Gohir.A05G346000	13	0.00471869	13	0.0172643	0	0	0.021983
Gohir.A10G038400	20	0.00725953	11	0.0146082	0	0	0.021868
Gohir.A11G193400	20	0.00725953	11	0.0146082	0	0	0.021868
Gohir.D07G153800	20	0.00725953	11	0.0146082	0	0	0.021868
Gohir.D11G040800	20	0.00725953	11	0.0146082	0	0	0.021868
Gohir.D11G133600	16	0.00580762	12	0.0159363	0	0	0.021744
Gohir.D11G106866	48	0.0174229	3	0.00398406	0	0	0.021407
Gohir.A11G212200	37	0.0134301	6	0.00796813	0	0	0.021398
Gohir.A11G001700	15	0.00544465	12	0.0159363	0	0	0.021381
Gohir.D12G212200	15	0.00544465	12	0.0159363	0	0	0.021381
Gohir.A02G145100	33	0.0119782	7	0.00929615	0	0	0.021274
Gohir.D07G186100	33	0.0119782	7	0.00929615	0	0	0.021274
Gohir.A02G168900	25	0.00907441	9	0.0119522	0	0	0.021027
Gohir.A12G252200	39	0.0141561	5	0.00664011	0	0	0.020796
Gohir.D11G211800	28	0.0101633	8	0.0106242	0	0	0.020788
Gohir.A07G022168	17	0.0061706	11	0.0146082	0	0	0.020779
Gohir.D08G145600	6	0.00217786	14	0.0185923	0	0	0.02077
Gohir.A11G181800	46	0.0166969	3	0.00398406	0	0	0.020681
Gohir.A05G193200	35	0.0127042	6	0.00796813	0	0	0.020672
Gohir.D10G102400	24	0.00871143	9	0.0119522	0	0	0.020664
Gohir.D06G040900	13	0.00471869	12	0.0159363	0	0	0.020655
Gohir.D05G276000	45	0.0163339	3	0.00398406	0	0	0.020318
Gohir.D04G098400	23	0.00834846	9	0.0119522	0	0	0.020301
Gohir.A06G071500	12	0.00435572	12	0.0159363	0	0	0.020292
Gohir.A13G147100	37	0.0134301	5	0.00664011	0	0	0.02007
Gohir.D02G063500	9	0.00326679	3	0.00398406	21	0.012575	0.019826
Gohir.D05G096600	29	0.0105263	7	0.00929615	0	0	0.019822
Gohir.A10G112800	7	0.00254083	13	0.0172643	0	0	0.019805
Gohir.A08G133900	36	0.0130672	5	0.00664011	0	0	0.019707
Gohir.A11G227400	25	0.00907441	8	0.0106242	0	0	0.019699
Gohir.D04G109500	25	0.00907441	8	0.0106242	0	0	0.019699
Gohir.D06G023600	25	0.00907441	8	0.0106242	0	0	0.019699
Gohir.A06G172200	54	0.0196007	0	0	0	0	0.019601
Gohir.D11G123000	10	0.00362976	12	0.0159363	0	0	0.019566
Gohir.A03G124300	50	0.0181488	1	0.00132802	0	0	0.019477
Gohir.D06G109300	17	0.0061706	10	0.0132802	0	0	0.019451
Gohir.D03G016400	13	0.00471869	11	0.0146082	0	0	0.019327
Gohir.D13G151900	2	0.000725953	0	0	31	0.018563	0.019289
Gohir.A08G168500	42	0.015245	3	0.00398406	0	0	0.019229
Gohir.A12G164400	20	0.00725953	9	0.0119522	0	0	0.019212
Gohir.D12G024400	6	0.00217786	2	0.00265604	24	0.014371	0.019205
Gohir.D12G272500	9	0.00326679	12	0.0159363	0	0	0.019203
Gohir.D08G026600	1	0.000362976	14	0.0185923	0	0	0.018955
Gohir.A05G051900	30	0.0108893	6	0.00796813	0	0	0.018857
Gohir.A02G023300	37	0.0134301	4	0.00531209	0	0	0.018742
Gohir.A06G078800	15	0.00544465	10	0.0132802	0	0	0.018725
Gohir.D13G035000	15	0.00544465	10	0.0132802	0	0	0.018725
Gohir.D07G020700	22	0.00798548	8	0.0106242	0	0	0.01861
Gohir.D11G190200	22	0.00798548	8	0.0106242	0	0	0.01861
Gohir.D08G262000	36	0.0130672	4	0.00531209	0	0	0.018379
Gohir.A12G101966	14	0.00508167	10	0.0132802	0	0	0.018362
Gohir.D01G185500	3	0.00108893	13	0.0172643	0	0	0.018353
Gohir.D01G018100	21	0.0076225	8	0.0106242	0	0	0.018247
Gohir.D10G087600	6	0.00217786	12	0.0159363	0	0	0.018114
Gohir.A05G206200	24	0.00871143	7	0.00929615	0	0	0.018008
Gohir.D07G115600	6	0.00217786	2	0.00265604	22	0.013174	0.018008
Gohir.A08G213500	13	0.00471869	10	0.0132802	0	0	0.017999
Gohir.D05G280100	31	0.0112523	5	0.00664011	0	0	0.017892
Gohir.D11G239200	5	0.00181488	12	0.0159363	0	0	0.017751
Gohir.D06G206300	30	0.0108893	5	0.00664011	0	0	0.017529
Gohir.A05G409600	19	0.00689655	8	0.0106242	0	0	0.017521
Gohir.D06G078100	19	0.00689655	8	0.0106242	0	0	0.017521
Gohir.A11G266200	8	0.00290381	11	0.0146082	0	0	0.017512
Gohir.A12G072400	44	0.015971	1	0.00132802	0	0	0.017299
Gohir.A06G021100	22	0.00798548	7	0.00929615	0	0	0.017282
Gohir.A03G096800	11	0.00399274	10	0.0132802	0	0	0.017273
Gohir.A07G147200	40	0.0145191	2	0.00265604	0	0	0.017175
Gohir.D03G035500	36	0.0130672	3	0.00398406	0	0	0.017051
Gohir.A06G203900	32	0.0116152	4	0.00531209	0	0	0.016927
Gohir.D12G146200	21	0.0076225	7	0.00929615	0	0	0.016919
Gohir.A09G048400	39	0.0141561	2	0.00265604	0	0	0.016812
Gohir.D06G062800	17	0.0061706	8	0.0106242	0	0	0.016795
Gohir.D10G034500	6	0.00217786	11	0.0146082	0	0	0.016786
Gohir.A05G376800	13	0.00471869	9	0.0119522	0	0	0.016671
Gohir.D05G212200	42	0.015245	1	0.00132802	0	0	0.016573
Gohir.D08G114300	31	0.0112523	4	0.00531209	0	0	0.016564
Gohir.D11G342000	20	0.00725953	7	0.00929615	0	0	0.016556
Gohir.A03G150800	9	0.00326679	10	0.0132802	0	0	0.016547
Gohir.D01G090100	9	0.00326679	10	0.0132802	0	0	0.016547
Gohir.A08G072100	30	0.0108893	4	0.00531209	0	0	0.016201
Gohir.D09G158000	8	0.00290381	10	0.0132802	0	0	0.016184
Gohir.D11G210900	26	0.00943739	5	0.00664011	0	0	0.016077
Gohir.A10G027500	15	0.00544465	8	0.0106242	0	0	0.016069
Gohir.A11G077800	15	0.00544465	8	0.0106242	0	0	0.016069
Gohir.A13G073800	15	0.00544465	8	0.0106242	0	0	0.016069
Gohir.D11G055300	15	0.00544465	8	0.0106242	0	0	0.016069
Gohir.D12G105100	4	0.00145191	11	0.0146082	0	0	0.01606
Gohir.D13G073900	22	0.00798548	6	0.00796813	0	0	0.015954
Gohir.D13G049800	0	0	12	0.0159363	0	0	0.015936
Gohir.A01G142900	25	0.00907441	5	0.00664011	0	0	0.015715
Gohir.D10G094600	25	0.00907441	5	0.00664011	0	0	0.015715
Gohir.A11G045800	3	0.00108893	11	0.0146082	0	0	0.015697
Gohir.D07G006900	32	0.0116152	3	0.00398406	0	0	0.015599
Gohir.A12G020100	21	0.0076225	6	0.00796813	0	0	0.015591
Gohir.A03G183400	17	0.0061706	7	0.00929615	0	0	0.015467
Gohir.D06G046500	24	0.00871143	5	0.00664011	0	0	0.015352
Gohir.D06G135400	13	0.00471869	8	0.0106242	0	0	0.015343
Gohir.D08G151700	13	0.00471869	8	0.0106242	0	0	0.015343
Gohir.D10G154600	2	0.000725953	11	0.0146082	0	0	0.015334
Gohir.D02G044700	16	0.00580762	7	0.00929615	0	0	0.015104
Gohir.A05G372500	5	0.00181488	10	0.0132802	0	0	0.015095
Gohir.A10G093500	5	0.00181488	10	0.0132802	0	0	0.015095
Gohir.A11G125400	5	0.00181488	10	0.0132802	0	0	0.015095
Gohir.A12G123400	23	0.00834846	5	0.00664011	0	0	0.014989
Gohir.D08G048700	19	0.00689655	6	0.00796813	0	0	0.014865
Gohir.D02G030600	26	0.00943739	4	0.00531209	0	0	0.014749
Gohir.A12G218400	15	0.00544465	7	0.00929615	0	0	0.014741
Gohir.A07G061400	22	0.00798548	5	0.00664011	0	0	0.014626
Gohir.D06G060900	22	0.00798548	5	0.00664011	0	0	0.014626
Gohir.D05G190900	11	0.00399274	8	0.0106242	0	0	0.014617
Gohir.D02G051200	13	0.00471869	2	0.00265604	12	0.007186	0.01456
Gohir.A05G162700	18	0.00653357	6	0.00796813	0	0	0.014502
Gohir.A08G038500	14	0.00508167	7	0.00929615	0	0	0.014378
Gohir.A10G027200	21	0.0076225	5	0.00664011	0	0	0.014263
Gohir.D03G025000	21	0.0076225	5	0.00664011	0	0	0.014263
Gohir.A10G066600	10	0.00362976	8	0.0106242	0	0	0.014254
Gohir.A11G135300	13	0.00471869	7	0.00929615	0	0	0.014015
Gohir.D05G175100	13	0.00471869	7	0.00929615	0	0	0.014015
Gohir.A05G036500	20	0.00725953	5	0.00664011	0	0	0.0139
Gohir.A06G062600	20	0.00725953	5	0.00664011	0	0	0.0139
Gohir.A11G085800	20	0.00725953	5	0.00664011	0	0	0.0139
Gohir.D02G205000	20	0.00725953	5	0.00664011	0	0	0.0139
Gohir.D03G061800	20	0.00725953	5	0.00664011	0	0	0.0139
Gohir.A09G165500	9	0.00326679	8	0.0106242	0	0	0.013891
Gohir.A11G092300	12	0.00435572	7	0.00929615	0	0	0.013652
Gohir.A12G266700	12	0.00435572	7	0.00929615	0	0	0.013652
Gohir.A10G200800	26	0.00943739	3	0.00398406	0	0	0.013421
Gohir.A11G109200	26	0.00943739	3	0.00398406	0	0	0.013421
Gohir.A05G123100	15	0.00544465	6	0.00796813	0	0	0.013413
Gohir.A05G396800	15	0.00544465	6	0.00796813	0	0	0.013413
Gohir.D01G218700	4	0.00145191	9	0.0119522	0	0	0.013404
Gohir.A07G021000	33	0.0119782	1	0.00132802	0	0	0.013306
Gohir.A06G127202	11	0.00399274	7	0.00929615	0	0	0.013289
Gohir.A09G165700	11	0.00399274	7	0.00929615	0	0	0.013289
Gohir.A07G134200	29	0.0105263	2	0.00265604	0	0	0.013182
Gohir.D12G226900	29	0.0105263	2	0.00265604	0	0	0.013182
Gohir.A10G139500	7	0.00254083	8	0.0106242	0	0	0.013165
Gohir.D05G203000	7	0.00254083	8	0.0106242	0	0	0.013165
Gohir.D09G013450	7	0.00254083	8	0.0106242	0	0	0.013165
Gohir.D12G167000	25	0.00907441	3	0.00398406	0	0	0.013058
Gohir.A09G096600	14	0.00508167	6	0.00796813	0	0	0.01305
Gohir.D11G276500	31	0.0112523	1	0.00132802	0	0	0.01258
Gohir.A12G224200	20	0.00725953	4	0.00531209	0	0	0.012572
Gohir.D07G100001	20	0.00725953	4	0.00531209	0	0	0.012572
Gohir.D02G173700	9	0.00326679	7	0.00929615	0	0	0.012563
Gohir.D13G073800	16	0.00580762	5	0.00664011	0	0	0.012448
Gohir.D05G206601	12	0.00435572	6	0.00796813	0	0	0.012324
Gohir.A05G257900	1	0.000362976	9	0.0119522	0	0	0.012315
Gohir.A01G019600	4	0.00145191	8	0.0106242	0	0	0.012076
Gohir.D03G160500	4	0.00145191	8	0.0106242	0	0	0.012076
Gohir.D12G060500	4	0.00145191	8	0.0106242	0	0	0.012076
Gohir.A09G032500	11	0.00399274	6	0.00796813	0	0	0.011961
Gohir.D04G149100	7	0.00254083	7	0.00929615	0	0	0.011837
Gohir.D11G136200	25	0.00907441	2	0.00265604	0	0	0.01173
Gohir.A03G146100	14	0.00508167	5	0.00664011	0	0	0.011722
Gohir.A05G133800	14	0.00508167	5	0.00664011	0	0	0.011722
Gohir.A12G240400	14	0.00508167	5	0.00664011	0	0	0.011722
Gohir.D08G154200	14	0.00508167	5	0.00664011	0	0	0.011722
Gohir.A02G118900	3	0.00108893	8	0.0106242	0	0	0.011713
Gohir.A07G063900	21	0.0076225	3	0.00398406	0	0	0.011607
Gohir.A11G108200	21	0.0076225	3	0.00398406	0	0	0.011607
Gohir.D01G087300	17	0.0061706	4	0.00531209	0	0	0.011483
Gohir.A03G186200	6	0.00217786	7	0.00929615	0	0	0.011474
Gohir.D07G172550	31	0.0112523	0	0	0	0	0.011252
Gohir.D07G023500	9	0.00326679	6	0.00796813	0	0	0.011235
Gohir.D12G220700	16	0.00580762	4	0.00531209	0	0	0.01112
Gohir.A06G131000	5	0.00181488	7	0.00929615	0	0	0.011111
Gohir.A09G179600	12	0.00435572	5	0.00664011	0	0	0.010996
Gohir.D09G135600	30	0.0108893	0	0	0	0	0.010889
Gohir.A08G232400	8	0.00290381	6	0.00796813	0	0	0.010872
Gohir.D11G225700	15	0.00544465	4	0.00531209	0	0	0.010757
Gohir.A10G025400	4	0.00145191	7	0.00929615	0	0	0.010748
Gohir.A11G226200	11	0.00399274	5	0.00664011	0	0	0.010633
Gohir.D10G226100	0	0	8	0.0106242	0	0	0.010624
Gohir.D08G232200	18	0.00653357	3	0.00398406	0	0	0.010518
Gohir.A01G197900	7	0.00254083	6	0.00796813	0	0	0.010509
Gohir.A06G064200	7	0.00254083	6	0.00796813	0	0	0.010509
Gohir.D06G014200	7	0.00254083	6	0.00796813	0	0	0.010509
Gohir.D12G253300	7	0.00254083	6	0.00796813	0	0	0.010509
Gohir.A07G112100	4	0.00145191	0	0	15	0.008982	0.010434
Gohir.A03G060000	25	0.00907441	1	0.00132802	0	0	0.010402
Gohir.A08G241300	21	0.0076225	2	0.00265604	0	0	0.010279
Gohir.D13G152134	21	0.0076225	2	0.00265604	0	0	0.010279
Gohir.D12G127000	10	0.00362976	5	0.00664011	0	0	0.01027
Gohir.A03G076000	28	0.0101633	0	0	0	0	0.010163
Gohir.D13G084300	24	0.00871143	1	0.00132802	0	0	0.010039
Gohir.A08G122900	13	0.00471869	4	0.00531209	0	0	0.010031
Gohir.D06G009200	2	0.000725953	7	0.00929615	0	0	0.010022
Gohir.D10G250800	2	0.000725953	7	0.00929615	0	0	0.010022
Gohir.A08G027000	9	0.00326679	5	0.00664011	0	0	0.009907
Gohir.D12G061700	9	0.00326679	5	0.00664011	0	0	0.009907
Gohir.A11G234200	16	0.00580762	3	0.00398406	0	0	0.009792
Gohir.A03G002000	5	0.00181488	6	0.00796813	0	0	0.009783
Gohir.A09G167700	5	0.00181488	6	0.00796813	0	0	0.009783
Gohir.D07G137900	5	0.00181488	6	0.00796813	0	0	0.009783
Gohir.A07G110200	23	0.00834846	1	0.00132802	0	0	0.009676
Gohir.A12G092700	1	0.000362976	7	0.00929615	0	0	0.009659
Gohir.A07G212500	19	0.00689655	2	0.00265604	0	0	0.009553
Gohir.A02G155600	8	0.00290381	5	0.00664011	0	0	0.009544
Gohir.D02G079500	8	0.00290381	5	0.00664011	0	0	0.009544
Gohir.A03G149100	26	0.00943739	0	0	0	0	0.009437
Gohir.D01G081400	4	0.00145191	6	0.00796813	0	0	0.00942
Gohir.A12G164000	22	0.00798548	1	0.00132802	0	0	0.009314
Gohir.A05G096400	11	0.00399274	4	0.00531209	0	0	0.009305
Gohir.D09G174900	11	0.00399274	4	0.00531209	0	0	0.009305
Gohir.D12G255600	11	0.00399274	4	0.00531209	0	0	0.009305
Gohir.A03G006600	0	0	7	0.00929615	0	0	0.009296
Gohir.A06G046000	18	0.00653357	2	0.00265604	0	0	0.00919
Gohir.D05G181000	18	0.00653357	2	0.00265604	0	0	0.00919
Gohir.D11G115800	7	0.00254083	5	0.00664011	0	0	0.009181
Gohir.D12G217100	14	0.00508167	3	0.00398406	0	0	0.009066
Gohir.A09G053700	3	0.00108893	6	0.00796813	0	0	0.009057
Gohir.A12G196500	3	0.00108893	6	0.00796813	0	0	0.009057
Gohir.A05G067900	21	0.0076225	1	0.00132802	0	0	0.008951
Gohir.A01G058800	10	0.00362976	4	0.00531209	0	0	0.008942
Gohir.A07G231300	10	0.00362976	4	0.00531209	0	0	0.008942
Gohir.D05G066100	17	0.0061706	2	0.00265604	0	0	0.008827
Gohir.A11G183700	13	0.00471869	3	0.00398406	0	0	0.008703
Gohir.D03G165600	13	0.00471869	3	0.00398406	0	0	0.008703
Gohir.D07G016000	13	0.00471869	3	0.00398406	0	0	0.008703
Gohir.A06G023600	2	0.000725953	6	0.00796813	0	0	0.008694
Gohir.D01G153900	2	0.000725953	6	0.00796813	0	0	0.008694
Gohir.D05G100200	2	0.000725953	6	0.00796813	0	0	0.008694
Gohir.D05G263900	2	0.000725953	6	0.00796813	0	0	0.008694
Gohir.A03G102000	9	0.00326679	4	0.00531209	0	0	0.008579
Gohir.A08G052400	9	0.00326679	4	0.00531209	0	0	0.008579
Gohir.A09G236500	9	0.00326679	4	0.00531209	0	0	0.008579
Gohir.A11G009200	9	0.00326679	4	0.00531209	0	0	0.008579
Gohir.D08G139100	9	0.00326679	4	0.00531209	0	0	0.008579
Gohir.A05G023100	5	0.00181488	5	0.00664011	0	0	0.008455
Gohir.D04G134100	5	0.00181488	5	0.00664011	0	0	0.008455
Gohir.D09G053062	5	0.00181488	5	0.00664011	0	0	0.008455
Gohir.A11G130400	12	0.00435572	3	0.00398406	0	0	0.00834
Gohir.A13G033700	12	0.00435572	3	0.00398406	0	0	0.00834
Gohir.D13G123300	12	0.00435572	3	0.00398406	0	0	0.00834
Gohir.A03G105600	1	0.000362976	6	0.00796813	0	0	0.008331
Gohir.D01G113500	1	0.000362976	6	0.00796813	0	0	0.008331
Gohir.D10G216100	19	0.00689655	1	0.00132802	0	0	0.008225
Gohir.A05G067450	8	0.00290381	4	0.00531209	0	0	0.008216
Gohir.A08G060600	8	0.00290381	4	0.00531209	0	0	0.008216
Gohir.A12G060400	8	0.00290381	4	0.00531209	0	0	0.008216
Gohir.A08G172500	4	0.00145191	5	0.00664011	0	0	0.008092
Gohir.A13G004300	4	0.00145191	5	0.00664011	0	0	0.008092
Gohir.D09G047100	4	0.00145191	5	0.00664011	0	0	0.008092
Gohir.D12G220600	4	0.00145191	5	0.00664011	0	0	0.008092
Gohir.D13G100700	4	0.00145191	5	0.00664011	0	0	0.008092
Gohir.D09G032500	22	0.00798548	0	0	0	0	0.007985
Gohir.D10G079800	11	0.00399274	3	0.00398406	0	0	0.007977
Gohir.D11G047600	0	0	6	0.00796813	0	0	0.007968
Gohir.D12G077200	18	0.00653357	1	0.00132802	0	0	0.007862
Gohir.A05G057500	7	0.00254083	4	0.00531209	0	0	0.007853
Gohir.A11G127880	7	0.00254083	4	0.00531209	0	0	0.007853
Gohir.D08G011200	14	0.00508167	2	0.00265604	0	0	0.007738
Gohir.A03G010100	3	0.00108893	5	0.00664011	0	0	0.007729
Gohir.A05G076600	3	0.00108893	5	0.00664011	0	0	0.007729
Gohir.A12G073100	3	0.00108893	5	0.00664011	0	0	0.007729
Gohir.A12G178100	3	0.00108893	5	0.00664011	0	0	0.007729
Gohir.D07G185300	21	0.0076225	0	0	0	0	0.007623
Gohir.A06G129800	10	0.00362976	3	0.00398406	0	0	0.007614
Gohir.D04G120600	10	0.00362976	3	0.00398406	0	0	0.007614
Gohir.A06G039866	6	0.00217786	4	0.00531209	0	0	0.00749
Gohir.D05G160350	6	0.00217786	4	0.00531209	0	0	0.00749
Gohir.D10G027800	6	0.00217786	4	0.00531209	0	0	0.00749
Gohir.A03G005900	13	0.00471869	2	0.00265604	0	0	0.007375
Gohir.A01G187100	2	0.000725953	5	0.00664011	0	0	0.007366
Gohir.A09G104000	2	0.000725953	5	0.00664011	0	0	0.007366
Gohir.D02G126800	9	0.00326679	3	0.00398406	0	0	0.007251
Gohir.A07G002600	5	0.00181488	4	0.00531209	0	0	0.007127
Gohir.A10G168300	5	0.00181488	4	0.00531209	0	0	0.007127
Gohir.D06G134200	5	0.00181488	4	0.00531209	0	0	0.007127
Gohir.D08G084000	5	0.00181488	4	0.00531209	0	0	0.007127
Gohir.A05G335500	12	0.00435572	2	0.00265604	0	0	0.007012
Gohir.D02G011680	12	0.00435572	2	0.00265604	0	0	0.007012
Gohir.D02G177200	1	0.000362976	5	0.00664011	0	0	0.007003
Gohir.A09G073300	8	0.00290381	3	0.00398406	0	0	0.006888
Gohir.A13G040200	8	0.00290381	3	0.00398406	0	0	0.006888
Gohir.D05G108100	8	0.00290381	3	0.00398406	0	0	0.006888
Gohir.D06G134700	8	0.00290381	3	0.00398406	0	0	0.006888
Gohir.D06G190000	15	0.00544465	1	0.00132802	0	0	0.006773
Gohir.A11G216000	4	0.00145191	4	0.00531209	0	0	0.006764
Gohir.A11G314100	4	0.00145191	4	0.00531209	0	0	0.006764
Gohir.D13G084400	4	0.00145191	4	0.00531209	0	0	0.006764
Gohir.A02G038301	11	0.00399274	2	0.00265604	0	0	0.006649
Gohir.A07G176800	7	0.00254083	3	0.00398406	0	0	0.006525
Gohir.A08G215500	7	0.00254083	3	0.00398406	0	0	0.006525
Gohir.D03G166600	7	0.00254083	3	0.00398406	0	0	0.006525
Gohir.D10G094800	7	0.00254083	3	0.00398406	0	0	0.006525
Gohir.D04G190600	3	0.00108893	4	0.00531209	0	0	0.006401
Gohir.D13G069800	3	0.00108893	4	0.00531209	0	0	0.006401
Gohir.A05G172000	10	0.00362976	2	0.00265604	0	0	0.006286
Gohir.A11G186100	17	0.0061706	0	0	0	0	0.006171
Gohir.A09G163700	6	0.00217786	3	0.00398406	0	0	0.006162
Gohir.A05G308250	13	0.00471869	1	0.00132802	0	0	0.006047
Gohir.A12G196000	13	0.00471869	1	0.00132802	0	0	0.006047
Gohir.D11G113700	13	0.00471869	1	0.00132802	0	0	0.006047
Gohir.D01G044900	2	0.000725953	4	0.00531209	0	0	0.006038
Gohir.D05G121600	2	0.000725953	4	0.00531209	0	0	0.006038
Gohir.A11G118100	9	0.00326679	2	0.00265604	0	0	0.005923
Gohir.A12G209500	9	0.00326679	2	0.00265604	0	0	0.005923
Gohir.D07G131900	9	0.00326679	2	0.00265604	0	0	0.005923
Gohir.D13G038900	9	0.00326679	2	0.00265604	0	0	0.005923
Gohir.A05G024300	5	0.00181488	3	0.00398406	0	0	0.005799
Gohir.A05G120600	5	0.00181488	3	0.00398406	0	0	0.005799
Gohir.D04G003600	5	0.00181488	3	0.00398406	0	0	0.005799
Gohir.A06G149900	12	0.00435572	1	0.00132802	0	0	0.005684
Gohir.D02G154200	12	0.00435572	1	0.00132802	0	0	0.005684
Gohir.A07G177900	1	0.000362976	4	0.00531209	0	0	0.005675
Gohir.A12G096000	1	0.000362976	4	0.00531209	0	0	0.005675
Gohir.D08G157900	1	0.000362976	4	0.00531209	0	0	0.005675
Gohir.D12G065600	1	0.000362976	4	0.00531209	0	0	0.005675
Gohir.D10G034600	8	0.00290381	2	0.00265604	0	0	0.00556
Gohir.A09G008900	15	0.00544465	0	0	0	0	0.005445
Gohir.A06G111100	4	0.00145191	3	0.00398406	0	0	0.005436
Gohir.A11G096100	4	0.00145191	3	0.00398406	0	0	0.005436
Gohir.D02G207000	4	0.00145191	3	0.00398406	0	0	0.005436
Gohir.D05G024600	0	0	4	0.00531209	0	0	0.005312
Gohir.A09G046700	7	0.00254083	2	0.00265604	0	0	0.005197
Gohir.A12G119500	7	0.00254083	2	0.00265604	0	0	0.005197
Gohir.D08G035200	7	0.00254083	2	0.00265604	0	0	0.005197
Gohir.A05G233800	3	0.00108893	3	0.00398406	0	0	0.005073
Gohir.A12G141300	3	0.00108893	3	0.00398406	0	0	0.005073
Gohir.A12G218300	3	0.00108893	3	0.00398406	0	0	0.005073
Gohir.D02G083100	3	0.00108893	3	0.00398406	0	0	0.005073
Gohir.D08G208400	3	0.00108893	3	0.00398406	0	0	0.005073
Gohir.D11G026500	3	0.00108893	3	0.00398406	0	0	0.005073
Gohir.D03G122000	10	0.00362976	1	0.00132802	0	0	0.004958
Gohir.D05G116900	10	0.00362976	1	0.00132802	0	0	0.004958
Gohir.D10G027900	10	0.00362976	1	0.00132802	0	0	0.004958
Gohir.D03G171500	6	0.00217786	2	0.00265604	0	0	0.004834
Gohir.D08G252600	6	0.00217786	2	0.00265604	0	0	0.004834
Gohir.D11G097100	6	0.00217786	2	0.00265604	0	0	0.004834
Gohir.A03G078424	13	0.00471869	0	0	0	0	0.004719
Gohir.A03G103600	2	0.000725953	3	0.00398406	0	0	0.00471
Gohir.A05G217000	2	0.000725953	3	0.00398406	0	0	0.00471
Gohir.A09G156000	2	0.000725953	3	0.00398406	0	0	0.00471
Gohir.A13G126500	2	0.000725953	3	0.00398406	0	0	0.00471
Gohir.A07G016200	9	0.00326679	1	0.00132802	0	0	0.004595
Gohir.A08G167100	9	0.00326679	1	0.00132802	0	0	0.004595
Gohir.D09G104500	9	0.00326679	1	0.00132802	0	0	0.004595
Gohir.D12G087000	9	0.00326679	1	0.00132802	0	0	0.004595
Gohir.A01G217700	5	0.00181488	2	0.00265604	0	0	0.004471
Gohir.A06G030400	5	0.00181488	2	0.00265604	0	0	0.004471
Gohir.A06G183300	5	0.00181488	2	0.00265604	0	0	0.004471
Gohir.A12G162100	5	0.00181488	2	0.00265604	0	0	0.004471
Gohir.A12G176600	5	0.00181488	2	0.00265604	0	0	0.004471
Gohir.A12G260900	5	0.00181488	2	0.00265604	0	0	0.004471
Gohir.D05G259300	5	0.00181488	2	0.00265604	0	0	0.004471
Gohir.D09G123100	5	0.00181488	2	0.00265604	0	0	0.004471
Gohir.D10G080600	5	0.00181488	2	0.00265604	0	0	0.004471
Gohir.A07G041000	1	0.000362976	3	0.00398406	0	0	0.004347
Gohir.A12G068500	1	0.000362976	3	0.00398406	0	0	0.004347
Gohir.A12G204250	1	0.000362976	3	0.00398406	0	0	0.004347
Gohir.A12G231400	1	0.000362976	3	0.00398406	0	0	0.004347
Gohir.D01G008050	1	0.000362976	3	0.00398406	0	0	0.004347
Gohir.A08G118100	8	0.00290381	1	0.00132802	0	0	0.004232
Gohir.A12G216900	8	0.00290381	1	0.00132802	0	0	0.004232
Gohir.A13G084600	4	0.00145191	2	0.00265604	0	0	0.004108
Gohir.D07G045200	4	0.00145191	2	0.00265604	0	0	0.004108
Gohir.D08G037200	4	0.00145191	2	0.00265604	0	0	0.004108
Gohir.D09G178300	4	0.00145191	2	0.00265604	0	0	0.004108
Gohir.A11G248500	11	0.00399274	0	0	0	0	0.003993
Gohir.A04G047900	0	0	3	0.00398406	0	0	0.003984
Gohir.A13G175000	0	0	3	0.00398406	0	0	0.003984
Gohir.D07G238500	0	0	3	0.00398406	0	0	0.003984
Gohir.D11G049400	0	0	3	0.00398406	0	0	0.003984
Gohir.A05G059200	7	0.00254083	1	0.00132802	0	0	0.003869
Gohir.D05G084300	7	0.00254083	1	0.00132802	0	0	0.003869
Gohir.D05G267000	7	0.00254083	1	0.00132802	0	0	0.003869
Gohir.D06G084600	7	0.00254083	1	0.00132802	0	0	0.003869
Gohir.D11G090000	7	0.00254083	1	0.00132802	0	0	0.003869
Gohir.A01G104900	3	0.00108893	2	0.00265604	0	0	0.003745
Gohir.A03G076400	3	0.00108893	2	0.00265604	0	0	0.003745
Gohir.D09G018800	3	0.00108893	2	0.00265604	0	0	0.003745
Gohir.D09G167100	3	0.00108893	2	0.00265604	0	0	0.003745
Gohir.D08G072600	10	0.00362976	0	0	0	0	0.00363
Gohir.D09G163600	10	0.00362976	0	0	0	0	0.00363
Gohir.A09G007900	6	0.00217786	1	0.00132802	0	0	0.003506
Gohir.A10G033900	6	0.00217786	1	0.00132802	0	0	0.003506
Gohir.A11G037500	6	0.00217786	1	0.00132802	0	0	0.003506
Gohir.D11G336600	6	0.00217786	1	0.00132802	0	0	0.003506
Gohir.A09G171600	2	0.000725953	2	0.00265604	0	0	0.003382
Gohir.A11G300200	2	0.000725953	2	0.00265604	0	0	0.003382
Gohir.A12G096300	2	0.000725953	2	0.00265604	0	0	0.003382
Gohir.A12G214400	2	0.000725953	2	0.00265604	0	0	0.003382
Gohir.D06G020700	2	0.000725953	2	0.00265604	0	0	0.003382
Gohir.D08G039500	2	0.000725953	2	0.00265604	0	0	0.003382
Gohir.D09G038300	2	0.000725953	2	0.00265604	0	0	0.003382
Gohir.D12G116400	2	0.000725953	2	0.00265604	0	0	0.003382
Gohir.D13G004100	2	0.000725953	2	0.00265604	0	0	0.003382
Gohir.D13G142200	2	0.000725953	2	0.00265604	0	0	0.003382
Gohir.A05G100400	9	0.00326679	0	0	0	0	0.003267
Gohir.A12G214500	9	0.00326679	0	0	0	0	0.003267
Gohir.D11G040300	9	0.00326679	0	0	0	0	0.003267
Gohir.A05G285200	5	0.00181488	1	0.00132802	0	0	0.003143
Gohir.A06G019400	5	0.00181488	1	0.00132802	0	0	0.003143
Gohir.A08G137000	5	0.00181488	1	0.00132802	0	0	0.003143
Gohir.A09G126400	5	0.00181488	1	0.00132802	0	0	0.003143
Gohir.A12G159200	5	0.00181488	1	0.00132802	0	0	0.003143
Gohir.D04G141500	5	0.00181488	1	0.00132802	0	0	0.003143
Gohir.A05G157600	1	0.000362976	2	0.00265604	0	0	0.003019
Gohir.A06G135100	1	0.000362976	2	0.00265604	0	0	0.003019
Gohir.A11G177000	1	0.000362976	2	0.00265604	0	0	0.003019
Gohir.A12G141100	1	0.000362976	2	0.00265604	0	0	0.003019
Gohir.D05G156300	1	0.000362976	2	0.00265604	0	0	0.003019
Gohir.D13G105300	1	0.000362976	2	0.00265604	0	0	0.003019
Gohir.A05G264500	8	0.00290381	0	0	0	0	0.002904
Gohir.A11G197200	8	0.00290381	0	0	0	0	0.002904
Gohir.D02G119300	8	0.00290381	0	0	0	0	0.002904
Gohir.D05G374500	8	0.00290381	0	0	0	0	0.002904
Gohir.D11G112700	8	0.00290381	0	0	0	0	0.002904
Gohir.A02G075300	4	0.00145191	1	0.00132802	0	0	0.00278
Gohir.A06G068800	4	0.00145191	1	0.00132802	0	0	0.00278
Gohir.A08G189900	4	0.00145191	1	0.00132802	0	0	0.00278
Gohir.A09G097800	4	0.00145191	1	0.00132802	0	0	0.00278
Gohir.A13G163100	4	0.00145191	1	0.00132802	0	0	0.00278
Gohir.D02G126400	4	0.00145191	1	0.00132802	0	0	0.00278
Gohir.D02G202200	4	0.00145191	1	0.00132802	0	0	0.00278
Gohir.D09G237300	4	0.00145191	1	0.00132802	0	0	0.00278
Gohir.A03G058300	0	0	2	0.00265604	0	0	0.002656
Gohir.A08G114100	0	0	2	0.00265604	0	0	0.002656
Gohir.A11G078200	0	0	2	0.00265604	0	0	0.002656
Gohir.A13G146800	0	0	2	0.00265604	0	0	0.002656
Gohir.D03G095300	0	0	2	0.00265604	0	0	0.002656
Gohir.D04G086301	0	0	2	0.00265604	0	0	0.002656
Gohir.D05G220400	0	0	2	0.00265604	0	0	0.002656
Gohir.D13G227125	0	0	2	0.00265604	0	0	0.002656
Gohir.A01G194600	7	0.00254083	0	0	0	0	0.002541
Gohir.A05G046300	7	0.00254083	0	0	0	0	0.002541
Gohir.A07G225500	7	0.00254083	0	0	0	0	0.002541
Gohir.D12G162500	7	0.00254083	0	0	0	0	0.002541
Gohir.A05G116080	3	0.00108893	1	0.00132802	0	0	0.002417
Gohir.A11G178800	3	0.00108893	1	0.00132802	0	0	0.002417
Gohir.A13G222042	3	0.00108893	1	0.00132802	0	0	0.002417
Gohir.D02G114500	3	0.00108893	1	0.00132802	0	0	0.002417
Gohir.D09G175100	3	0.00108893	1	0.00132802	0	0	0.002417
Gohir.D11G001600	3	0.00108893	1	0.00132802	0	0	0.002417
Gohir.D12G094100	3	0.00108893	1	0.00132802	0	0	0.002417
Gohir.A11G012700	6	0.00217786	0	0	0	0	0.002178
Gohir.D05G048000	6	0.00217786	0	0	0	0	0.002178
Gohir.D07G104300	6	0.00217786	0	0	0	0	0.002178
Gohir.D11G259400	6	0.00217786	0	0	0	0	0.002178
Gohir.A06G211300	2	0.000725953	1	0.00132802	0	0	0.002054
Gohir.A08G119900	2	0.000725953	1	0.00132802	0	0	0.002054
Gohir.A09G019350	2	0.000725953	1	0.00132802	0	0	0.002054
Gohir.A09G107900	2	0.000725953	1	0.00132802	0	0	0.002054
Gohir.A09G125500	2	0.000725953	1	0.00132802	0	0	0.002054
Gohir.A11G081200	2	0.000725953	1	0.00132802	0	0	0.002054
Gohir.D05G255300	2	0.000725953	1	0.00132802	0	0	0.002054
Gohir.D09G122400	2	0.000725953	1	0.00132802	0	0	0.002054
Gohir.D13G072600	2	0.000725953	1	0.00132802	0	0	0.002054
Gohir.D13G173900	2	0.000725953	1	0.00132802	0	0	0.002054
Gohir.A09G183600	5	0.00181488	0	0	0	0	0.001815
Gohir.A12G243250	5	0.00181488	0	0	0	0	0.001815
Gohir.D08G189400	5	0.00181488	0	0	0	0	0.001815
Gohir.D12G068100	5	0.00181488	0	0	0	0	0.001815
Gohir.D12G235600	5	0.00181488	0	0	0	0	0.001815
Gohir.A01G206900	1	0.000362976	1	0.00132802	0	0	0.001691
Gohir.A03G035500	1	0.000362976	1	0.00132802	0	0	0.001691
Gohir.A08G137900	1	0.000362976	1	0.00132802	0	0	0.001691
Gohir.A08G177800	1	0.000362976	1	0.00132802	0	0	0.001691
Gohir.A10G115200	1	0.000362976	1	0.00132802	0	0	0.001691
Gohir.A11G129300	1	0.000362976	1	0.00132802	0	0	0.001691
Gohir.D01G184800	1	0.000362976	1	0.00132802	0	0	0.001691
Gohir.D03G081400	1	0.000362976	1	0.00132802	0	0	0.001691
Gohir.D04G066600	1	0.000362976	1	0.00132802	0	0	0.001691
Gohir.D04G074400	1	0.000362976	1	0.00132802	0	0	0.001691
Gohir.D05G070900	1	0.000362976	1	0.00132802	0	0	0.001691
Gohir.D05G251800	1	0.000362976	1	0.00132802	0	0	0.001691
Gohir.D08G080300	1	0.000362976	1	0.00132802	0	0	0.001691
Gohir.D10G063600	1	0.000362976	1	0.00132802	0	0	0.001691
Gohir.D11G184800	1	0.000362976	1	0.00132802	0	0	0.001691
Gohir.D11G186400	1	0.000362976	1	0.00132802	0	0	0.001691
Gohir.D12G206633	1	0.000362976	1	0.00132802	0	0	0.001691
Gohir.D13G020100	1	0.000362976	1	0.00132802	0	0	0.001691
Gohir.D13G099500	1	0.000362976	1	0.00132802	0	0	0.001691
Gohir.A02G075900	4	0.00145191	0	0	0	0	0.001452
Gohir.A09G243950	4	0.00145191	0	0	0	0	0.001452
Gohir.D04G043000	4	0.00145191	0	0	0	0	0.001452
Gohir.D07G031800	4	0.00145191	0	0	0	0	0.001452
Gohir.D08G216200	4	0.00145191	0	0	0	0	0.001452
Gohir.D11G008200	4	0.00145191	0	0	0	0	0.001452
Gohir.A05G262000	0	0	1	0.00132802	0	0	0.001328
Gohir.A07G230200	0	0	1	0.00132802	0	0	0.001328
Gohir.A08G231300	0	0	1	0.00132802	0	0	0.001328
Gohir.A09G037265	0	0	1	0.00132802	0	0	0.001328
Gohir.A09G172200	0	0	1	0.00132802	0	0	0.001328
Gohir.A10G202300	0	0	1	0.00132802	0	0	0.001328
Gohir.A10G208000	0	0	1	0.00132802	0	0	0.001328
Gohir.A11G002000	0	0	1	0.00132802	0	0	0.001328
Gohir.A12G064500	0	0	1	0.00132802	0	0	0.001328
Gohir.A13G119600	0	0	1	0.00132802	0	0	0.001328
Gohir.D02G091300	0	0	1	0.00132802	0	0	0.001328
Gohir.D03G011400	0	0	1	0.00132802	0	0	0.001328
Gohir.D03G047700	0	0	1	0.00132802	0	0	0.001328
Gohir.D05G079400	0	0	1	0.00132802	0	0	0.001328
Gohir.D05G236200	0	0	1	0.00132802	0	0	0.001328
Gohir.D08G165600	0	0	1	0.00132802	0	0	0.001328
Gohir.D09G040400	0	0	1	0.00132802	0	0	0.001328
Gohir.D09G095100	0	0	1	0.00132802	0	0	0.001328
Gohir.D11G044700	0	0	1	0.00132802	0	0	0.001328
Gohir.D11G305515	0	0	1	0.00132802	0	0	0.001328
Gohir.D12G241700	0	0	1	0.00132802	0	0	0.001328
Gohir.D13G125600	0	0	1	0.00132802	0	0	0.001328
Gohir.A01G182400	3	0.00108893	0	0	0	0	0.001089
Gohir.A03G045000	3	0.00108893	0	0	0	0	0.001089
Gohir.A03G098800	3	0.00108893	0	0	0	0	0.001089
Gohir.A07G032533	3	0.00108893	0	0	0	0	0.001089
Gohir.A09G095400	3	0.00108893	0	0	0	0	0.001089
Gohir.A10G071700	3	0.00108893	0	0	0	0	0.001089
Gohir.A13G231850	3	0.00108893	0	0	0	0	0.001089
Gohir.D02G130400	3	0.00108893	0	0	0	0	0.001089
Gohir.D02G172100	3	0.00108893	0	0	0	0	0.001089
Gohir.D05G094100	3	0.00108893	0	0	0	0	0.001089
Gohir.D05G264300	3	0.00108893	0	0	0	0	0.001089
Gohir.D08G051700	3	0.00108893	0	0	0	0	0.001089
Gohir.D12G198900	3	0.00108893	0	0	0	0	0.001089
Gohir.D13G048200	3	0.00108893	0	0	0	0	0.001089
Gohir.D13G109300	3	0.00108893	0	0	0	0	0.001089
Gohir.D13G226800	3	0.00108893	0	0	0	0	0.001089
Gohir.A01G007950	2	0.000725953	0	0	0	0	0.000726
Gohir.A02G045200	2	0.000725953	0	0	0	0	0.000726
Gohir.A02G168600	2	0.000725953	0	0	0	0	0.000726
Gohir.A03G106100	2	0.000725953	0	0	0	0	0.000726
Gohir.A07G027750	2	0.000725953	0	0	0	0	0.000726
Gohir.A09G173300	2	0.000725953	0	0	0	0	0.000726
Gohir.D08G050800	2	0.000725953	0	0	0	0	0.000726
Gohir.D11G192700	2	0.000725953	0	0	0	0	0.000726
Gohir.D11G333150	2	0.000725953	0	0	0	0	0.000726
Gohir.D12G130900	2	0.000725953	0	0	0	0	0.000726
Gohir.A01G061250	1	0.000362976	0	0	0	0	0.000363
Gohir.A01G182500	1	0.000362976	0	0	0	0	0.000363
Gohir.A02G102501	1	0.000362976	0	0	0	0	0.000363
Gohir.A04G125900	1	0.000362976	0	0	0	0	0.000363
Gohir.A05G253300	1	0.000362976	0	0	0	0	0.000363
Gohir.A05G261700	1	0.000362976	0	0	0	0	0.000363
Gohir.A05G278400	1	0.000362976	0	0	0	0	0.000363
Gohir.A06G032600	1	0.000362976	0	0	0	0	0.000363
Gohir.A08G058600	1	0.000362976	0	0	0	0	0.000363
Gohir.A09G191000	1	0.000362976	0	0	0	0	0.000363
Gohir.A09G240900	1	0.000362976	0	0	0	0	0.000363
Gohir.A10G023600	1	0.000362976	0	0	0	0	0.000363
Gohir.A10G062000	1	0.000362976	0	0	0	0	0.000363
Gohir.A10G081500	1	0.000362976	0	0	0	0	0.000363
Gohir.A11G075700	1	0.000362976	0	0	0	0	0.000363
Gohir.A11G111700	1	0.000362976	0	0	0	0	0.000363
Gohir.A11G154700	1	0.000362976	0	0	0	0	0.000363
Gohir.A11G241400	1	0.000362976	0	0	0	0	0.000363
Gohir.A12G079100	1	0.000362976	0	0	0	0	0.000363
Gohir.A13G085500	1	0.000362976	0	0	0	0	0.000363
Gohir.D02G169400	1	0.000362976	0	0	0	0	0.000363
Gohir.D03G152900	1	0.000362976	0	0	0	0	0.000363
Gohir.D04G187800	1	0.000362976	0	0	0	0	0.000363
Gohir.D05G316100	1	0.000362976	0	0	0	0	0.000363
Gohir.D06G115000	1	0.000362976	0	0	0	0	0.000363
Gohir.D07G046700	1	0.000362976	0	0	0	0	0.000363
Gohir.D08G172800	1	0.000362976	0	0	0	0	0.000363
Gohir.D08G191000	1	0.000362976	0	0	0	0	0.000363
Gohir.D08G242500	1	0.000362976	0	0	0	0	0.000363
Gohir.D08G251700	1	0.000362976	0	0	0	0	0.000363
Gohir.D09G073000	1	0.000362976	0	0	0	0	0.000363
Gohir.D09G097600	1	0.000362976	0	0	0	0	0.000363
Gohir.D09G169000	1	0.000362976	0	0	0	0	0.000363
Gohir.D10G210500	1	0.000362976	0	0	0	0	0.000363
Gohir.D11G080300	1	0.000362976	0	0	0	0	0.000363
Gohir.D11G081400	1	0.000362976	0	0	0	0	0.000363
Gohir.D12G100700	1	0.000362976	0	0	0	0	0.000363
Gohir.D12G165400	1	0.000362976	0	0	0	0	0.000363
Gohir.D12G244250	1	0.000362976	0	0	0	0	0.000363
Gohir.D13G080500	1	0.000362976	0	0	0	0	0.000363

## Sheet: Supplementary Table 7
		Supplementary Table 7. The association analysis between the five fiber traits and the expression in 15 dpa fiber of 77 hub genes identified by cdynGENIE3.
		Gene ID	correlation-FL	pvalue-FL	correlation-FE	pvalue-FE	correlation-FS	pvalue-FS	correlation-FU	pvalue-FU	correlation-MV	pvalue-MV
		Gohir.D12G208900	-0.45	5.84e-14	NA	NA	-0.33	8.1e-08	-0.35	8.1e-09	NA	NA
		Gohir.A12G037700	-0.38	6.84e-10	NA	NA	NA	NA	-0.22	0.00033401	NA	NA
		Gohir.D13G211400	-0.24	0.000122	NA	NA	-0.15	0.019713	-0.22	0.00036939	NA	NA
		Gohir.D10G208450	-0.25	5.19e-05	NA	NA	NA	NA	-0.22	0.00045054	NA	NA
		Gohir.A09G244800	-0.13	0.047896	NA	NA	NA	NA	-0.22	0.00052912	NA	NA
		Gohir.D12G034700	-0.33	5.72e-08	NA	NA	NA	NA	-0.22	0.00059928	NA	NA
		Gohir.D05G244700	-0.29	2.8e-06	NA	NA	-0.16	0.012452	-0.19	0.002848	NA	NA
		Gohir.D10G027400	-0.41	1.69e-11	NA	NA	-0.19	0.002052	-0.18	0.0039993	NA	NA
		Gohir.A11G034200	-0.32	1.46e-07	NA	NA	NA	NA	-0.18	0.0040039	NA	NA
		Gohir.D11G110500	-0.31	7.46e-07	NA	NA	NA	NA	-0.18	0.0048674	NA	NA
		Gohir.D11G037700	-0.32	2.82e-07	NA	NA	NA	NA	-0.17	0.0057242	NA	NA
		Gohir.D12G108200	NA	NA	NA	NA	NA	NA	-0.17	0.0073699	NA	NA
		Gohir.A04G088500	NA	NA	NA	NA	NA	NA	-0.15	0.01541	NA	NA
		Gohir.A12G117400	NA	NA	NA	NA	NA	NA	-0.15	0.017028	NA	NA
		Gohir.A10G235900	-0.36	3.29e-09	NA	NA	-0.12	0.049463	-0.15	0.017561	NA	NA
		Gohir.A02G033800	NA	NA	-0.14	0.024325	NA	NA	-0.15	0.019885	NA	NA
		Gohir.A01G156400	NA	NA	NA	NA	NA	NA	-0.14	0.028738	NA	NA
		Gohir.A12G026400	-0.31	6.69e-07	NA	NA	NA	NA	-0.14	0.029811	NA	NA
		Gohir.A10G033100	NA	NA	NA	NA	NA	NA	-0.14	0.030289	NA	NA
		Gohir.A05G195500	-0.27	1.85e-05	NA	NA	NA	NA	-0.14	0.032311	NA	NA
		Gohir.A12G254000	NA	NA	NA	NA	NA	NA	0.14	0.023082	NA	NA
		Gohir.D10G037100	0.24	0.000136	NA	NA	0.19	0.002531	0.15	0.016219	NA	NA
		Gohir.D09G041200	0.17	0.008178	NA	NA	NA	NA	0.22	0.00044563	NA	NA
		Gohir.A11G012600	0.3	1.43e-06	NA	NA	NA	NA	0.24	0.00015001	NA	NA
		Gohir.A05G199100	-0.3	1.69e-06	NA	NA	-0.16	0.0108	NA	NA	NA	NA
		Gohir.A01G225700	0.18	0.003657	NA	NA	0.18	0.005362	NA	NA	NA	NA
		Gohir.D03G143400	NA	NA	-0.18	0.0038269	NA	NA	NA	NA	NA	NA
		Gohir.D07G066100	-0.15	0.02139	-0.14	0.028334	NA	NA	NA	NA	NA	NA
		Gohir.A12G215300	0.23	0.000226	NA	NA	NA	NA	NA	NA	NA	NA
		Gohir.D04G185300	0.22	0.000491	NA	NA	NA	NA	NA	NA	NA	NA
		Gohir.A13G160500	0.22	0.000553	NA	NA	NA	NA	NA	NA	NA	NA
		Gohir.D03G091100	0.14	0.028709	NA	NA	NA	NA	NA	NA	NA	NA
		Gohir.A10G034900	-0.13	0.043483	NA	NA	NA	NA	NA	NA	NA	NA
		Gohir.D13G235600	-0.14	0.026203	NA	NA	NA	NA	NA	NA	NA	NA
		Gohir.D08G112600	-0.14	0.024046	NA	NA	NA	NA	NA	NA	NA	NA
		Gohir.A05G369100	-0.15	0.014248	NA	NA	NA	NA	NA	NA	NA	NA
		Gohir.A05G243200	-0.17	0.007359	NA	NA	NA	NA	NA	NA	NA	NA
		Gohir.A05G243100	-0.2	0.001456	NA	NA	NA	NA	NA	NA	NA	NA
		Gohir.A02G164200	-0.26	2.88e-05	NA	NA	NA	NA	NA	NA	NA	NA
		Gohir.A07G131500	-0.35	1.05e-08	NA	NA	NA	NA	NA	NA	NA	NA
		Gohir.A03G025100	NA	NA	NA	NA	NA	NA	NA	NA	-0.13	0.03408

## Sheet: Supplementary Table 8
Supplementary Table 8. The association analysis between the five fiber traits and the expression in 15 dpa fiber of 77 hub genes identified by cCorto.
Gene ID	correlation to FL	pvalue-FL	correlation-FE	pvalue-FE	correlation-FS	pvalue-FS	correlation-FU	pvalue-FU	correlation-MV	pvalue-MV
Gohir.D07G136400	-0.4	5.61e-11	NA	NA	-0.14	0.0293523	-0.22	0.000495	0.13	0.039542
Gohir.A03G122600	NA	NA	-0.13	0.042355	NA	NA	NA	NA	-0.15	0.0149487
Gohir.D11G347900	-0.35	8.57e-09	NA	NA	-0.21	0.000983795	-0.24	0.000145	NA	NA
Gohir.A12G037700	-0.38	6.84e-10	NA	NA	NA	NA	-0.22	0.000334	NA	NA
Gohir.A11G227600	-0.19	0.002124	NA	NA	-0.12	0.0491191	-0.22	0.000405	NA	NA
Gohir.A09G244800	-0.13	0.047896	NA	NA	NA	NA	-0.22	0.000529	NA	NA
Gohir.A01G071033	-0.2	0.001623	NA	NA	-0.23	0.000228224	-0.2	0.001172	NA	NA
Gohir.D10G033800	NA	NA	NA	NA	NA	NA	-0.19	0.002539	NA	NA
Gohir.A08G094800	-0.13	0.033632	NA	NA	NA	NA	-0.19	0.003002	NA	NA
Gohir.D09G245700	NA	NA	NA	NA	NA	NA	-0.17	0.006293	NA	NA
Gohir.D12G108200	NA	NA	NA	NA	NA	NA	-0.17	0.00737	NA	NA
Gohir.A13G036700	NA	NA	NA	NA	-0.19	0.0027404	-0.16	0.00932	NA	NA
Gohir.D12G103400	NA	NA	NA	NA	NA	NA	-0.16	0.009701	NA	NA
Gohir.A01G150200	NA	NA	NA	NA	NA	NA	-0.15	0.018318	NA	NA
Gohir.A12G100400	-0.12	0.04906	NA	NA	NA	NA	-0.15	0.018952	NA	NA
Gohir.D05G292600	-0.25	4.64e-05	NA	NA	NA	NA	-0.14	0.026777	NA	NA
Gohir.A10G033100	NA	NA	NA	NA	NA	NA	-0.14	0.030289	NA	NA
Gohir.D01G215400	NA	NA	NA	NA	NA	NA	-0.13	0.039096	NA	NA
Gohir.A01G143100	-0.15	0.014085	-0.15	0.019003	NA	NA	-0.13	0.043237	NA	NA
Gohir.D12G275100	NA	NA	NA	NA	NA	NA	-0.13	0.043665	NA	NA
Gohir.D10G033700	NA	NA	NA	NA	NA	NA	-0.13	0.046332	NA	NA
Gohir.A01G153200	0.21	0.000679	0.13	0.045128	NA	NA	0.14	0.030067	NA	NA
Gohir.D10G037100	0.24	0.000136	NA	NA	0.19	0.00253072	0.15	0.016219	NA	NA
Gohir.A10G033000	-0.16	0.009003	NA	NA	-0.21	0.000731135	NA	NA	NA	NA
Gohir.A05G199100	-0.3	1.69e-06	NA	NA	-0.16	0.0107996	NA	NA	NA	NA
Gohir.D08G174900	NA	NA	NA	NA	0.12	0.0493235	NA	NA	NA	NA
Gohir.D13G165700	0.29	3.7e-06	NA	NA	0.17	0.00635457	NA	NA	NA	NA
Gohir.D02G093100	0.17	0.008775	NA	NA	0.3	1.29e-06	NA	NA	NA	NA
Gohir.A10G036400	0.14	0.030157	-0.17	0.006861	NA	NA	NA	NA	NA	NA
Gohir.D11G209000	NA	NA	-0.17	0.007215	NA	NA	NA	NA	NA	NA
Gohir.D05G103700	NA	NA	-0.14	0.031793	NA	NA	NA	NA	NA	NA
Gohir.A08G095300	NA	NA	-0.13	0.039316	NA	NA	NA	NA	NA	NA
Gohir.D05G301150	NA	NA	0.16	0.013352	NA	NA	NA	NA	NA	NA
Gohir.A05G243100	-0.2	0.001456	NA	NA	NA	NA	NA	NA	NA	NA
Gohir.D08G112600	-0.14	0.024046	NA	NA	NA	NA	NA	NA	NA	NA
Gohir.D12G168800	-0.14	0.02415	NA	NA	NA	NA	NA	NA	NA	NA
Gohir.D08G144300	0.13	0.044668	NA	NA	NA	NA	NA	NA	NA	NA
Gohir.D12G143700	0.13	0.035323	NA	NA	NA	NA	NA	NA	NA	NA
Gohir.D09G220800	0.14	0.028209	NA	NA	NA	NA	NA	NA	NA	NA
Gohir.D06G219100	0.14	0.0271	NA	NA	NA	NA	NA	NA	NA	NA
Gohir.A03G113400	0.15	0.014886	NA	NA	NA	NA	NA	NA	NA	NA
Gohir.A04G140801	0.18	0.004396	NA	NA	NA	NA	NA	NA	NA	NA
Gohir.A13G160500	0.22	0.000553	NA	NA	NA	NA	NA	NA	NA	NA
Gohir.D04G185300	0.22	0.000491	NA	NA	NA	NA	NA	NA	NA	NA
Gohir.A05G103900	0.26	2.75e-05	NA	NA	NA	NA	NA	NA	NA	NA

## Sheet: Supplementary Table 9
Supplementary Table 9. homologous transcription factor and gene pairs in cellulose synthesis-related subnetwork inferred by cGENIE3
At id	Dt id	Gene name	At component	Dt component
Gohir.A04G140801	Gohir.D04G185300	GhSPE3	SCW and PCW	SCW and PCW
Gohir.A12G104200	Gohir.D12G108200	GhANL2	PCW	PCW
Gohir.A05G008500	Gohir.D05G009200	GhCesA1	PCW	PCW
Gohir.A08G144300	Gohir.D08G165300	GhCesA3	PCW	PCW
Gohir.A03G071400	Gohir.D03G098000	GhDof5.4	PCW	SCW
Gohir.A12G272100	Gohir.D12G272900	GhHOX3	PCW	PCW
Gohir.A11G275700	Gohir.D11G286100	GhPIF3	PCW	PCW
Gohir.A11G084100	Gohir.D11G088300	GhTCP9	PCW	PCW
Gohir.A07G204700	Gohir.D07G210700	GhCesA4	SCW	SCW
Gohir.A10G035300	Gohir.D10G036000	GhCesA8	SCW	SCW
Gohir.A05G301500	Gohir.D05G301150	GhDof	SCW	SCW and PCW
Gohir.A12G116300	Gohir.D12G119800	GhFSN1	SCW	SCW
Gohir.A05G365800	Gohir.D04G049200	GhMYB30	SCW	SCW
Gohir.A07G205266	Gohir.D07G211500	GhMYB30	SCW	SCW
Gohir.A10G036400	Gohir.D10G037100	GhMYS1	SCW	SCW
Gohir.A05G158500	Gohir.D05G161100	GhSDN2	SCW	SCW
Gohir.A05G027000	Gohir.D05G028900	GhSND4	SCW	SCW

## Sheet: Supplementary Table 10
Supplementary Table 10. The number of expressed paired and unpaired scOGs in different modules.
Module name	number of scOGs in A subgenome gene	number of scOGs in D subgenome gene	unpair scOGs in A subgenome	unpair scOGs in D subgenome	pair scOGs	pair scOGs being TFs	unpaired scOGs being TF in A subgenome	unpaired scOGs being TF in D subgenome
turquoise	2918	2904	1316	1302	1602	275	143	145
blue	1864	1871	980	987	884	23	40	40
brown	2161	2243	1058	1140	1103	72	91	82
yellow	1602	1661	958	1017	644	30	38	46
green	1567	1605	784	822	783	53	40	42
grey	3243	3228	3245	3225	3901	284	258	228
red	911	883	361	333	550	7	8	18
black	462	432	175	145	287	0	0	2
pink	353	352	198	197	155	32	22	28
magenta	92	71	75	54	17	2	6	7
purple	181	181	120	120	61	1	7	13
greenyellow	159	160	131	132	28	2	13	9
tan	96	109	58	71	38	7	11	9
salmon	99	117	87	105	12	0	8	8
cyan	112	108	47	43	65	2	1	3
midnightblue	46	60	28	42	18	4	4	4
lightcyan	57	40	53	36	4	0	2	5
grey60	38	50	19	31	19	9	9	3
lightgreen	40	28	40	28	0	0	1	5
lightyellow	40	41	33	34	7	2	2	6
royalblue	18	19	15	16	3	0	2	1
total	16059	16163	9781	9880	10181	805	706	704
Total excluding grey	12816	12935	6536	6655	6280	521	448	476

[truncated: 7 more sheets: Supplementary Table 11, Supplementary Table 12, Supplementary Table 13, Supplementary Table 14, Supplementary Table 15, Supplementary Table 16, Supplementary Table 17]
